# Supplementary material for: Nickel-catalyzed alkylation of ketones and nitriles with primary alcohols
Source: Royal Society of Chemistry journal article supplement (doi:10.1039/d2ob01787c), 2022-01-01
Supplement: d2ob01787c1.pdf [file d2ob01787c1.pdf]

## Supporting Information

### Nickel-Catalyzed Alkylation of Ketones and Nitriles with Primary Alcohols

Sertaç Genç, Burcu Arslan, Derya Gülcemal, Süleyman Gülcemal, and Salih Günnaz\*

Ege University, Department of Chemistry, 35100 Bornova, Izmir, Turkey

\* E-mail: [salih.gunnaz@ege.edu.tr](mailto:salih.gunnaz@ege.edu.tr)

#### Contents

|                                                                             |        |
|-----------------------------------------------------------------------------|--------|
| 1. Monitoring of the reaction by $^1\text{H}$ NMR in toluene- $d_8$ .....   | S2     |
| 2. Time course of the<br>reaction.....                                      | S2     |
| 3. Traces of $^1\text{H}$ and $^{13}\text{C}$ NMR spectra of products ..... | S3-S41 |

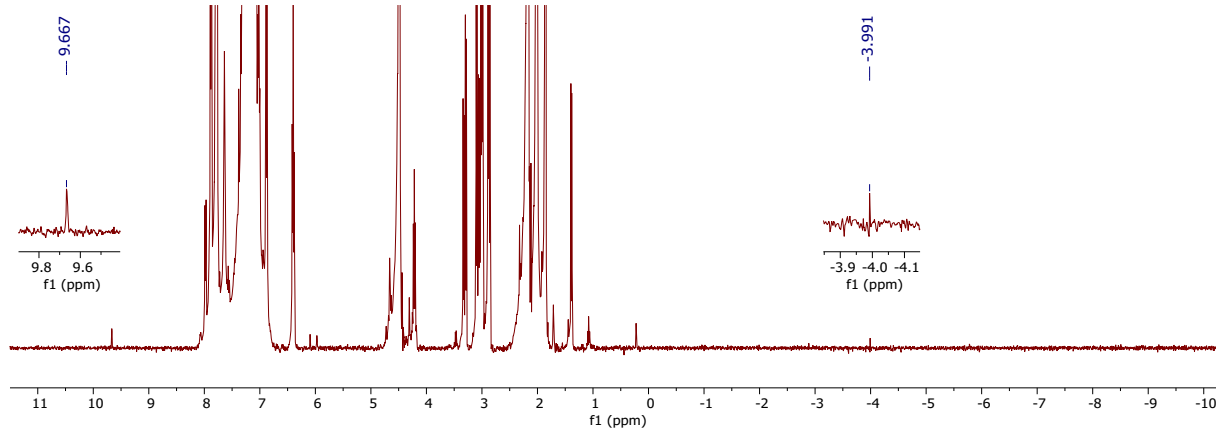

**Figure S1.** Monitoring of the reaction by  $^1\text{H}$  NMR in toluene- $d_8$

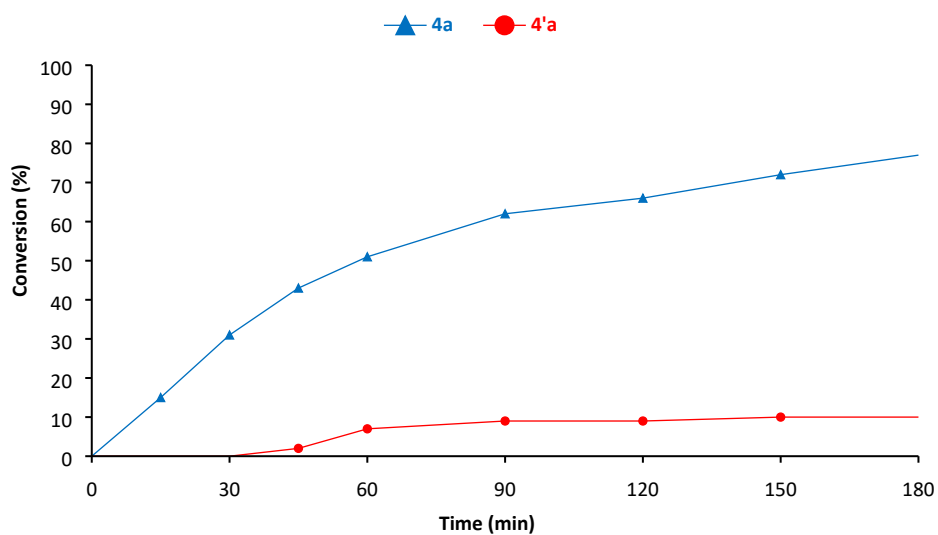

**Figure S2.** Time course of the reaction

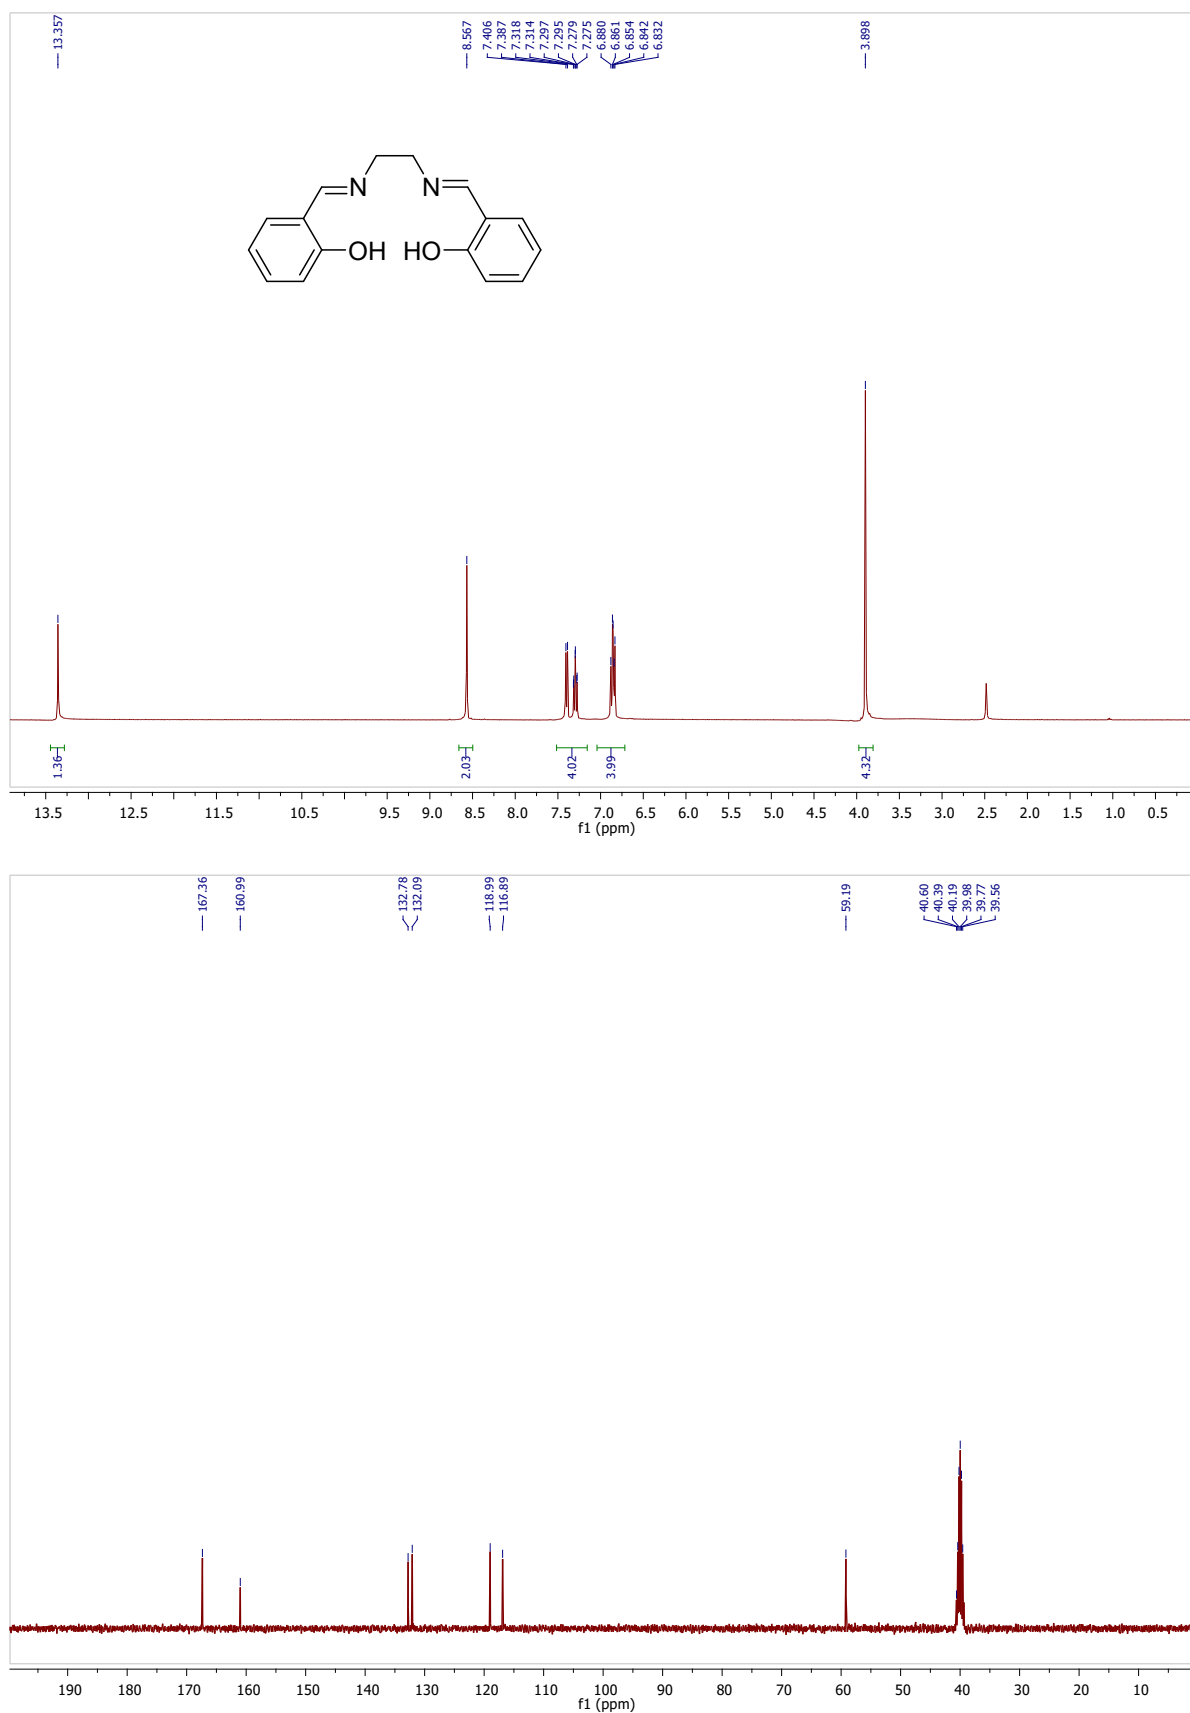

**Figure S3.** <sup>1</sup>H (400 MHz, DMSO-*d*<sub>6</sub>) and <sup>13</sup>C (100.6 MHz, DMSO-*d*<sub>6</sub>) NMR spectra of **L<sub>a</sub>**

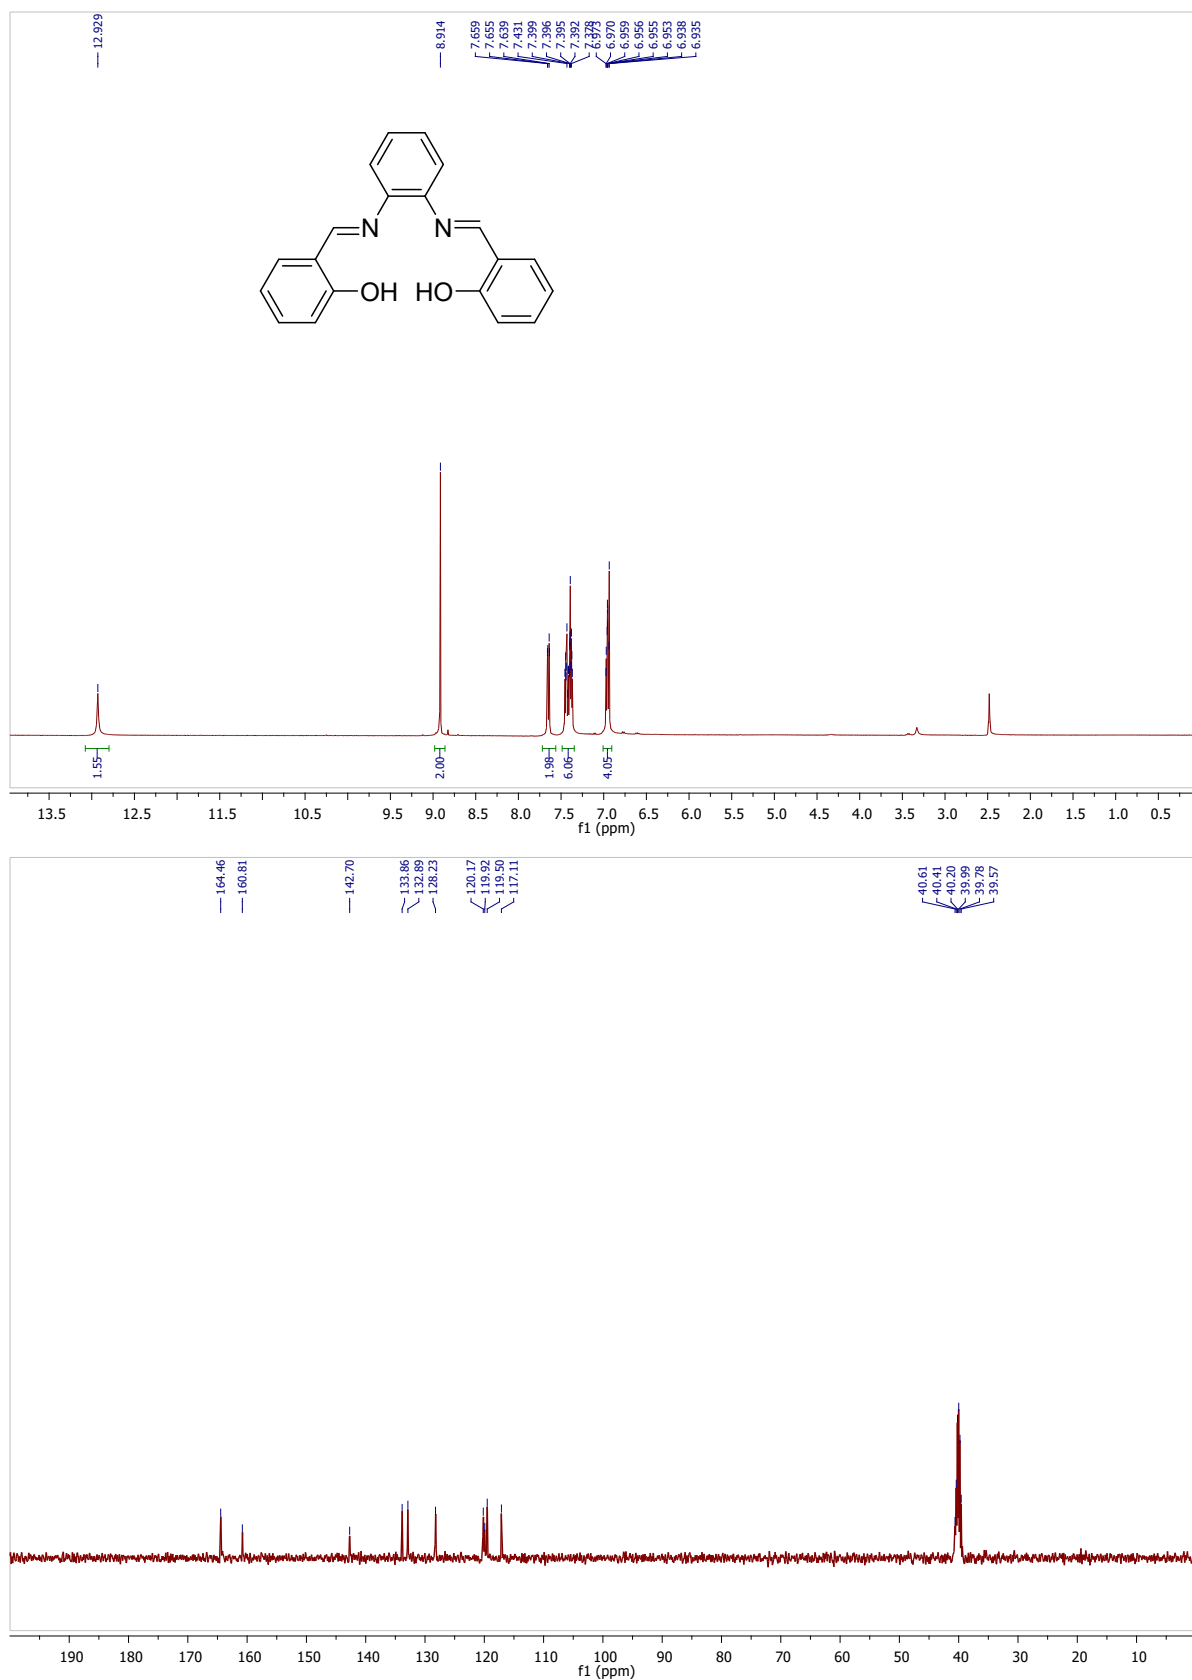

**Figure S4.** <sup>1</sup>H (400 MHz, DMSO-*d*<sub>6</sub>) and <sup>13</sup>C (100.6 MHz, DMSO-*d*<sub>6</sub>) NMR spectra of **L<sub>b</sub>**

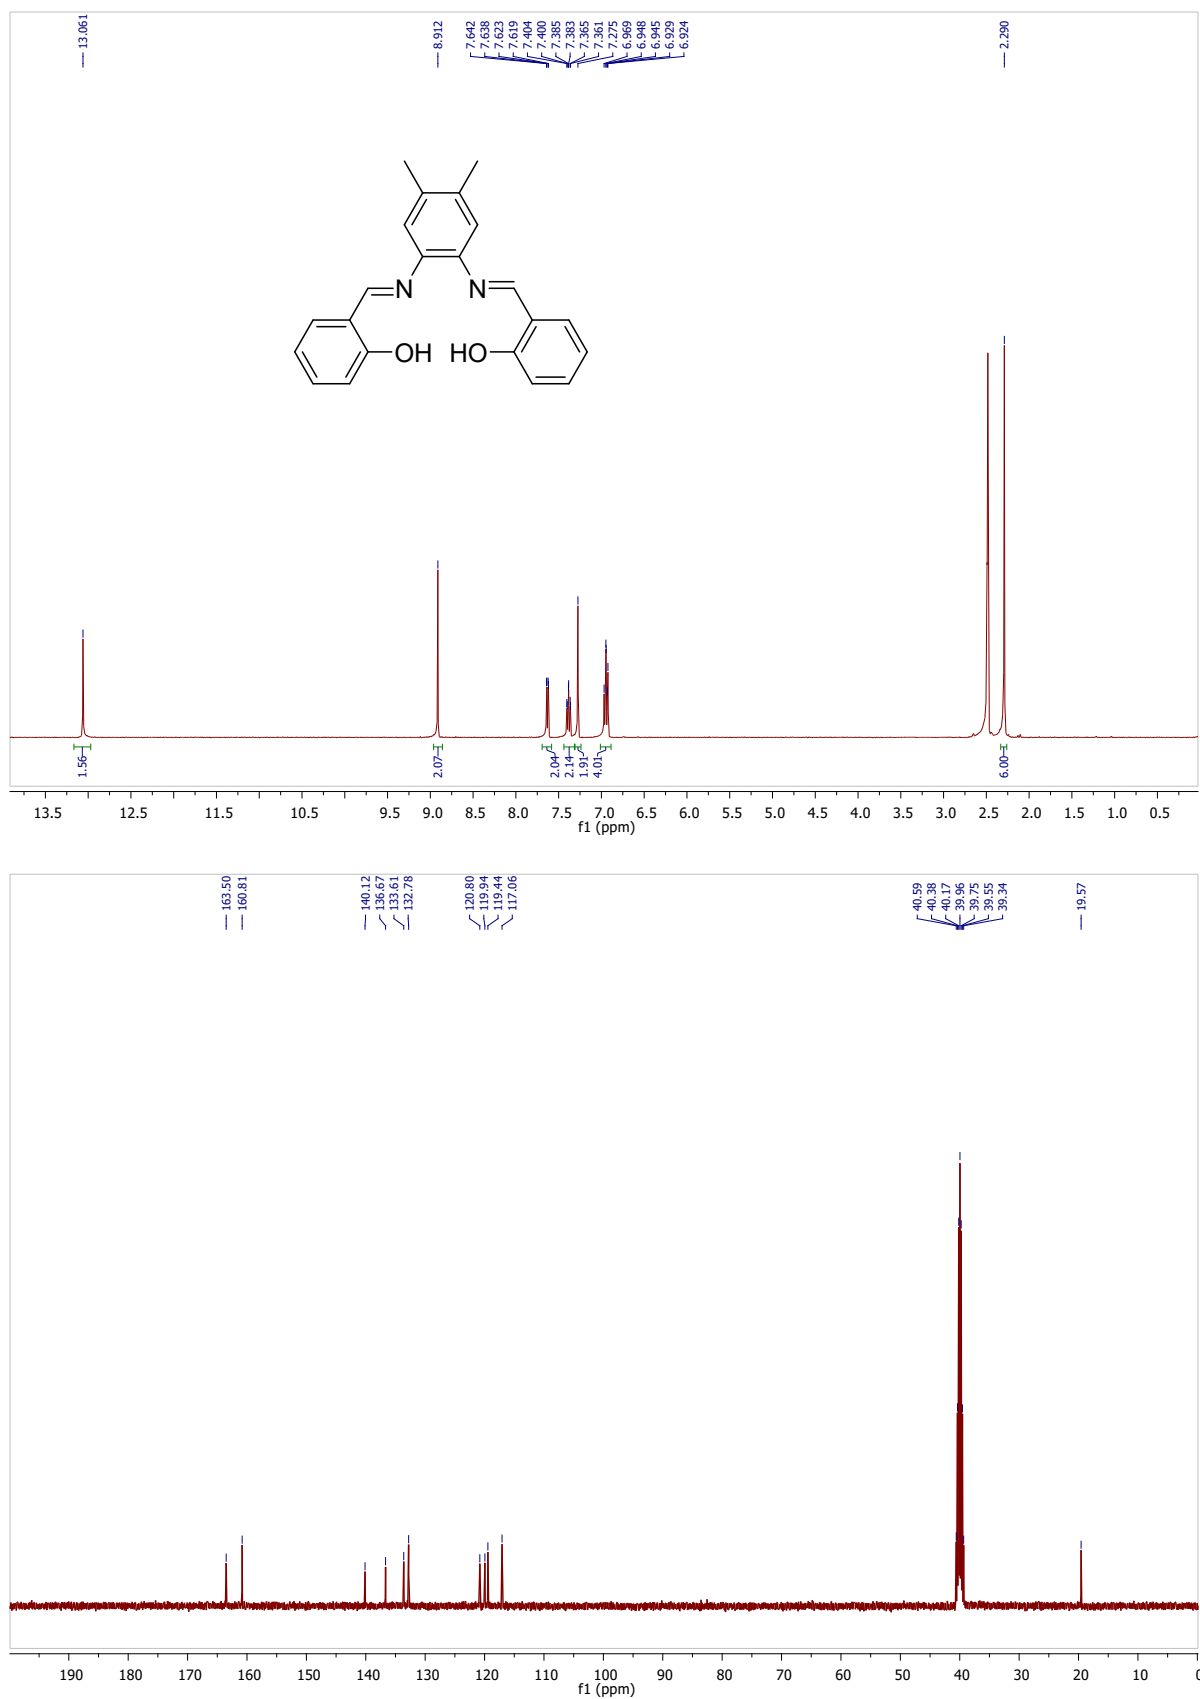

**Figure S5.** <sup>1</sup>H (400 MHz, DMSO-*d*<sub>6</sub>) and <sup>13</sup>C (100.6 MHz, DMSO-*d*<sub>6</sub>) NMR spectra of **L<sub>c</sub>**

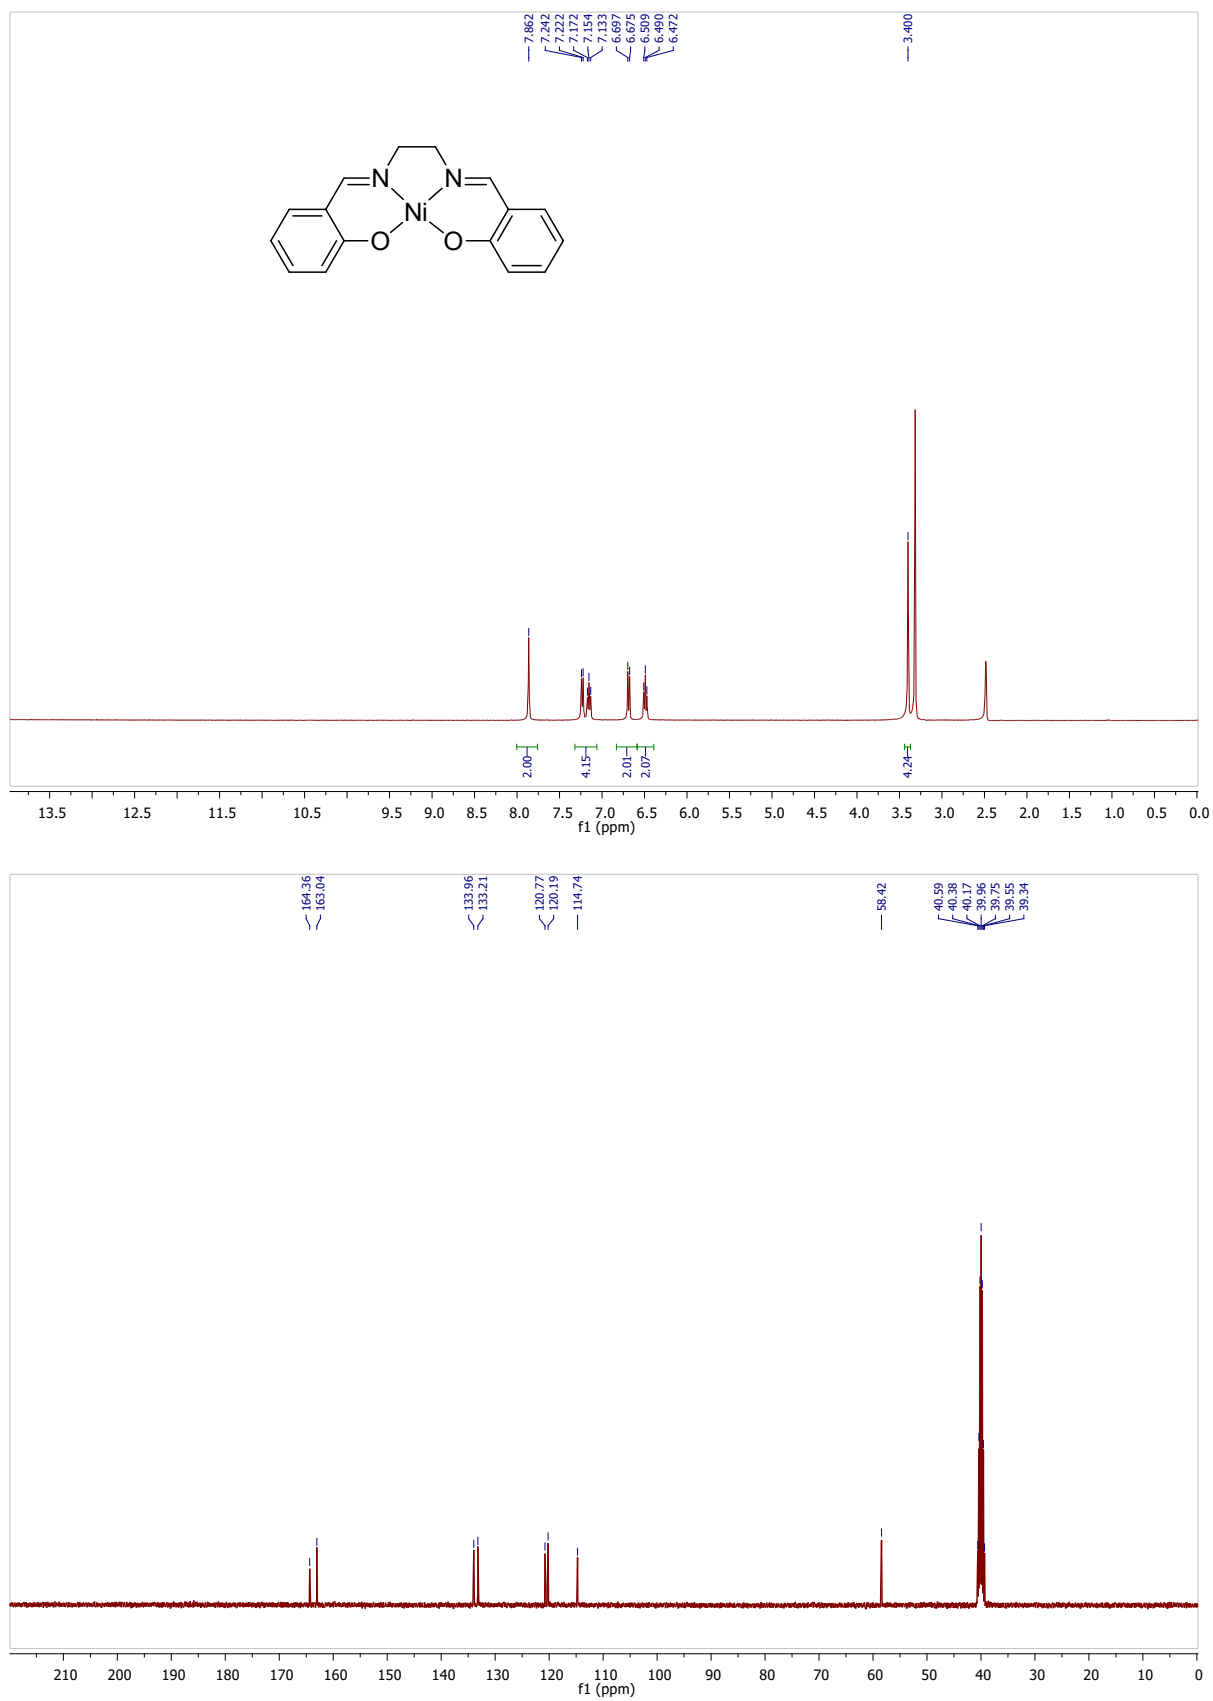

**Figure S6.** <sup>1</sup>H (400 MHz, DMSO-*d*<sub>6</sub>) and <sup>13</sup>C (100.6 MHz, DMSO-*d*<sub>6</sub>) NMR spectra of **1a**

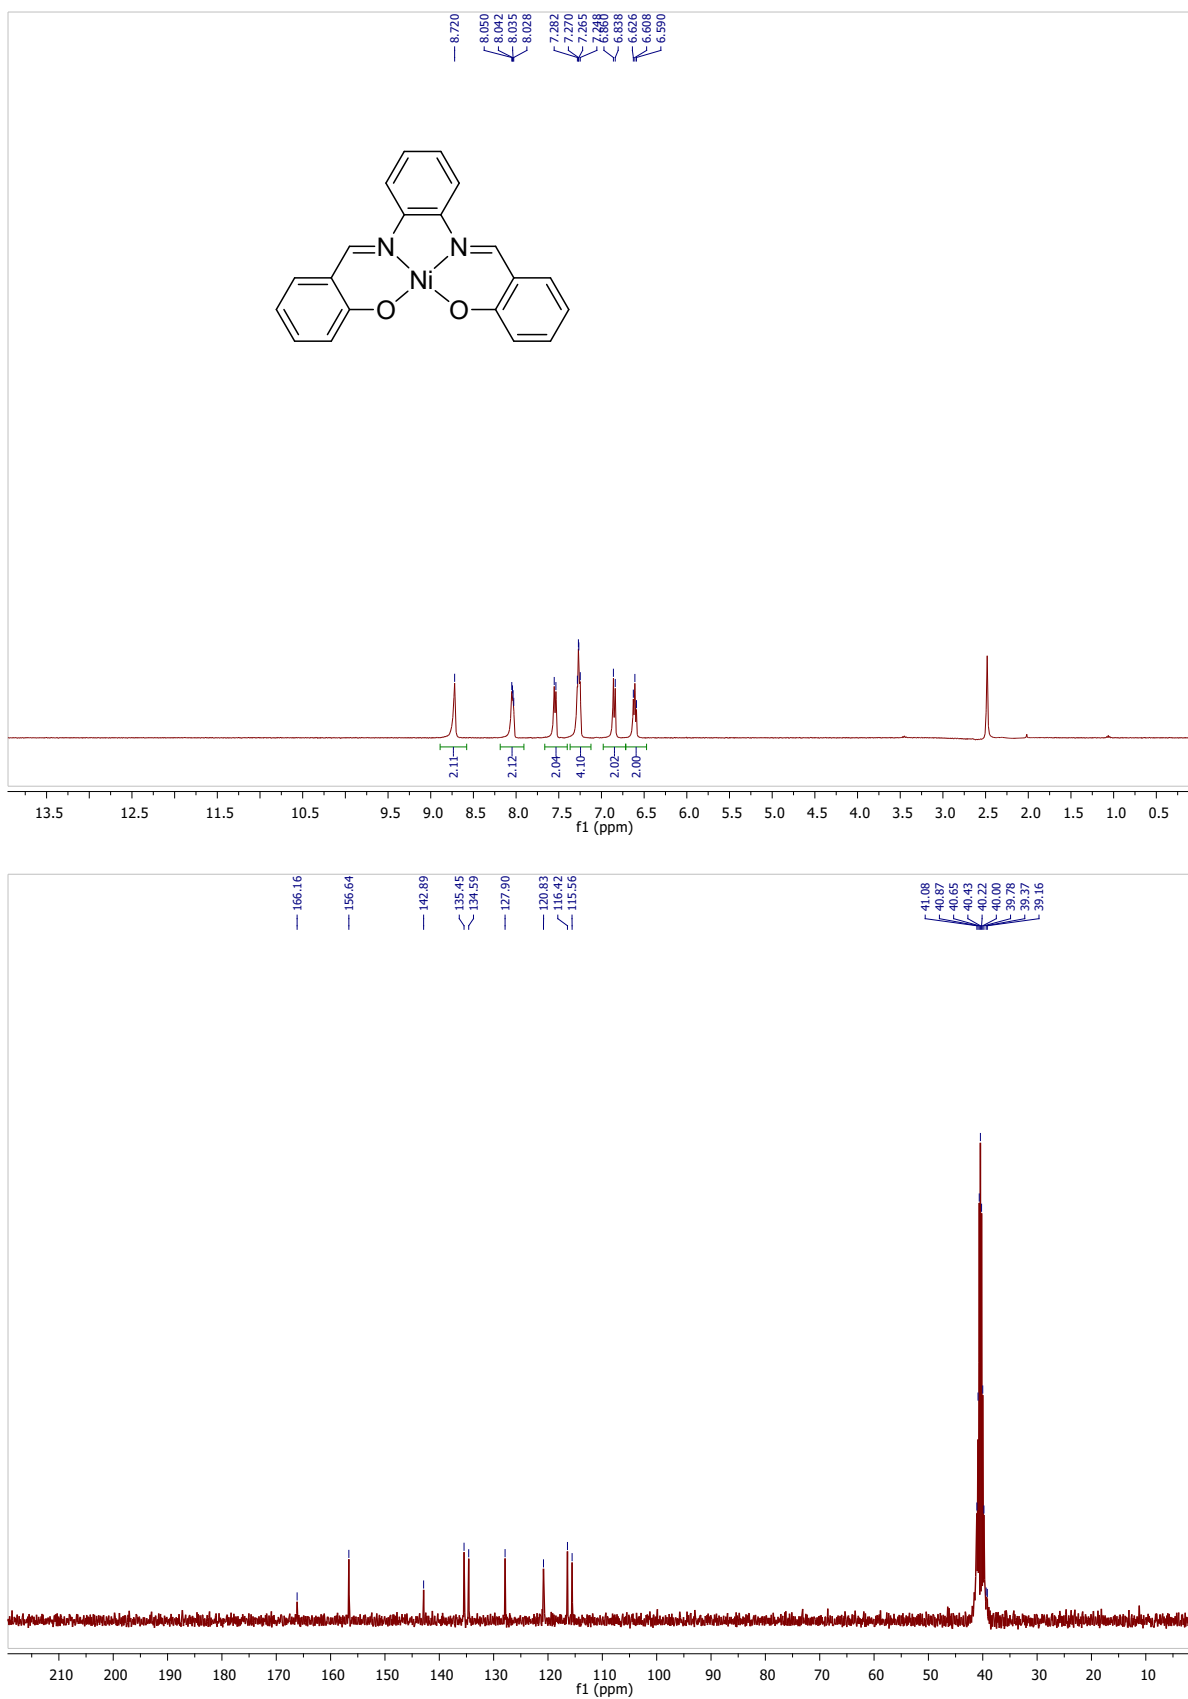

**Figure S7.**  $^1\text{H}$  (400 MHz,  $\text{DMSO-}d_6$ ) and  $^{13}\text{C}$  (100.6 MHz,  $\text{DMSO-}d_6$ ) NMR spectra of **1b**

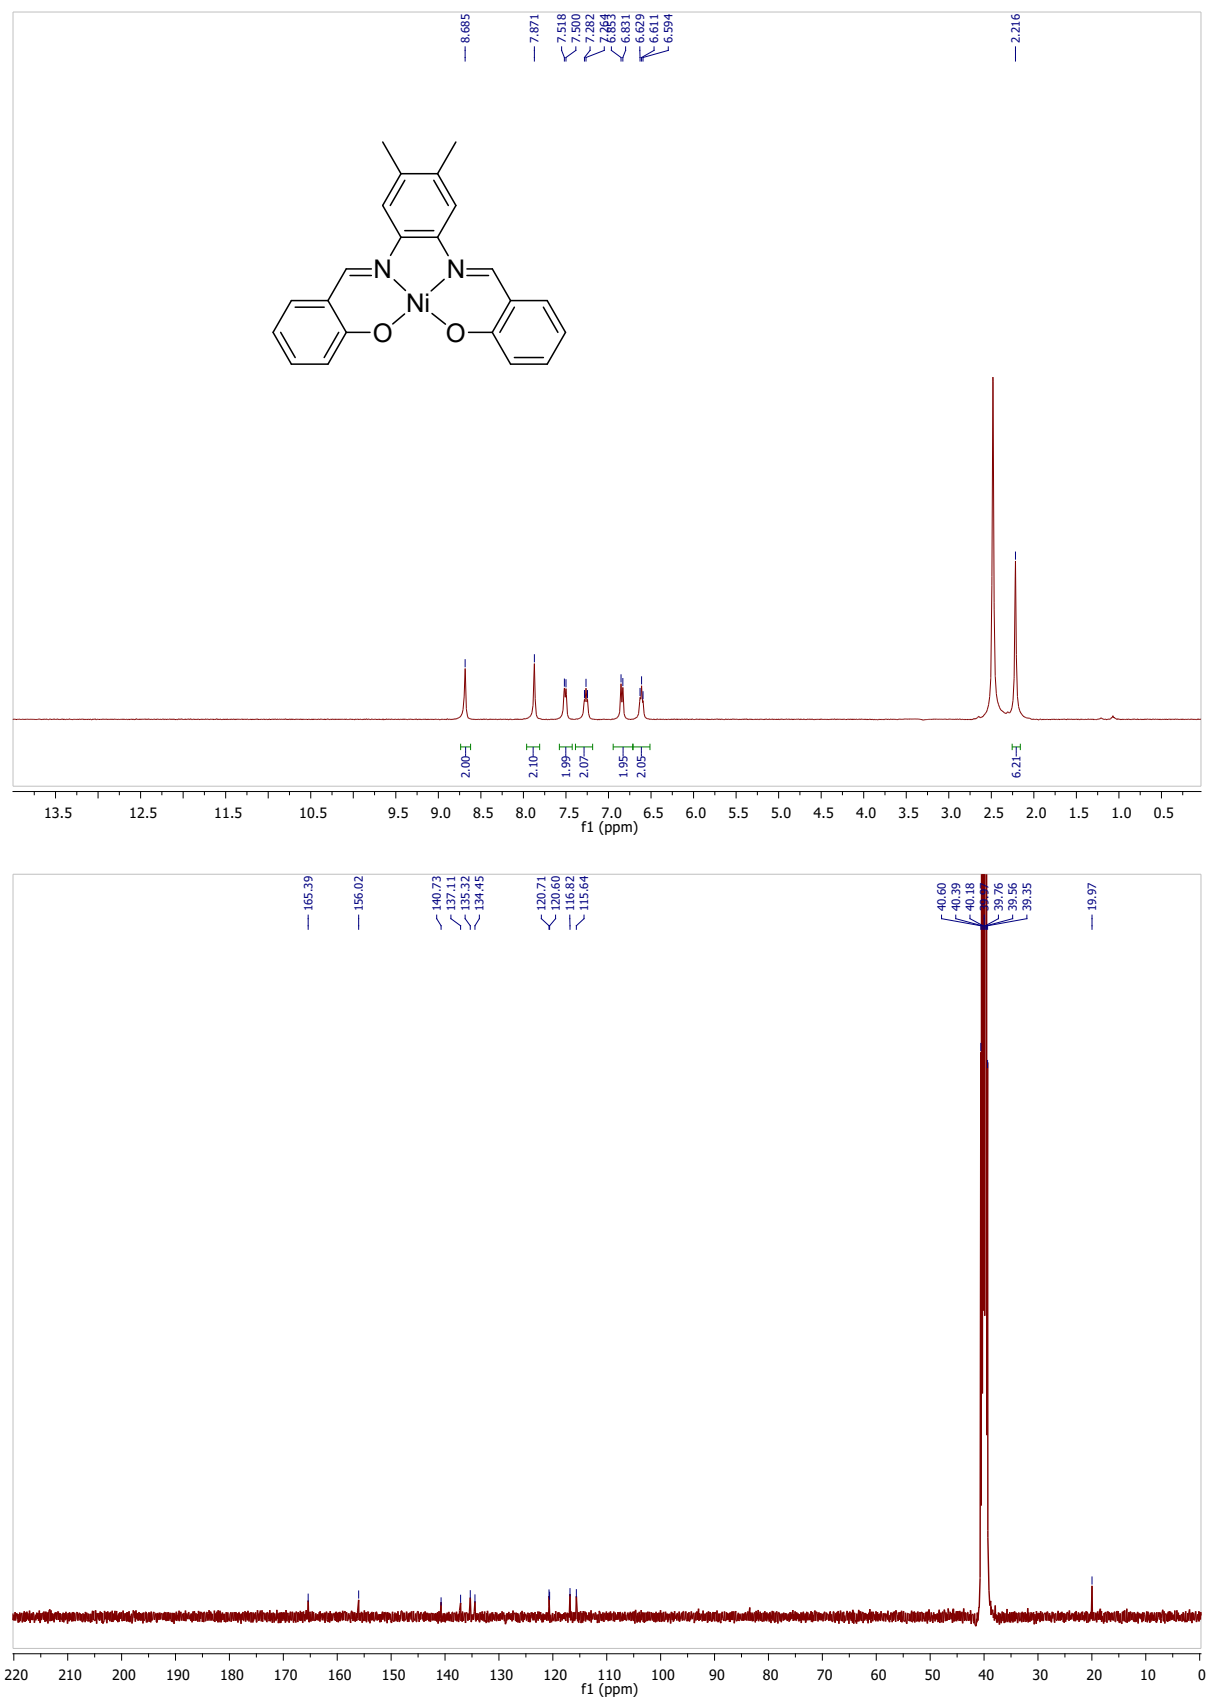

**Figure S8.** <sup>1</sup>H (400 MHz, DMSO-*d*<sub>6</sub>) and <sup>13</sup>C (100.6 MHz, DMSO-*d*<sub>6</sub>) NMR spectra of **1c**



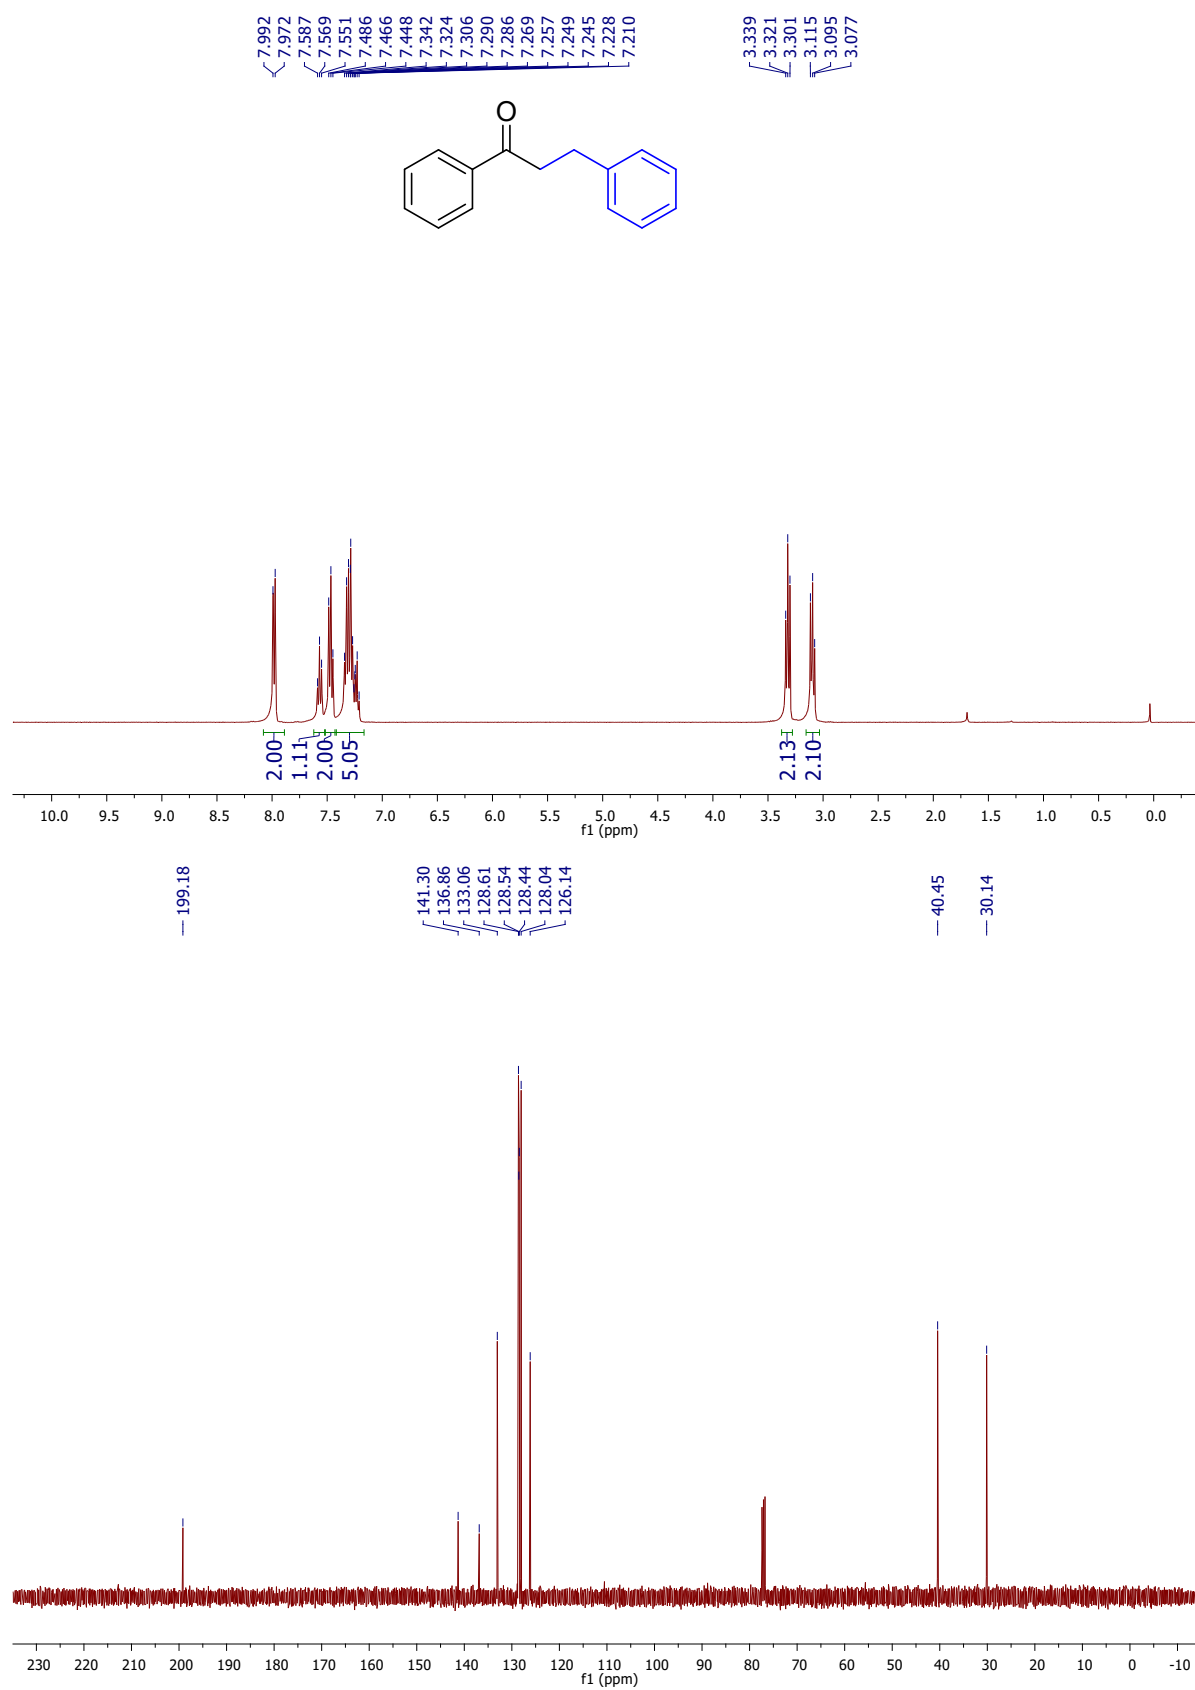

**Figure S9.** <sup>1</sup>H (400 MHz, CDCl<sub>3</sub>) and <sup>13</sup>C (100.6 MHz, CDCl<sub>3</sub>) NMR spectra of **4a**

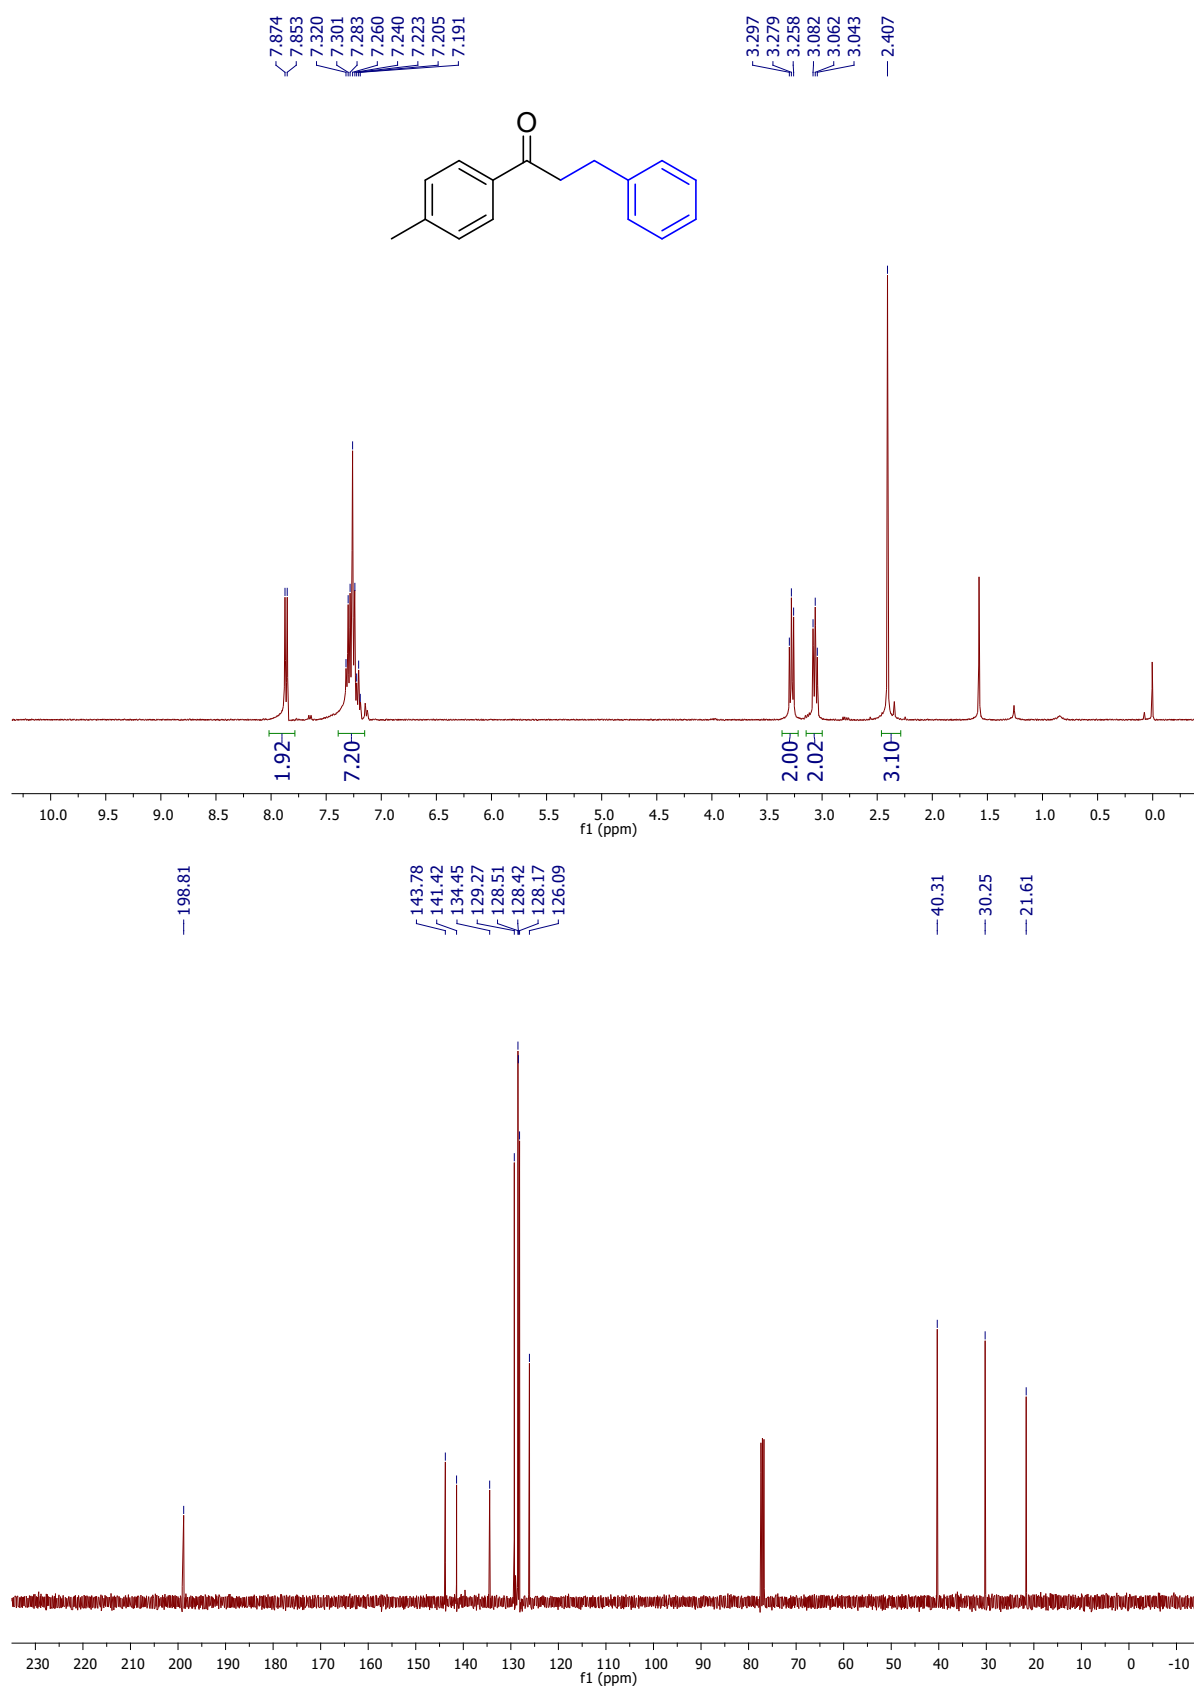

**Figure S10.** <sup>1</sup>H (400 MHz, CDCl<sub>3</sub>) and <sup>13</sup>C (100.6 MHz, CDCl<sub>3</sub>) NMR spectra of **4b**

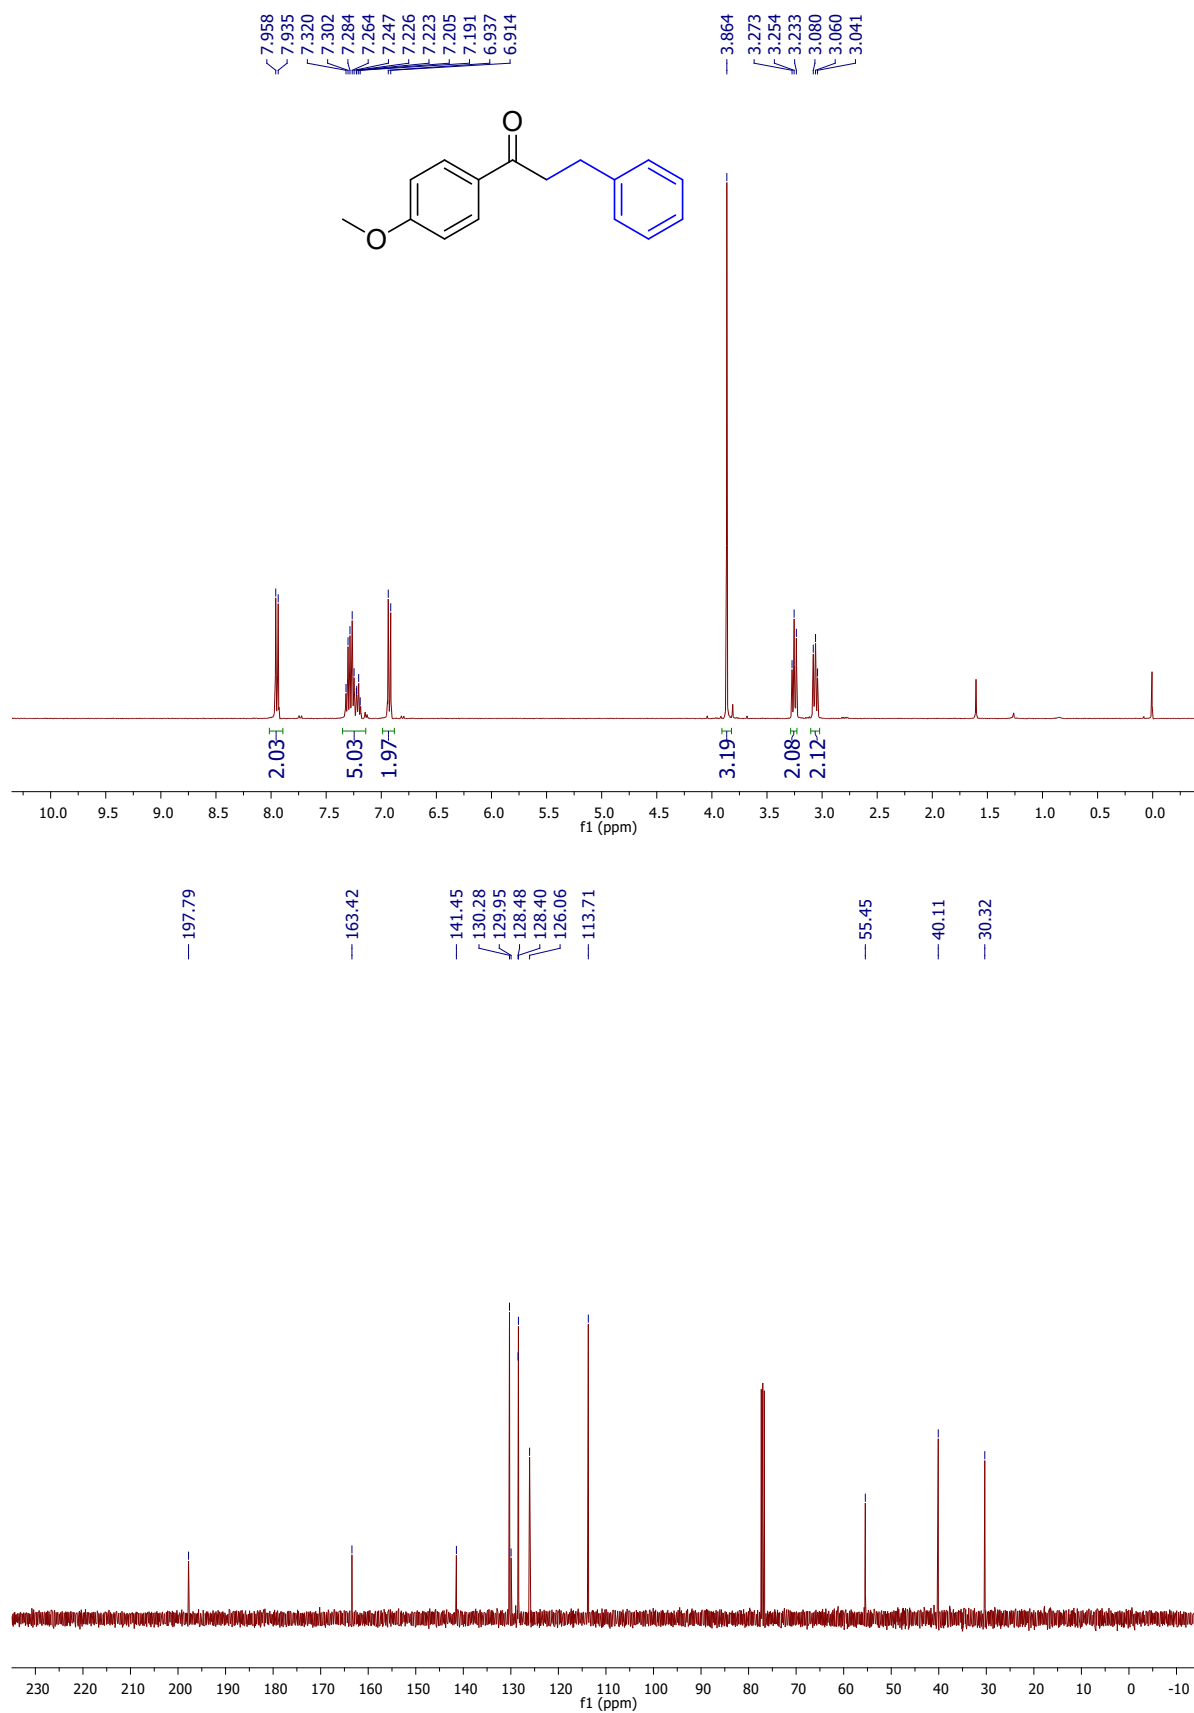

**Figure S11.** <sup>1</sup>H (400 MHz, CDCl<sub>3</sub>) and <sup>13</sup>C (100.6 MHz, CDCl<sub>3</sub>) NMR spectra of **4c**

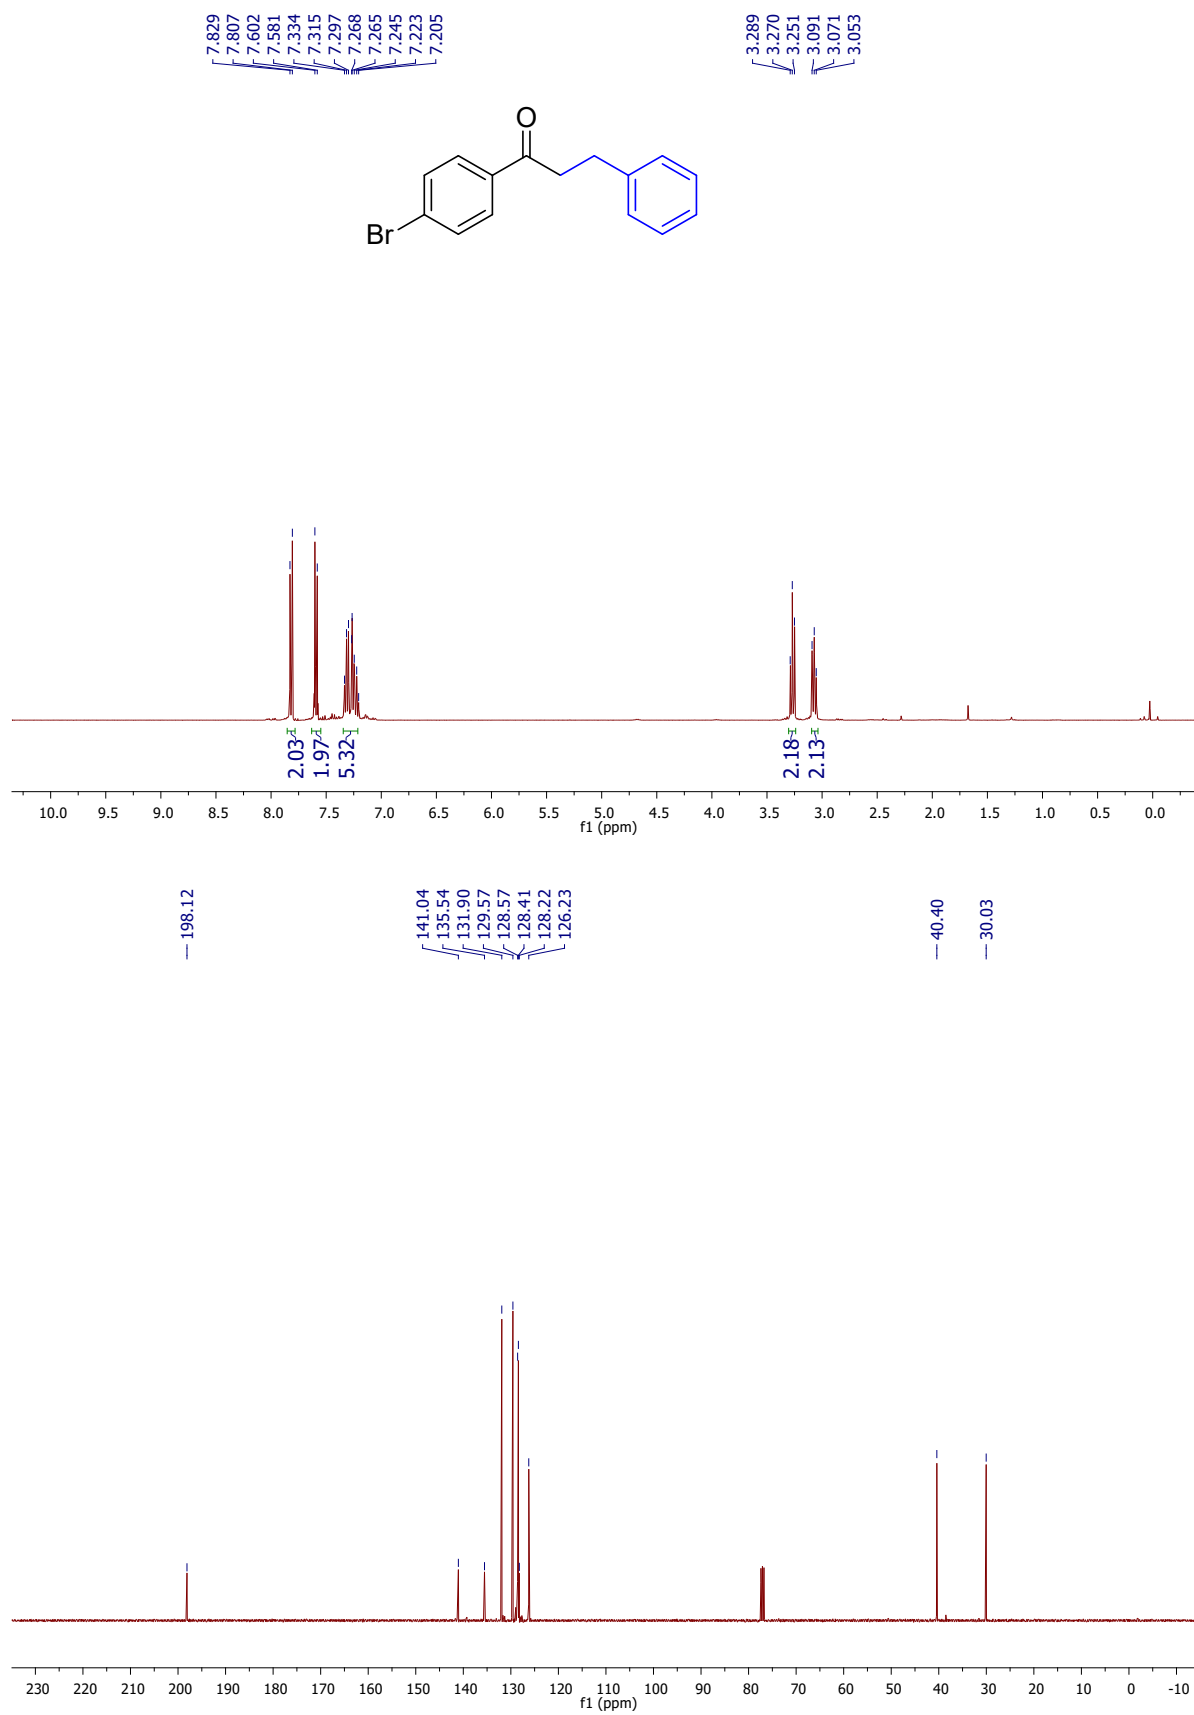

**Figure S12.** <sup>1</sup>H (400 MHz, CDCl<sub>3</sub>) and <sup>13</sup>C (100.6 MHz, CDCl<sub>3</sub>) NMR spectra of **4d**

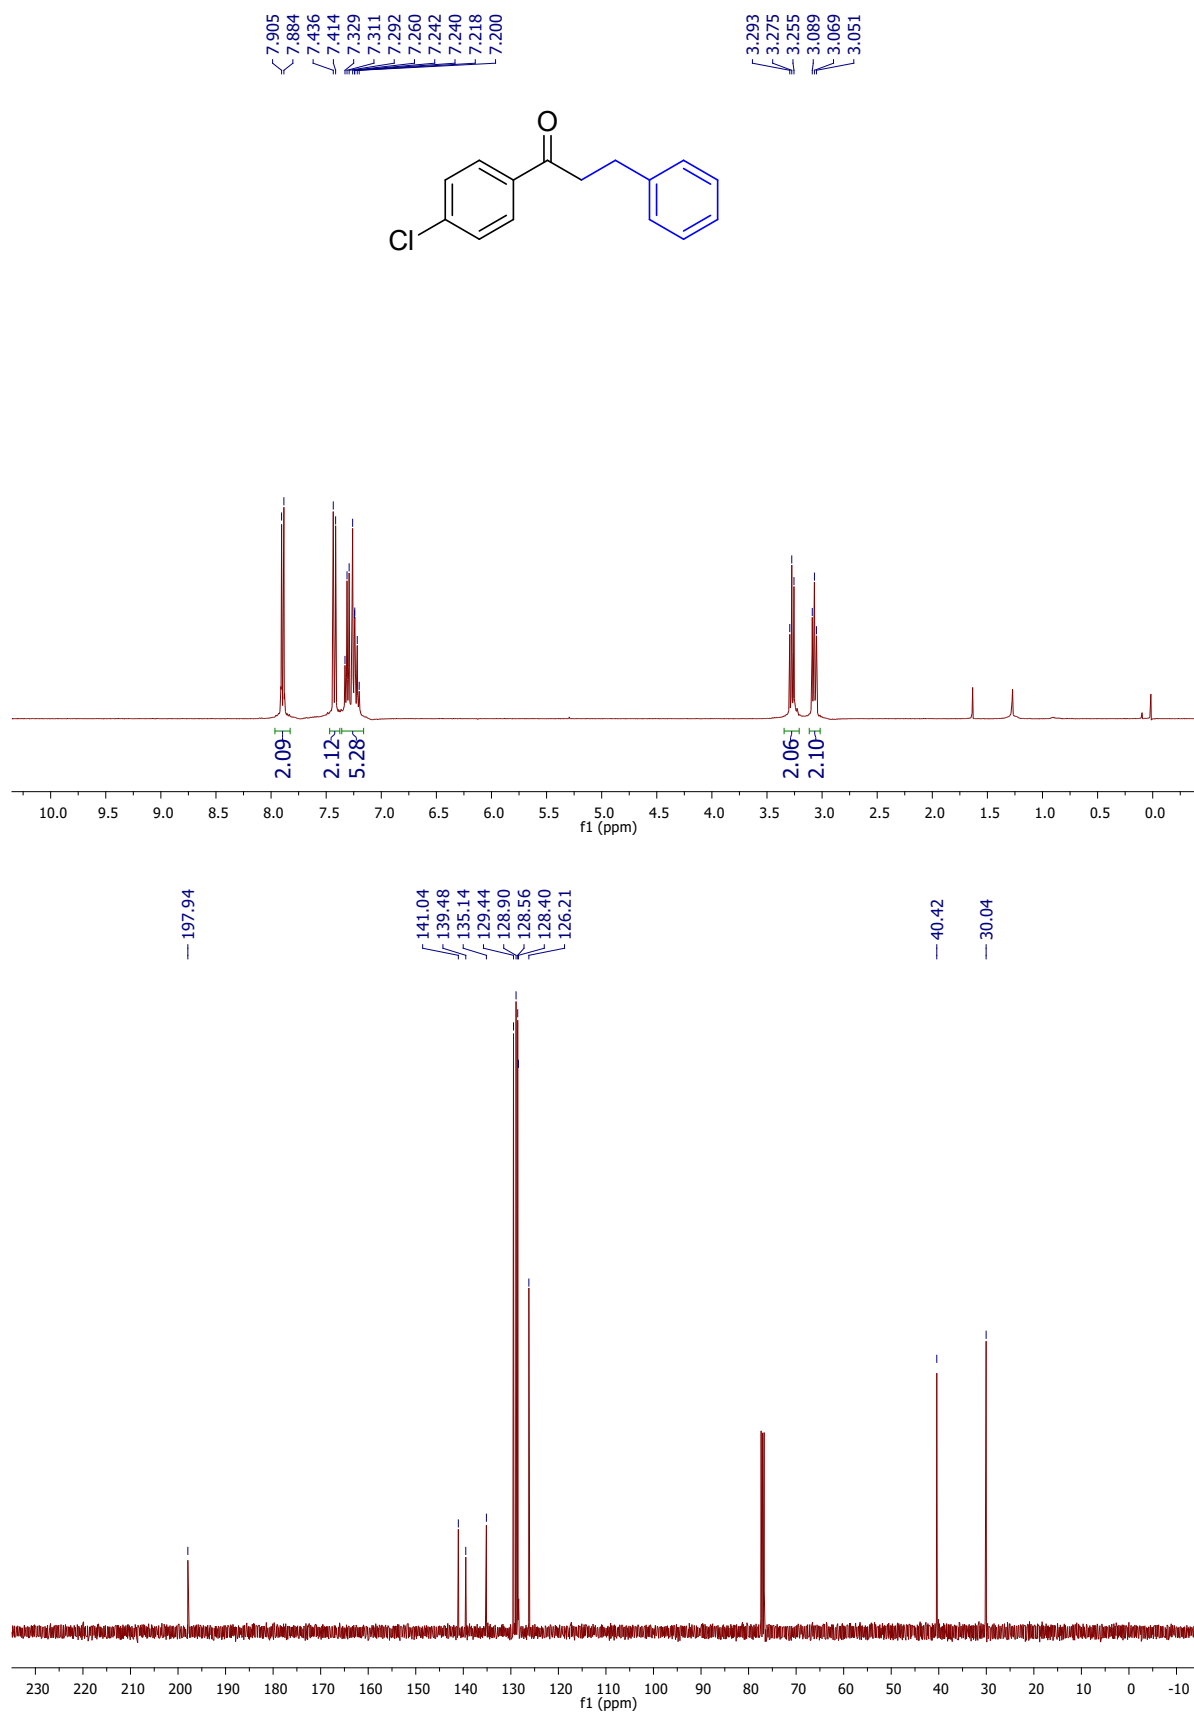

**Figure S13.** <sup>1</sup>H (400 MHz, CDCl<sub>3</sub>) and <sup>13</sup>C (100.6 MHz, CDCl<sub>3</sub>) NMR spectra of **4e**

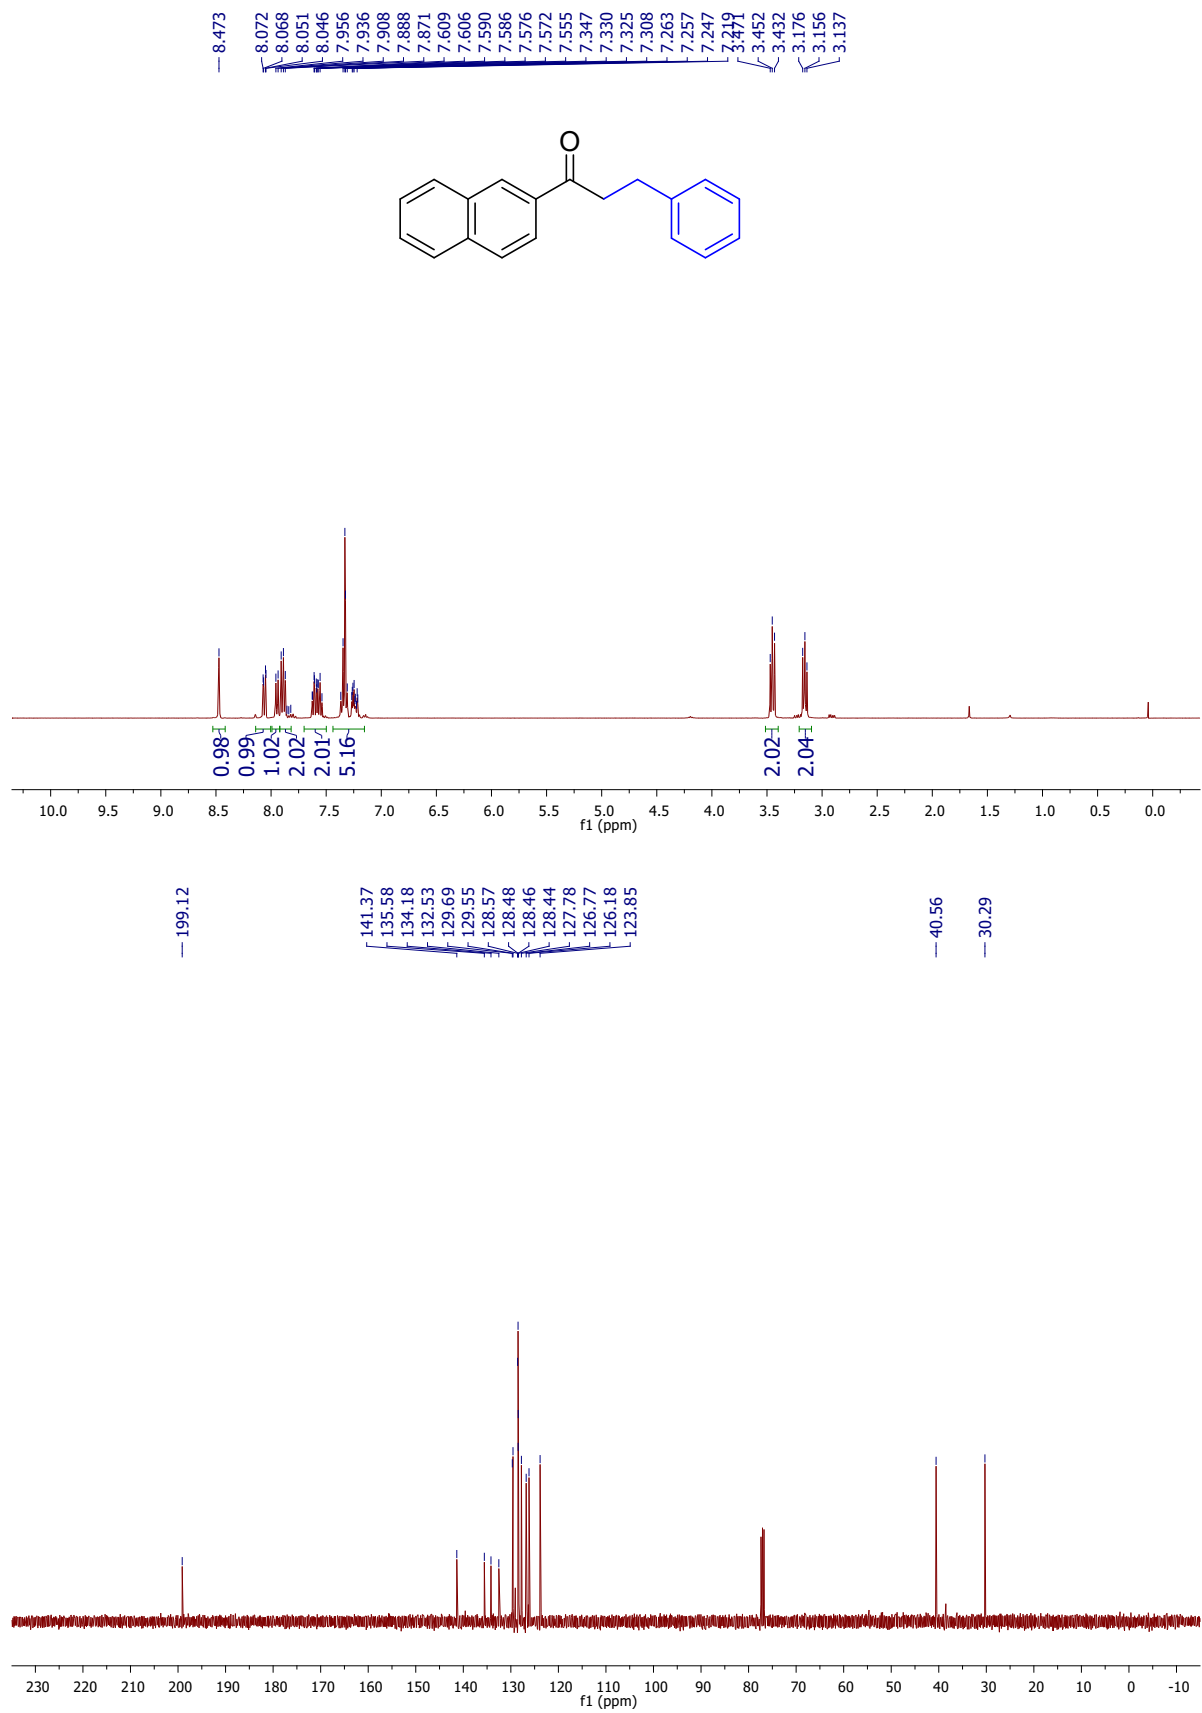

**Figure S14.** <sup>1</sup>H (400 MHz, CDCl<sub>3</sub>) and <sup>13</sup>C (100.6 MHz, CDCl<sub>3</sub>) NMR spectra of **4f**

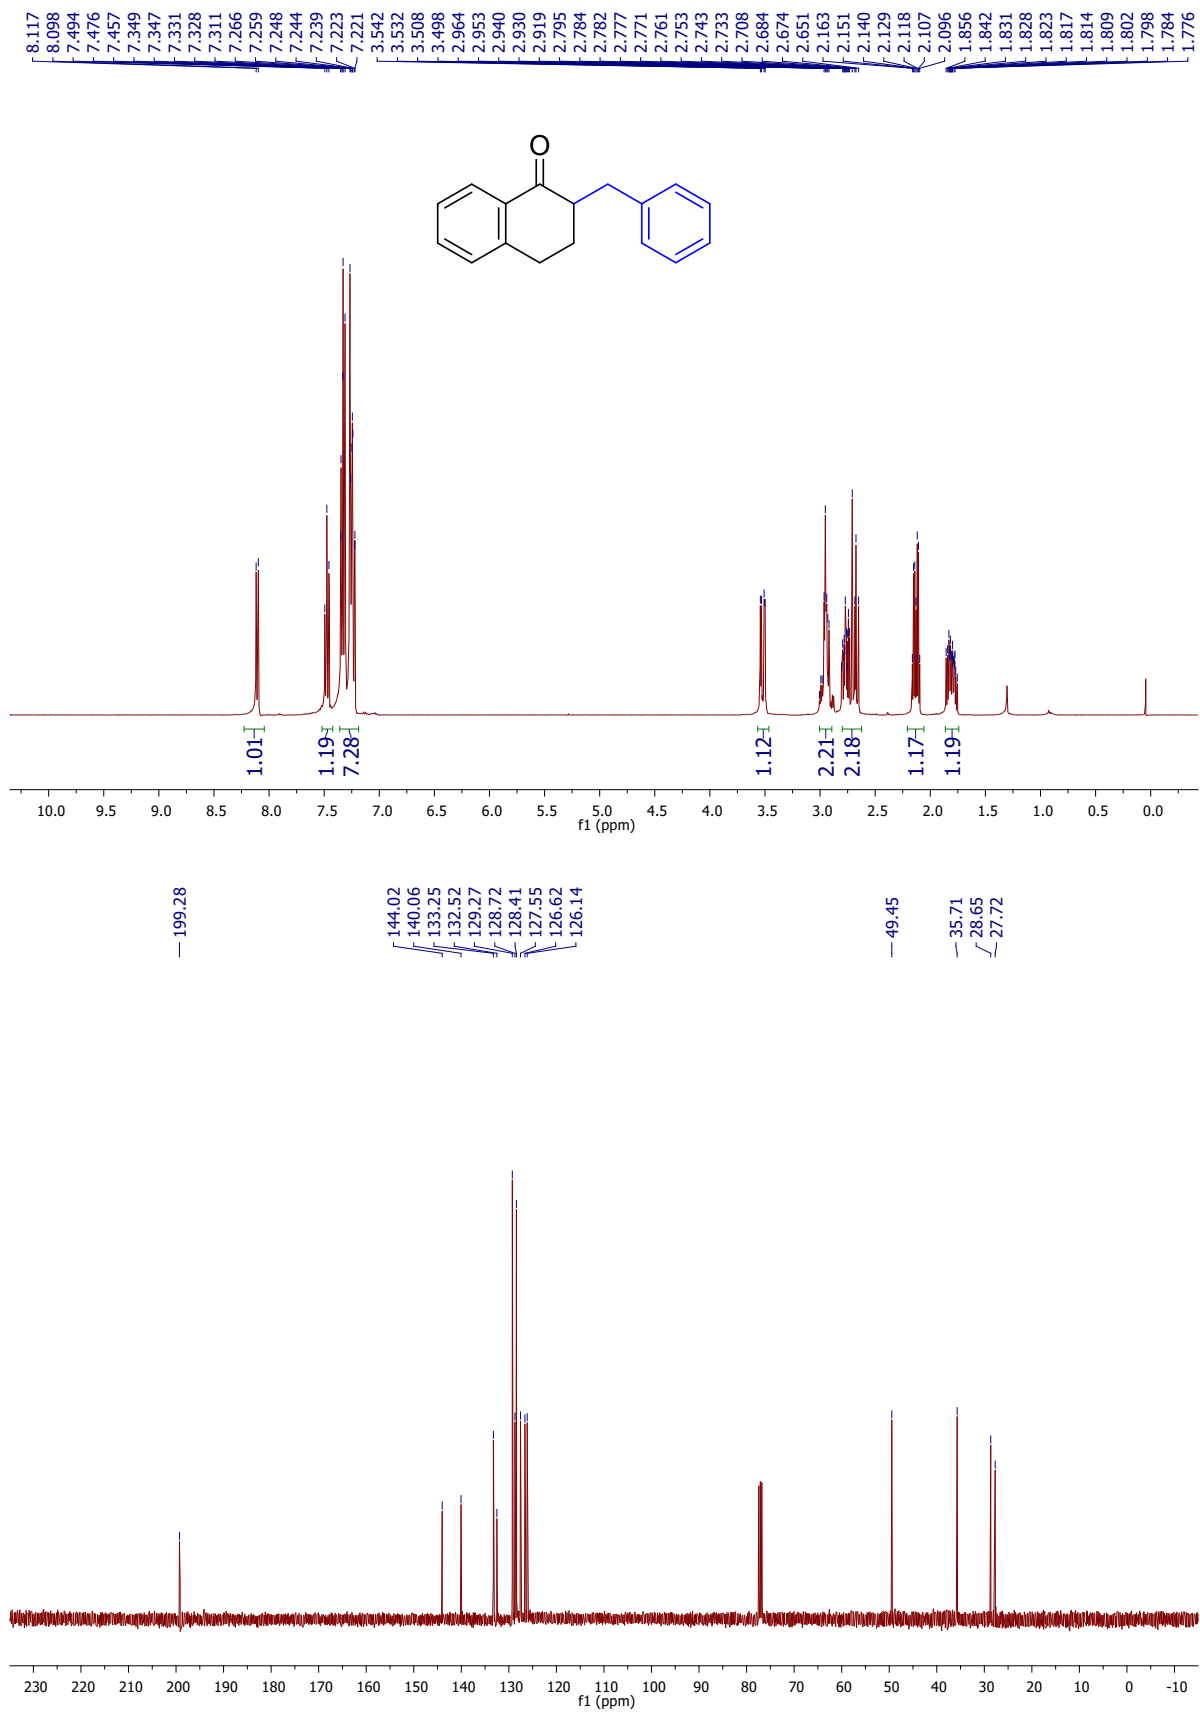

**Figure S15.** <sup>1</sup>H (400 MHz, CDCl<sub>3</sub>) and <sup>13</sup>C (100.6 MHz, CDCl<sub>3</sub>) NMR spectra of **4g**

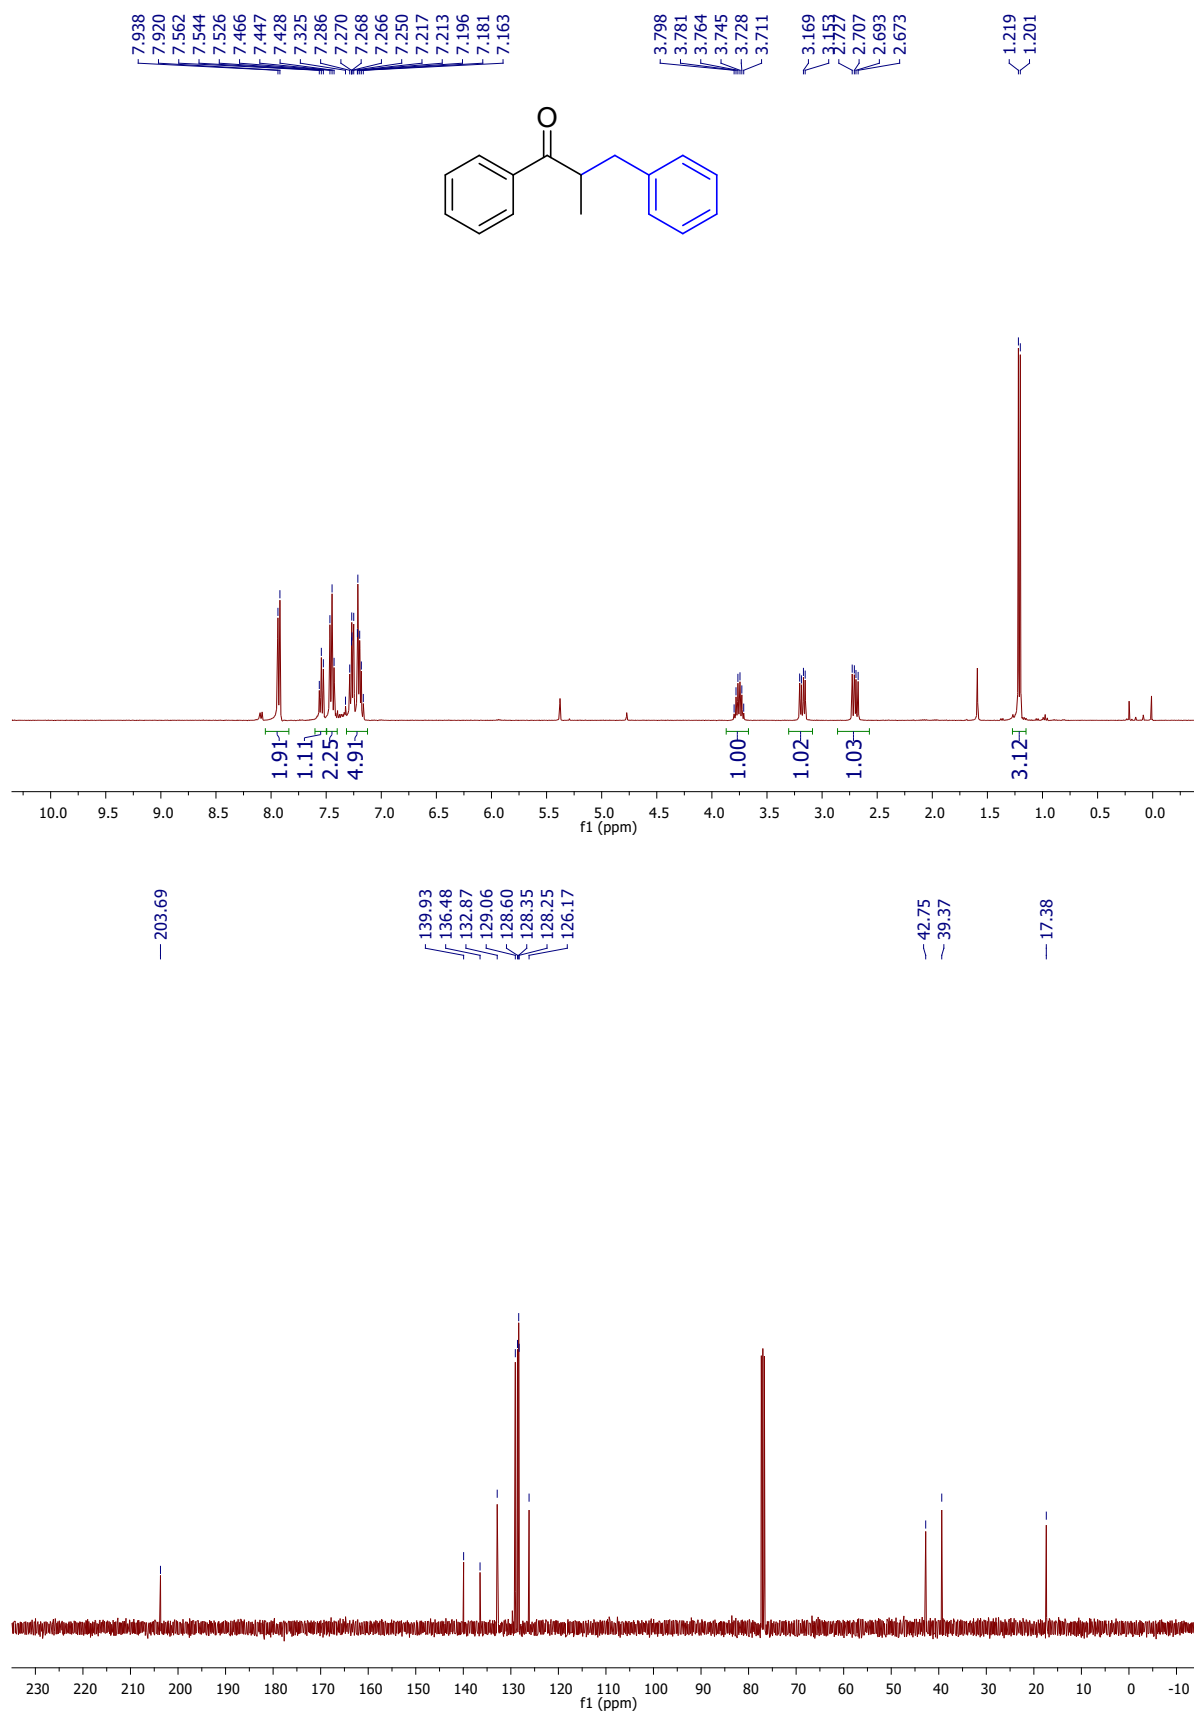

**Figure S16.** <sup>1</sup>H (400 MHz, CDCl<sub>3</sub>) and <sup>13</sup>C (100.6 MHz, CDCl<sub>3</sub>) NMR spectra of **4h**



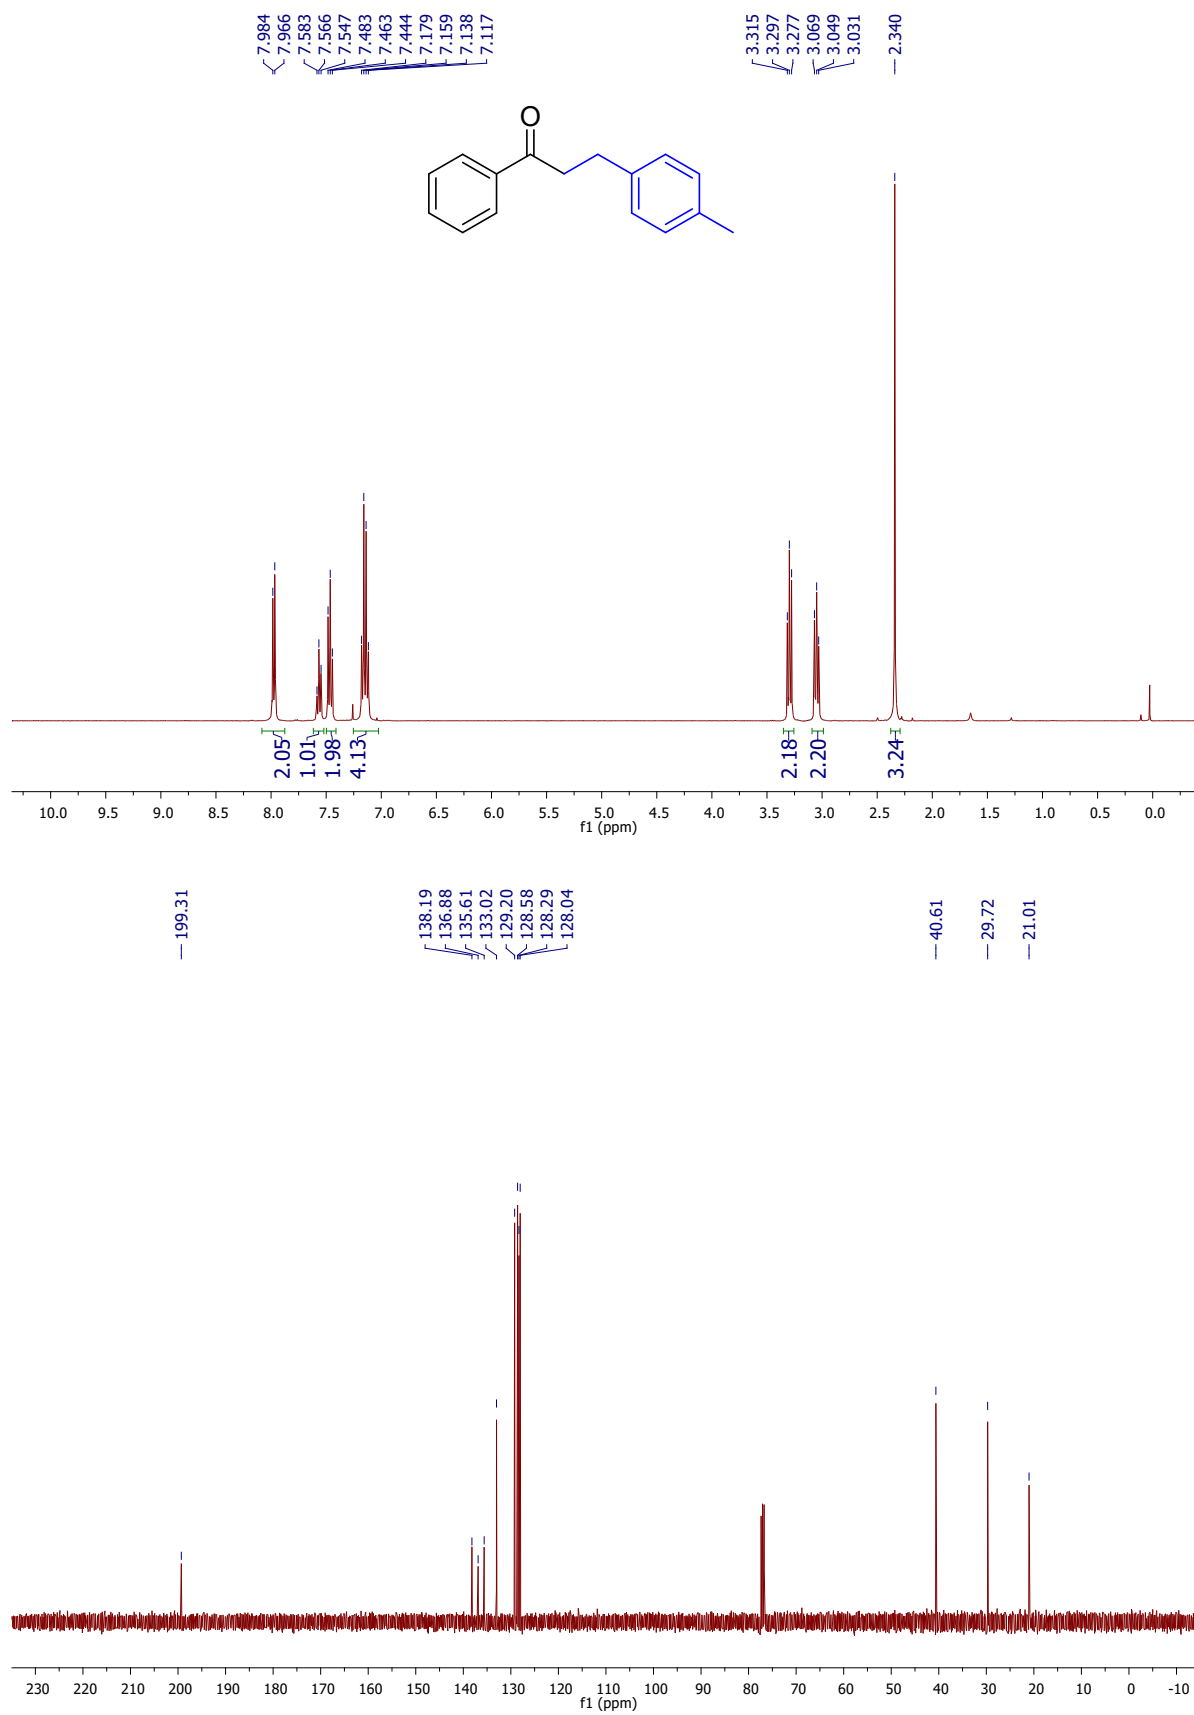

**Figure S17.** <sup>1</sup>H (400 MHz, CDCl<sub>3</sub>) and <sup>13</sup>C (100.6 MHz, CDCl<sub>3</sub>) NMR spectra of **4i**

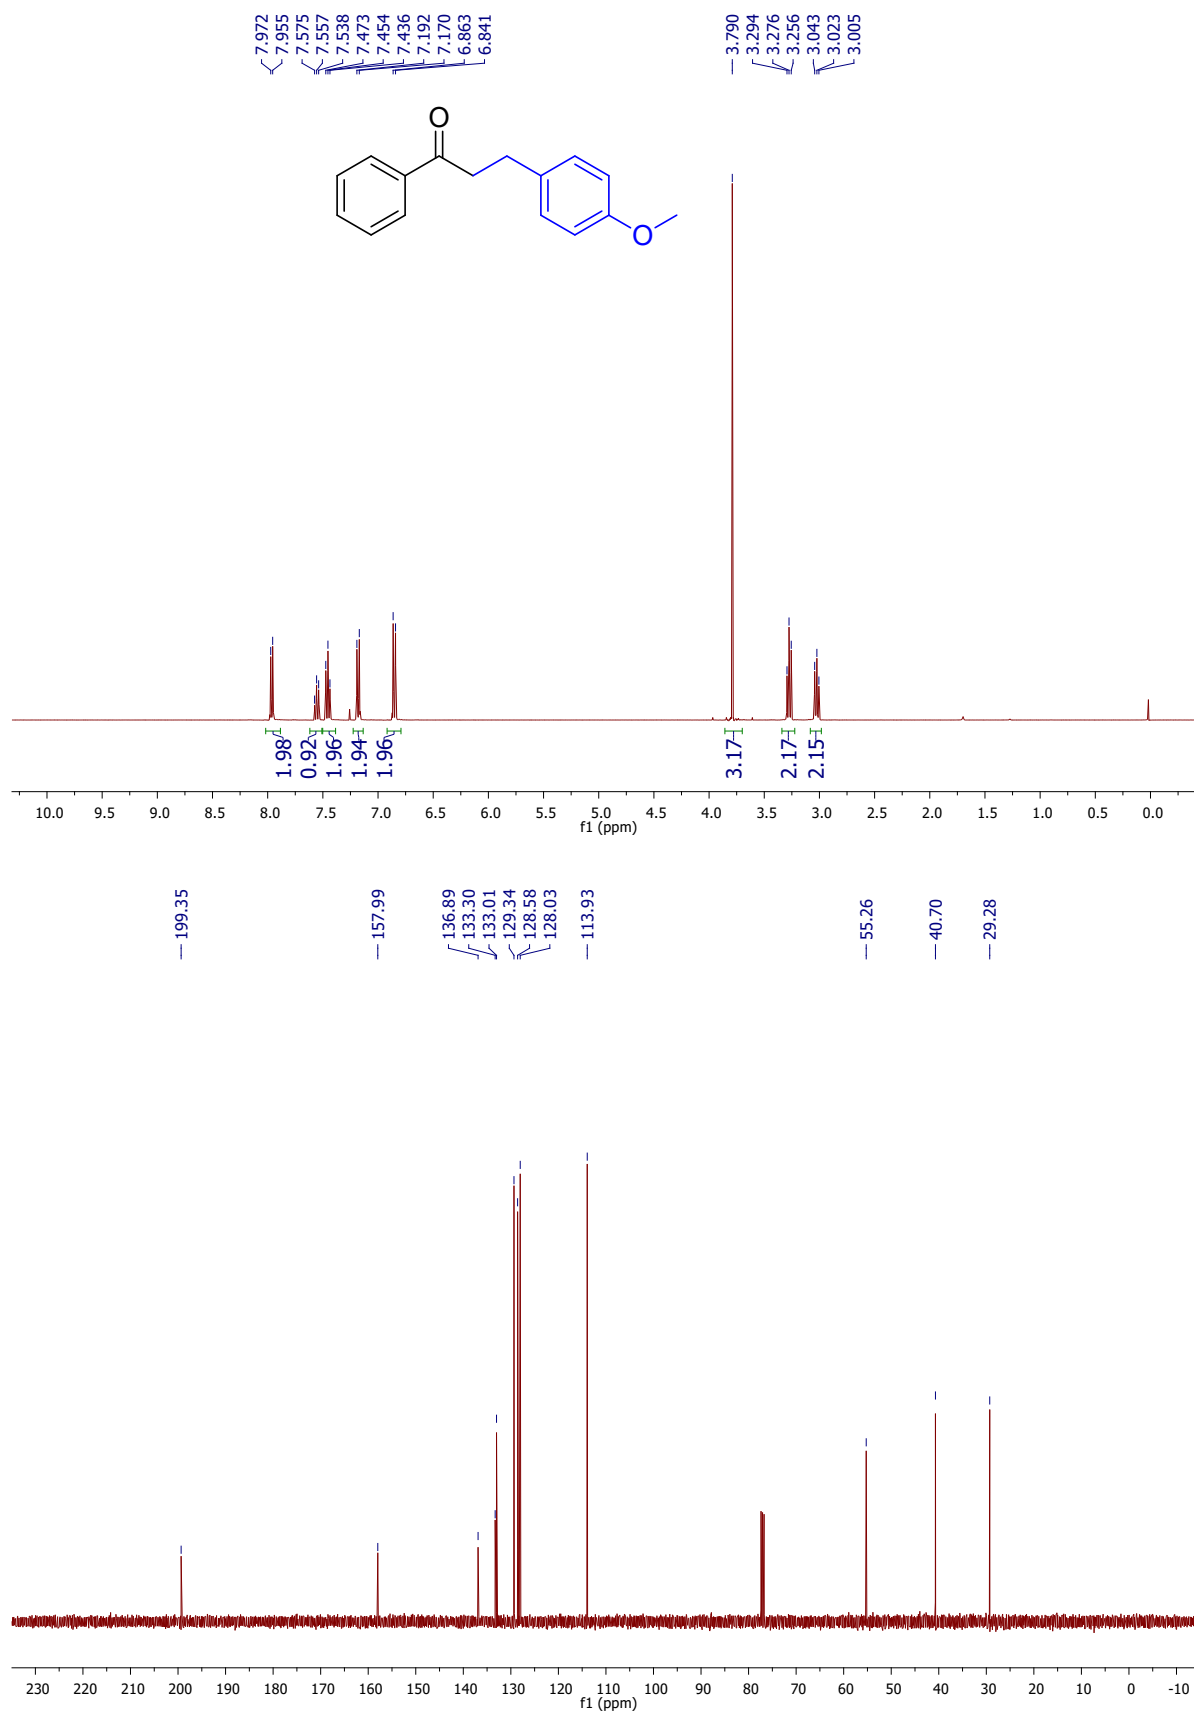

**Figure S18.** <sup>1</sup>H (400 MHz, CDCl<sub>3</sub>) and <sup>13</sup>C (100.6 MHz, CDCl<sub>3</sub>) NMR spectra of **4j**

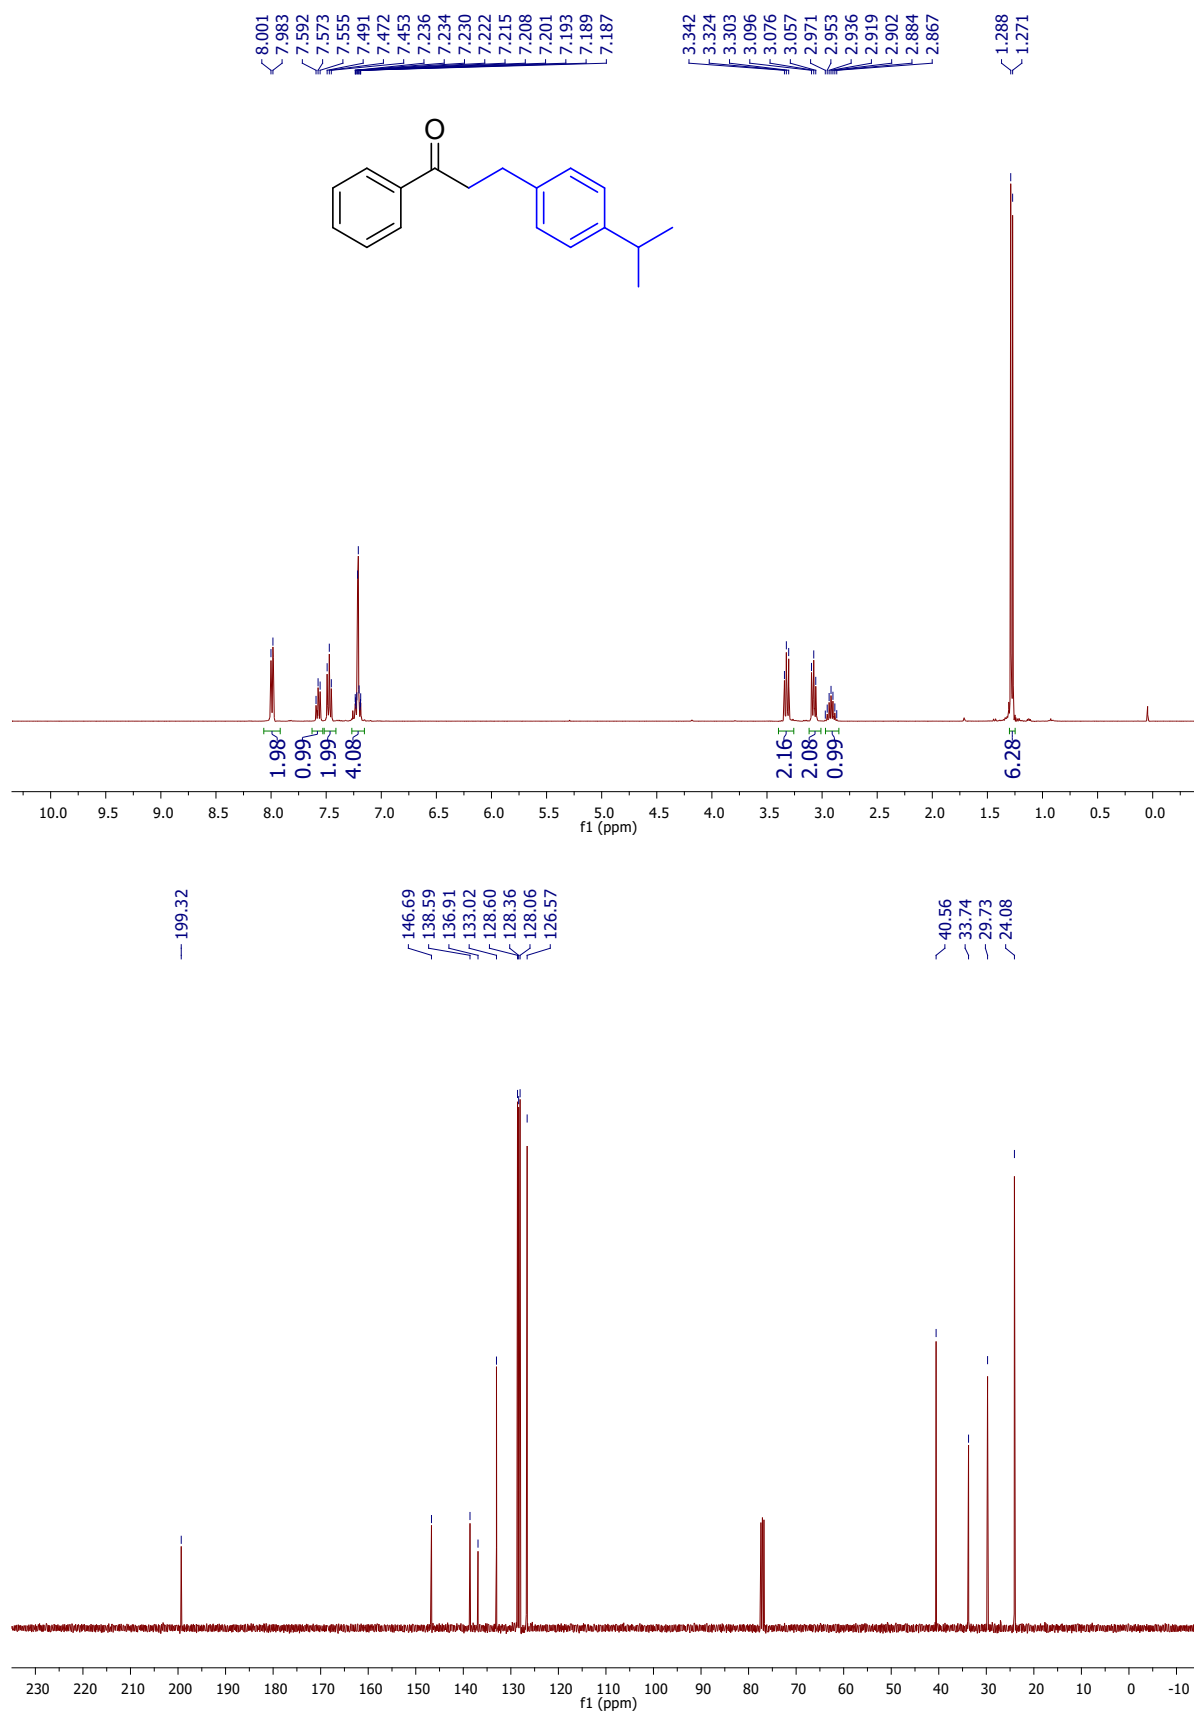

**Figure S19.** <sup>1</sup>H (400 MHz, CDCl<sub>3</sub>) and <sup>13</sup>C (100.6 MHz, CDCl<sub>3</sub>) NMR spectra of **4k**

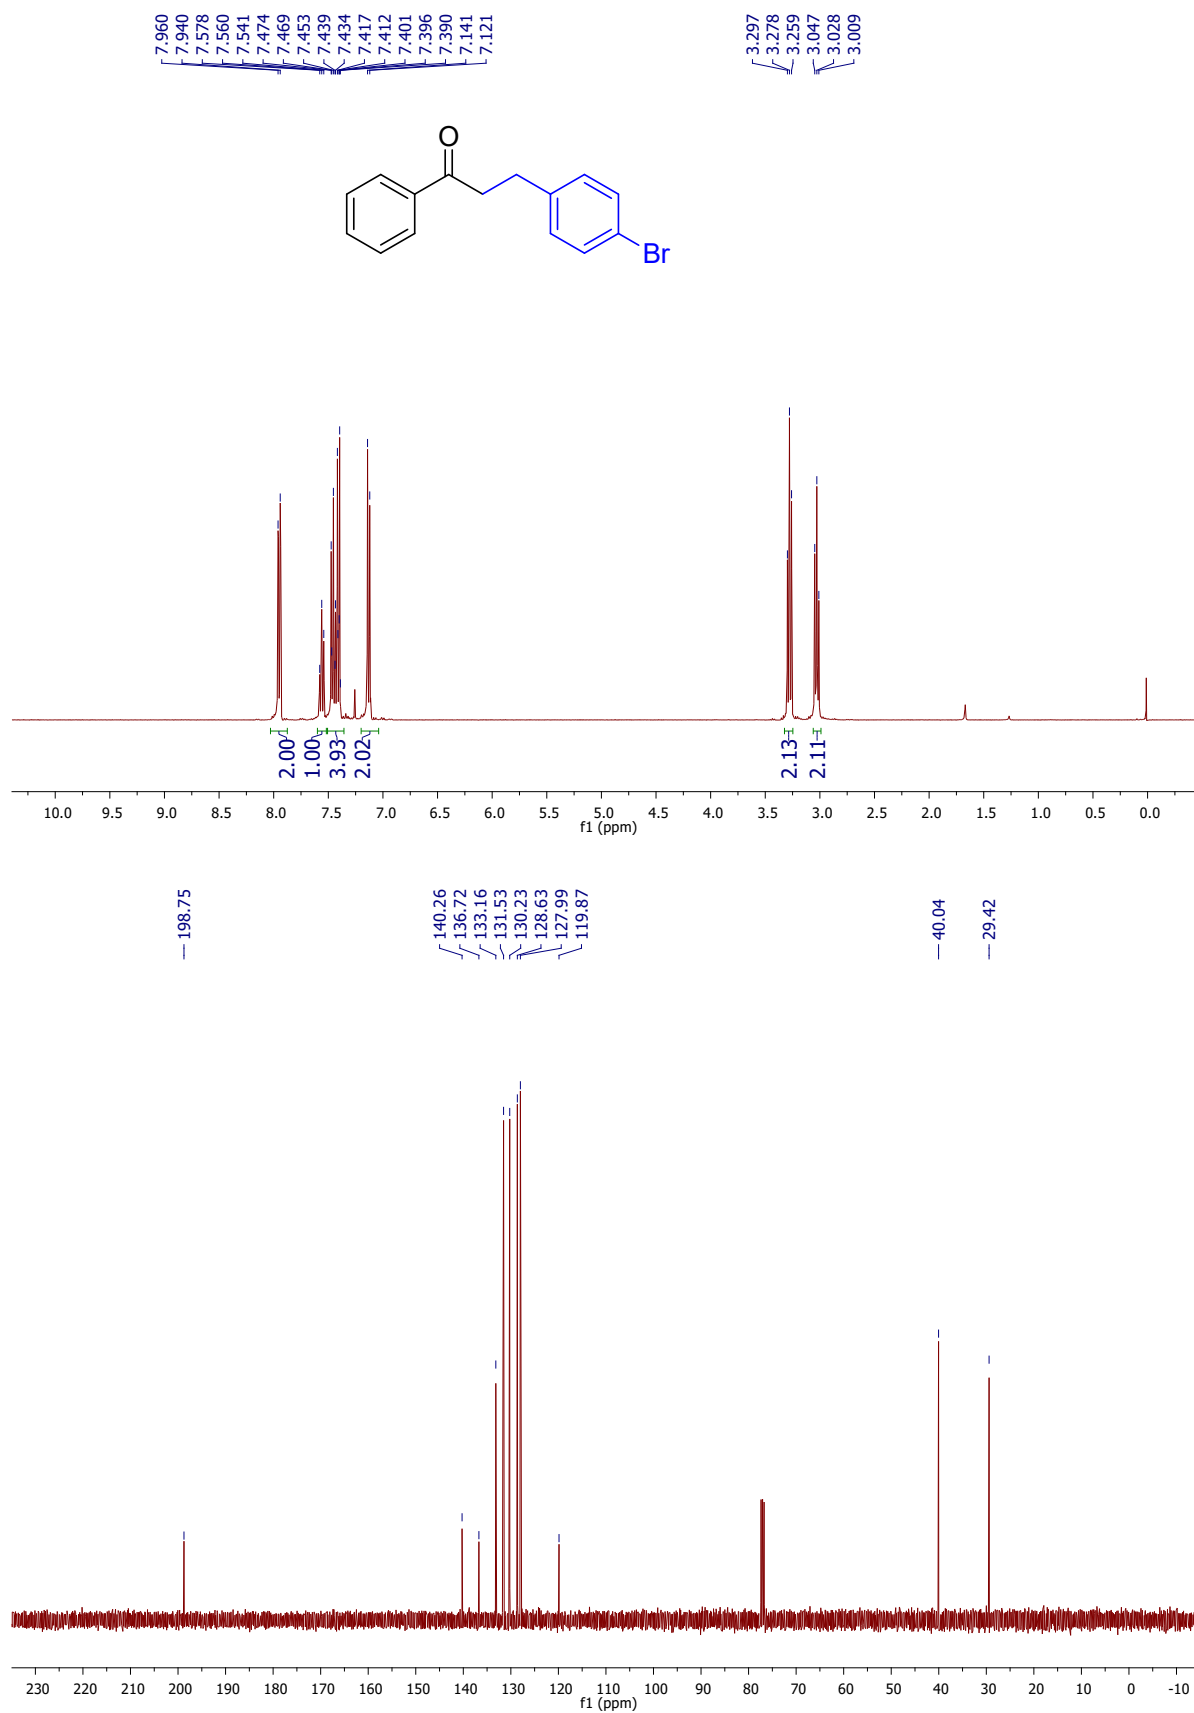

**Figure S20.** <sup>1</sup>H (400 MHz, CDCl<sub>3</sub>) and <sup>13</sup>C (100.6 MHz, CDCl<sub>3</sub>) NMR spectra of **4I**

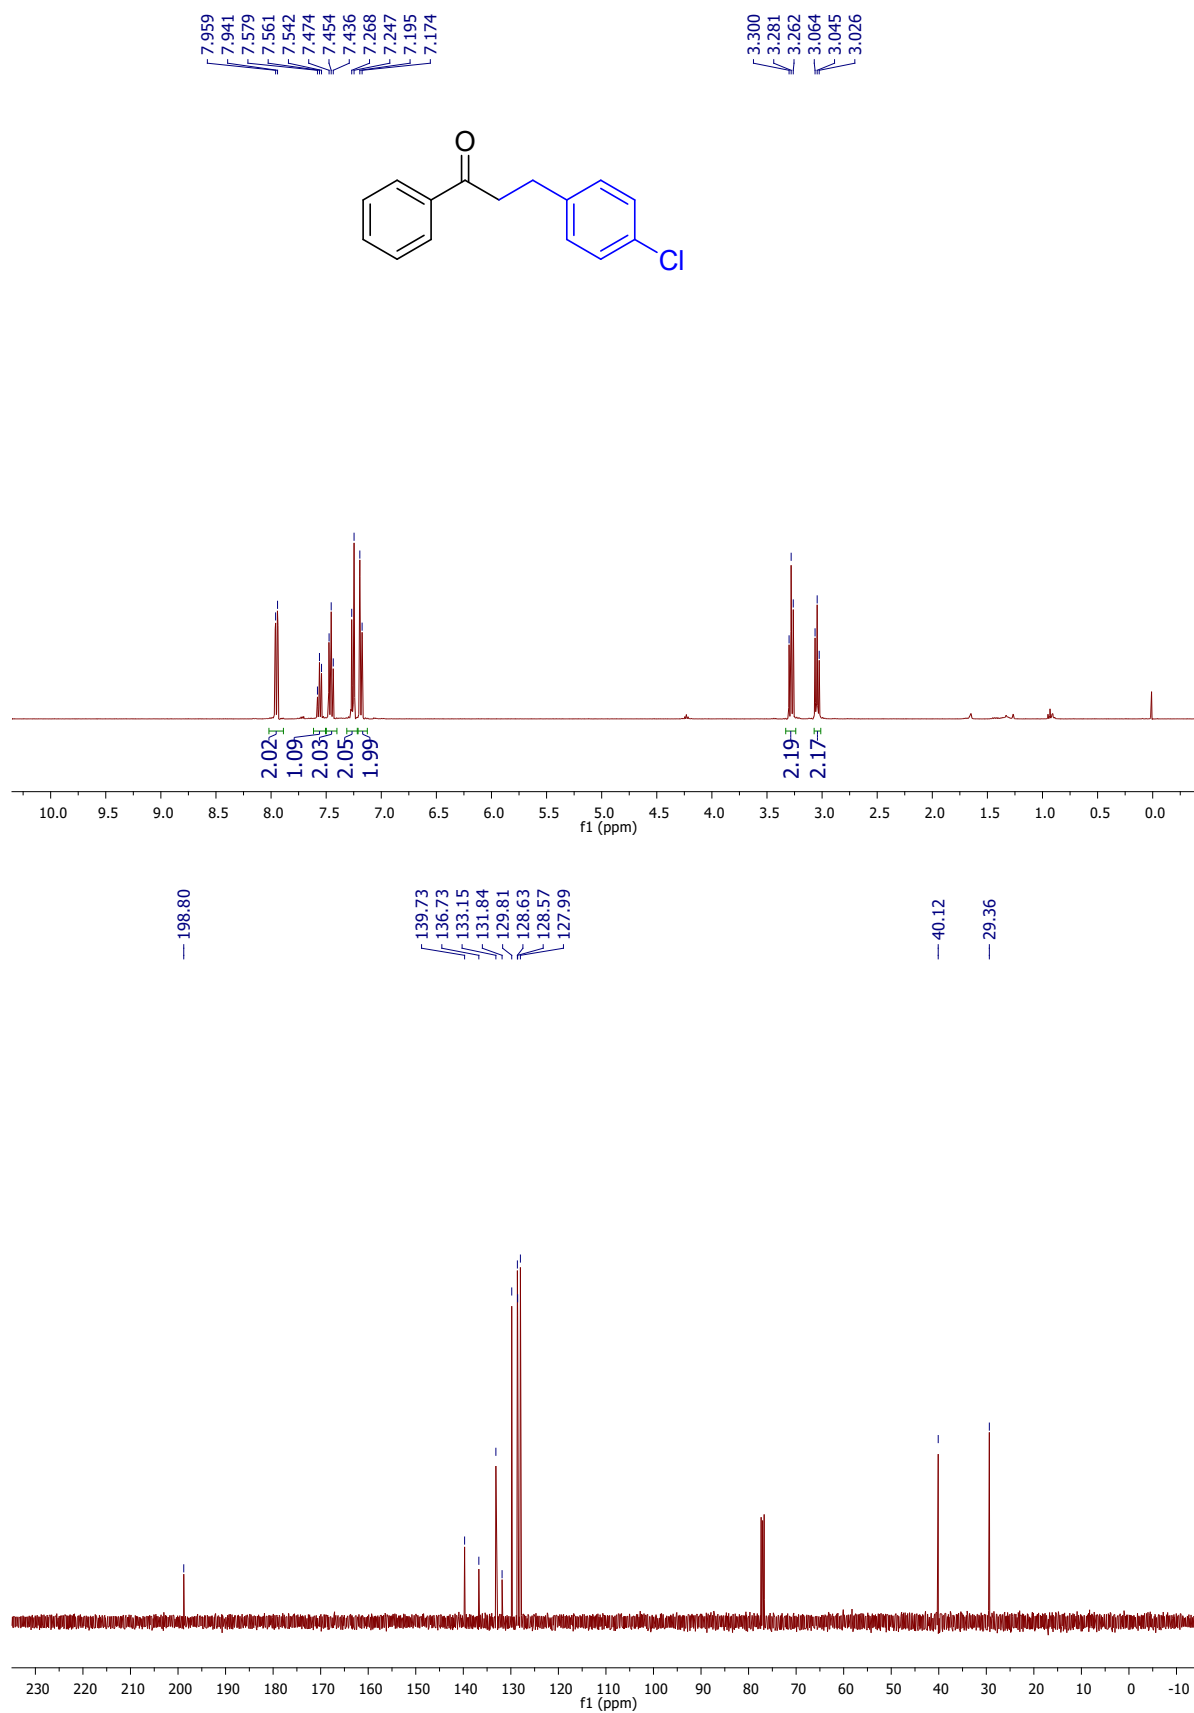

**Figure S21.** <sup>1</sup>H (400 MHz, CDCl<sub>3</sub>) and <sup>13</sup>C (100.6 MHz, CDCl<sub>3</sub>) NMR spectra of **4m**

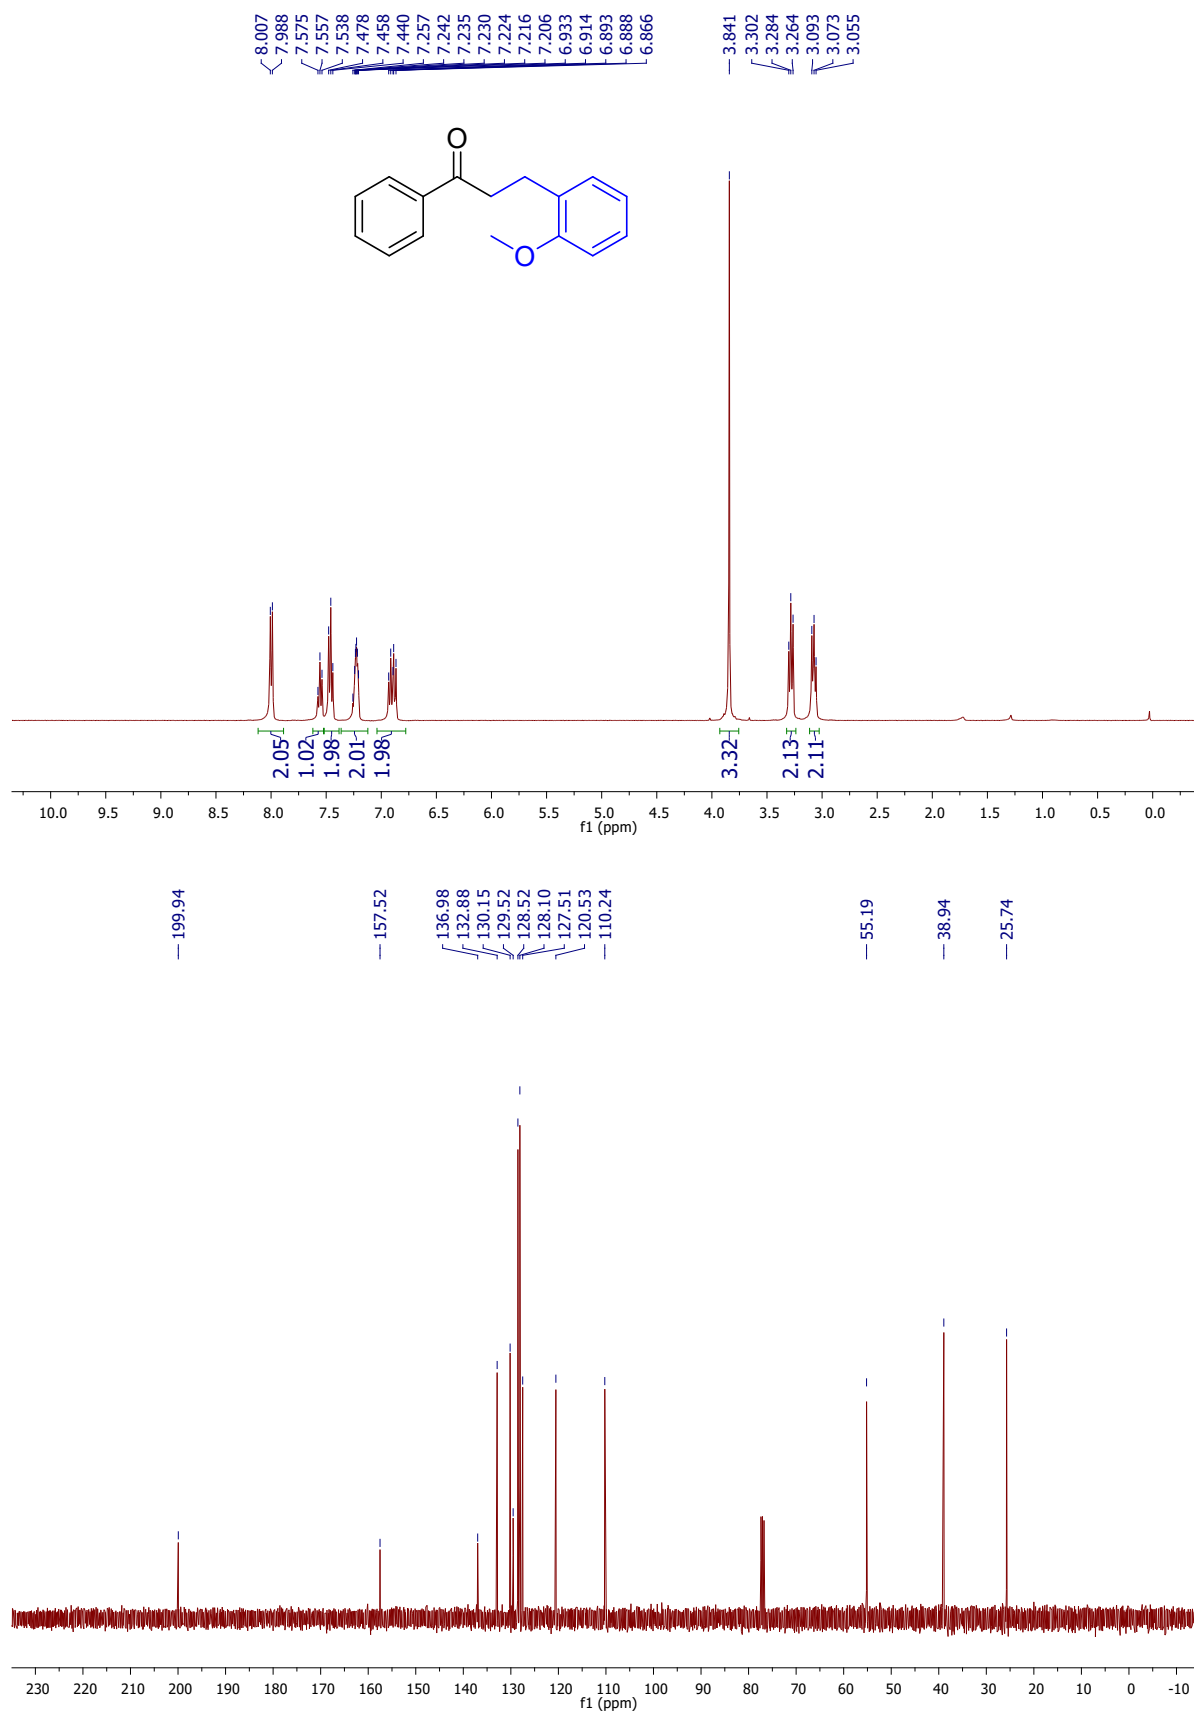

**Figure S22.** <sup>1</sup>H (400 MHz, CDCl<sub>3</sub>) and <sup>13</sup>C (100.6 MHz, CDCl<sub>3</sub>) NMR spectra of **4n**

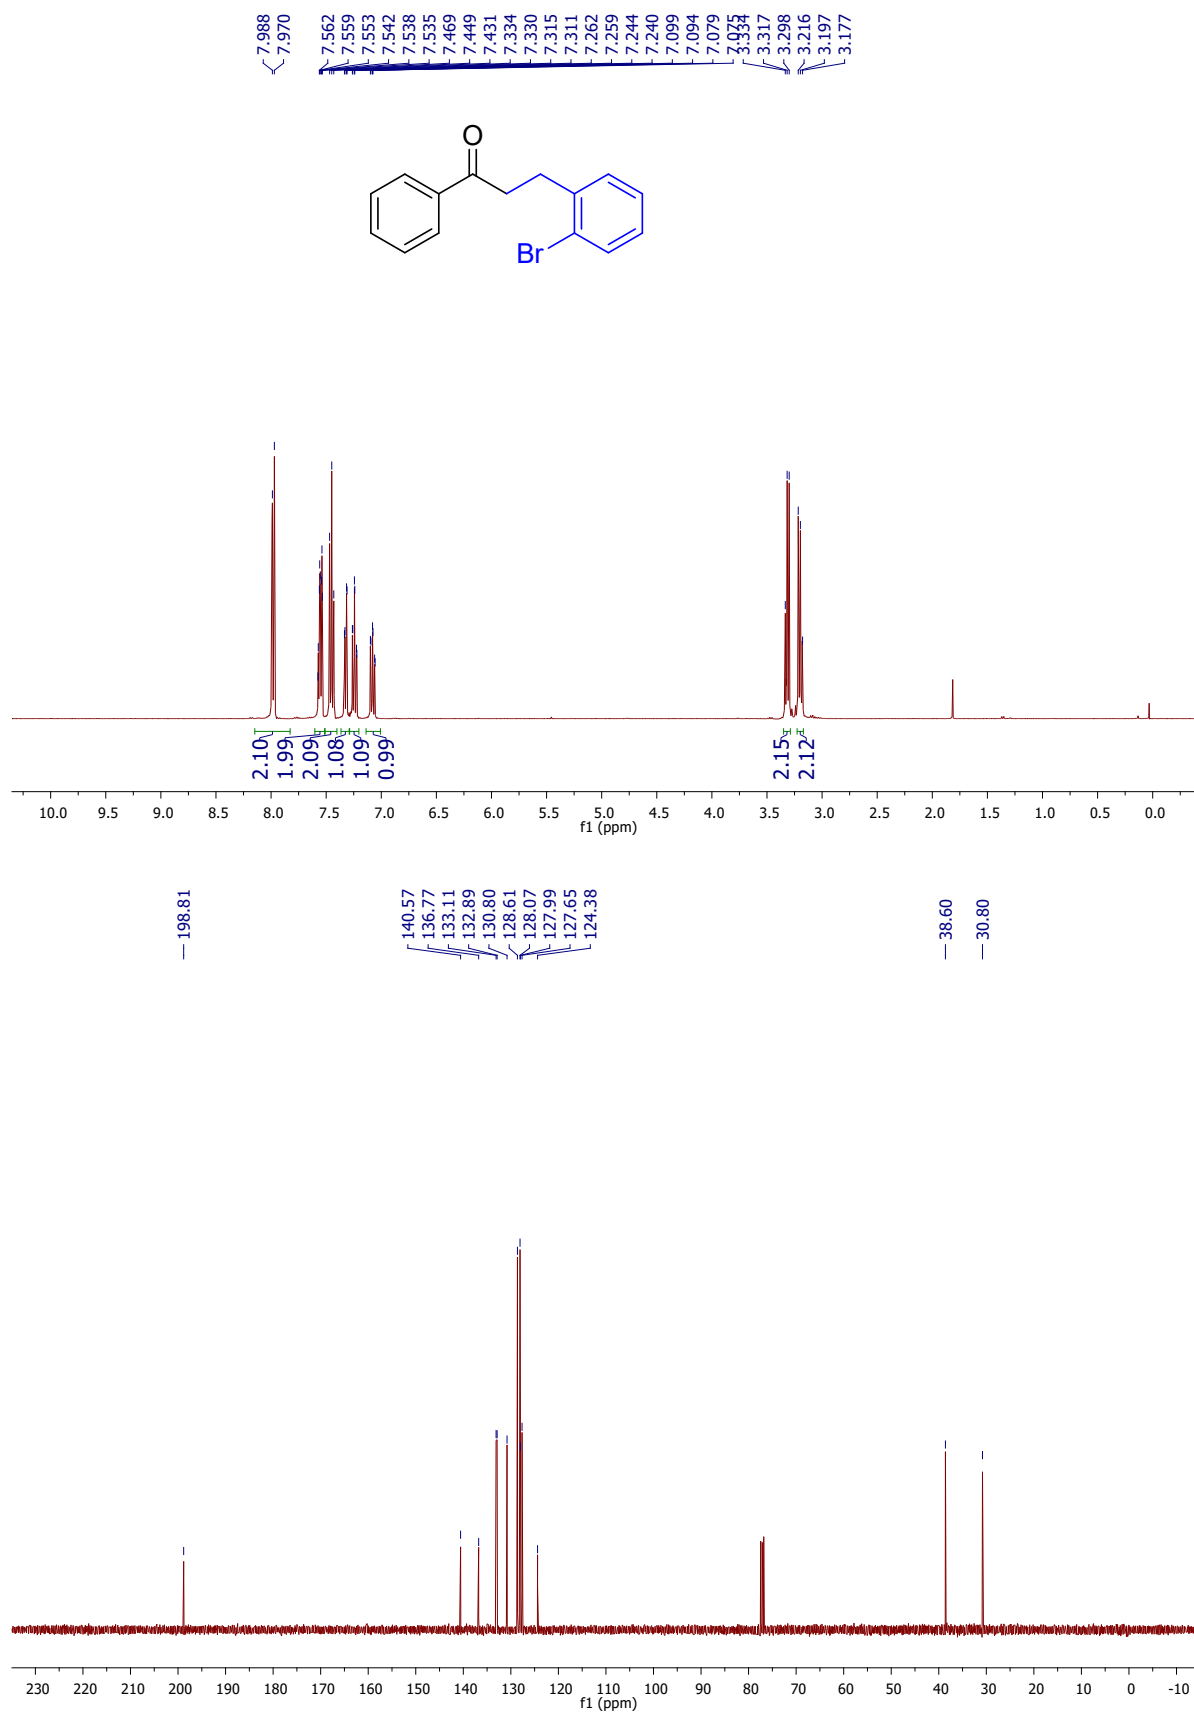

**Figure S23.** <sup>1</sup>H (400 MHz, CDCl<sub>3</sub>) and <sup>13</sup>C (100.6 MHz, CDCl<sub>3</sub>) NMR spectra of **4o**

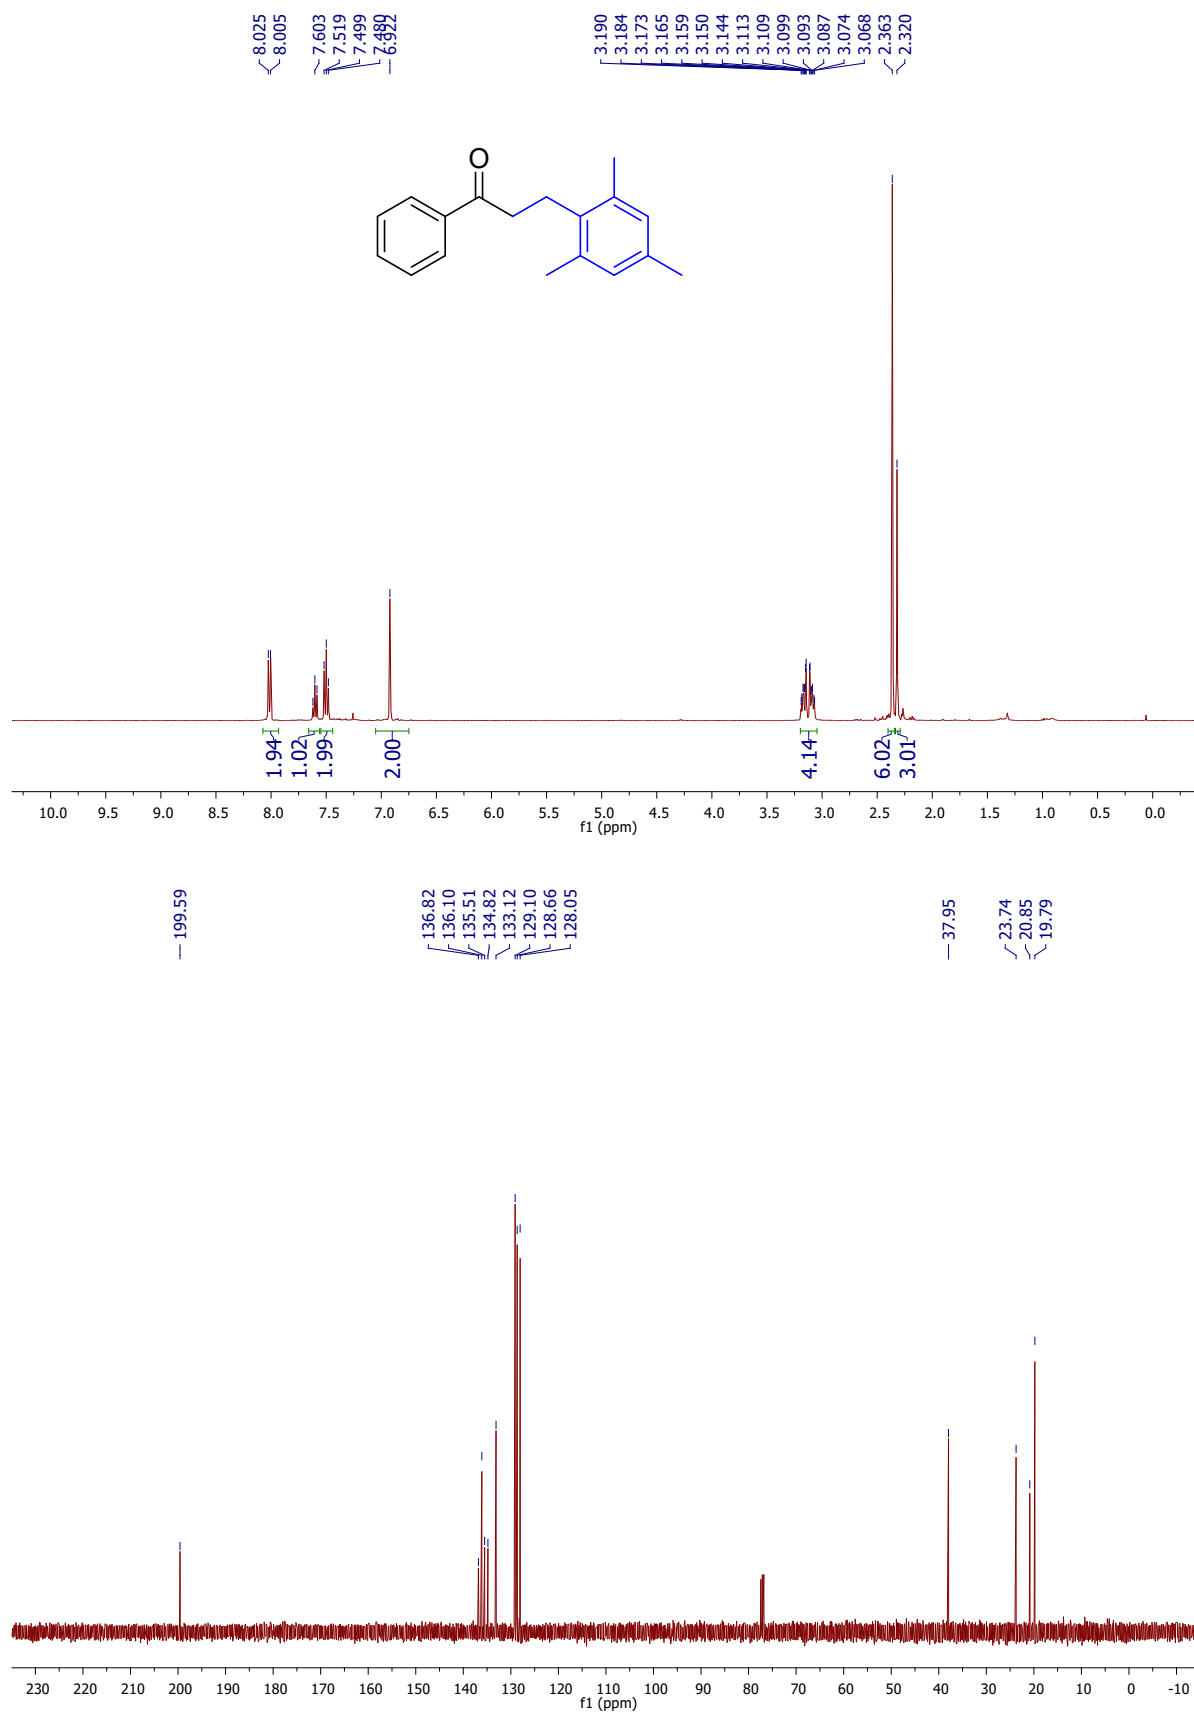

**Figure S24.** <sup>1</sup>H (400 MHz, CDCl<sub>3</sub>) and <sup>13</sup>C (100.6 MHz, CDCl<sub>3</sub>) NMR spectra of **4p**



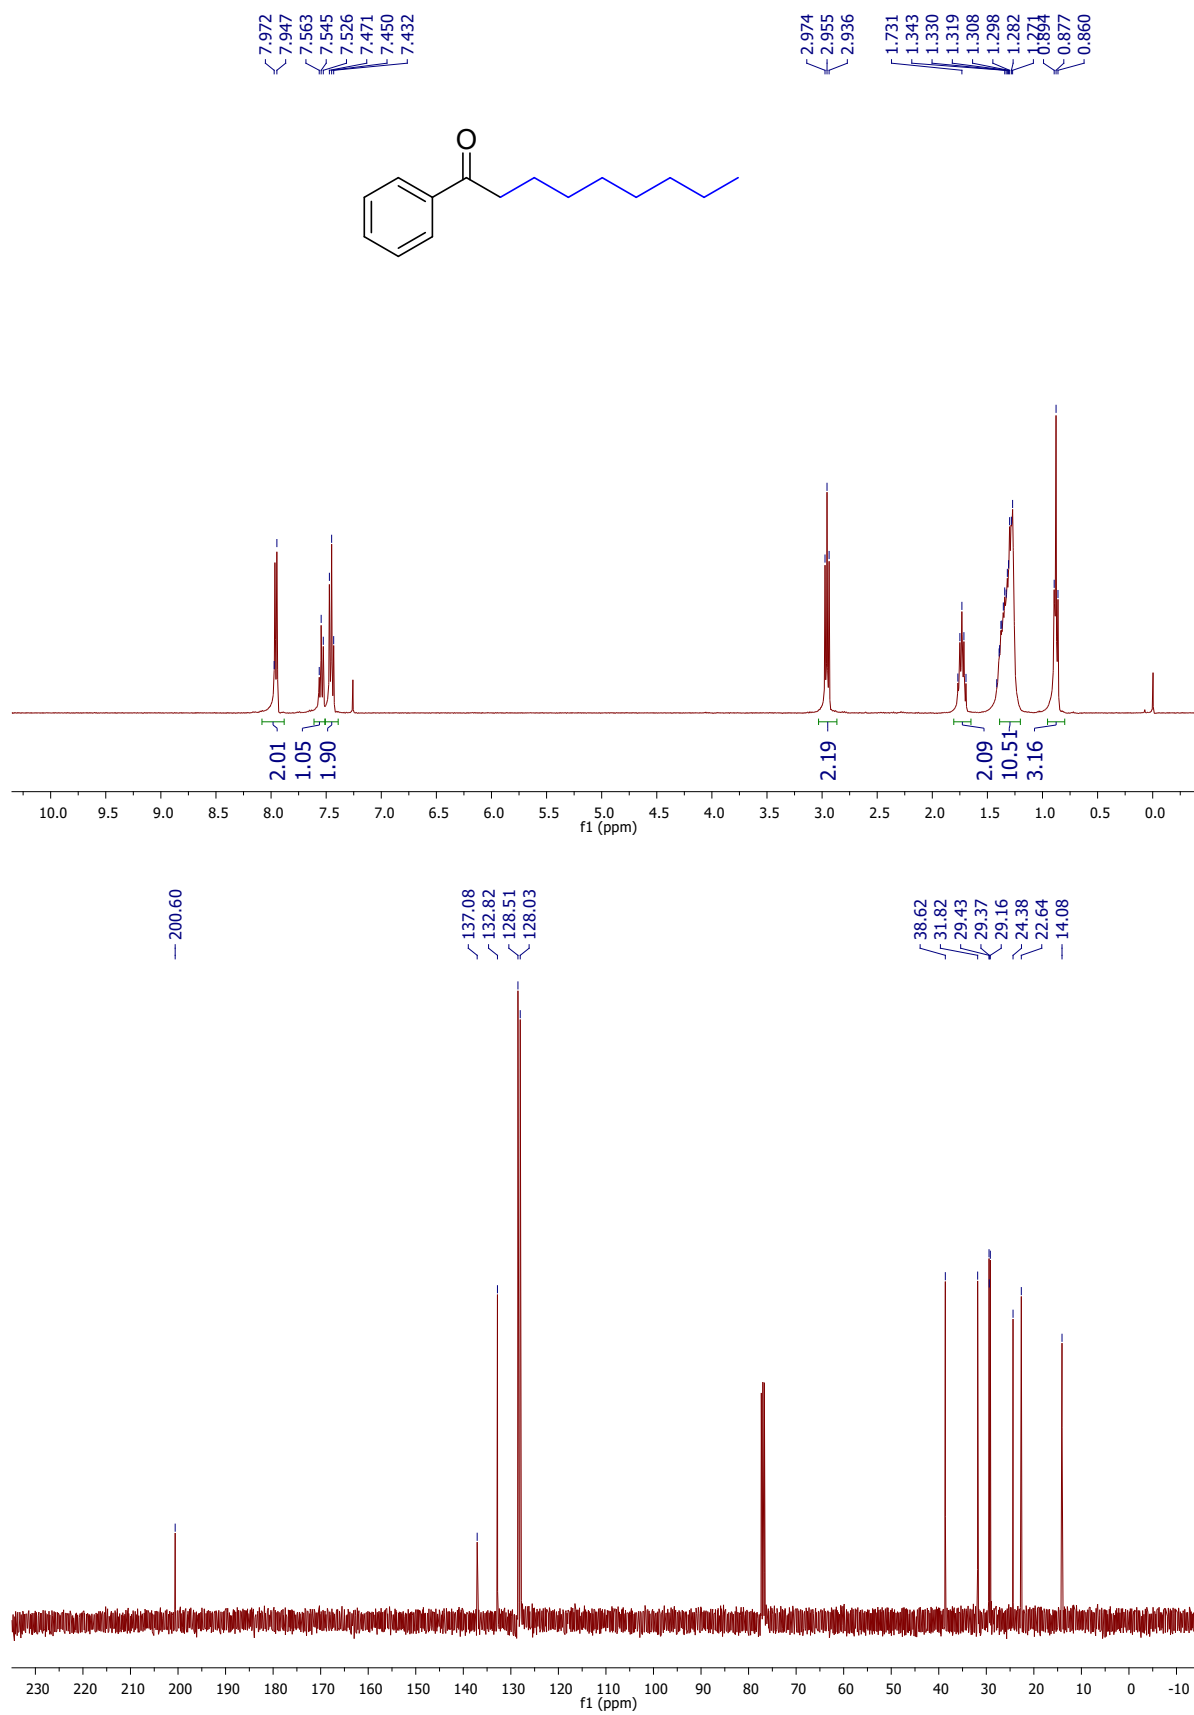

**Figure S25.** <sup>1</sup>H (400 MHz, CDCl<sub>3</sub>) and <sup>13</sup>C (100.6 MHz, CDCl<sub>3</sub>) NMR spectra of **4q**

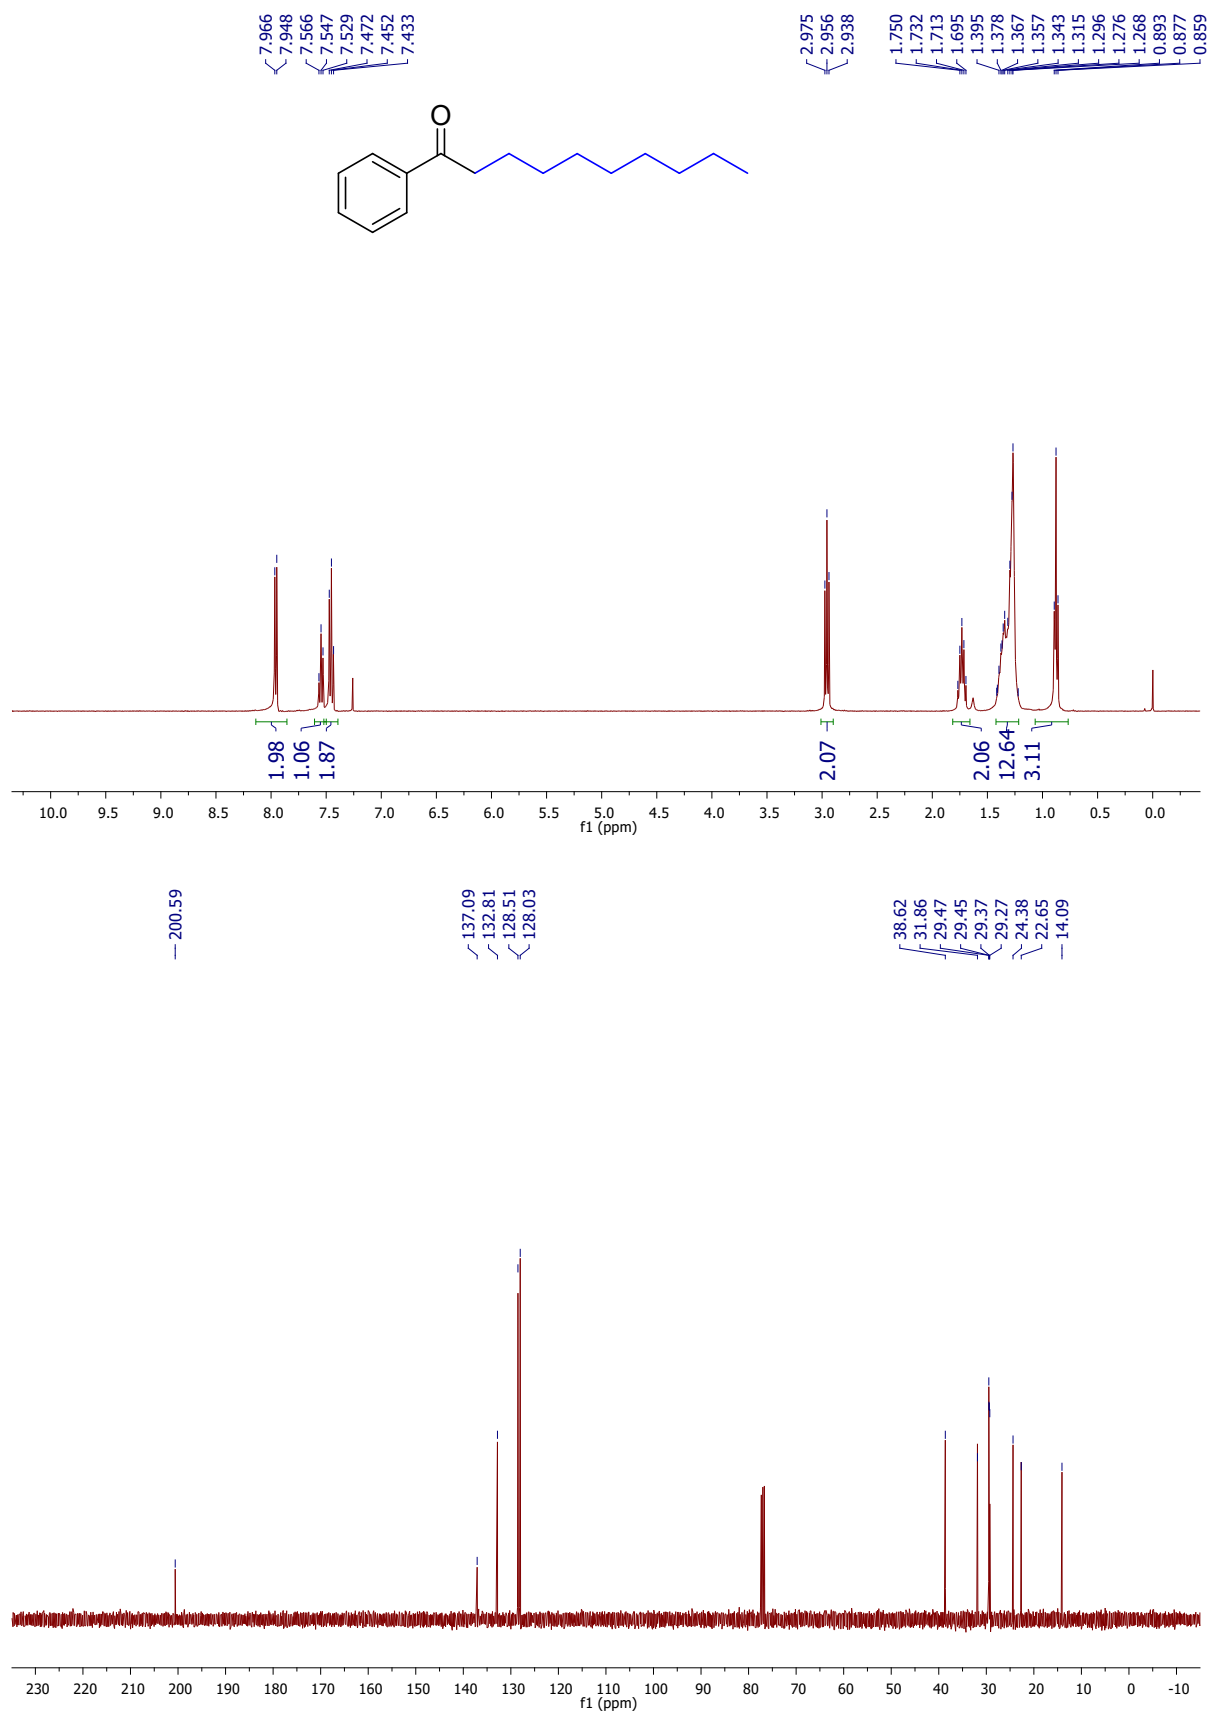

**Figure S26.** <sup>1</sup>H (400 MHz, CDCl<sub>3</sub>) and <sup>13</sup>C (100.6 MHz, CDCl<sub>3</sub>) NMR spectra of **4r**

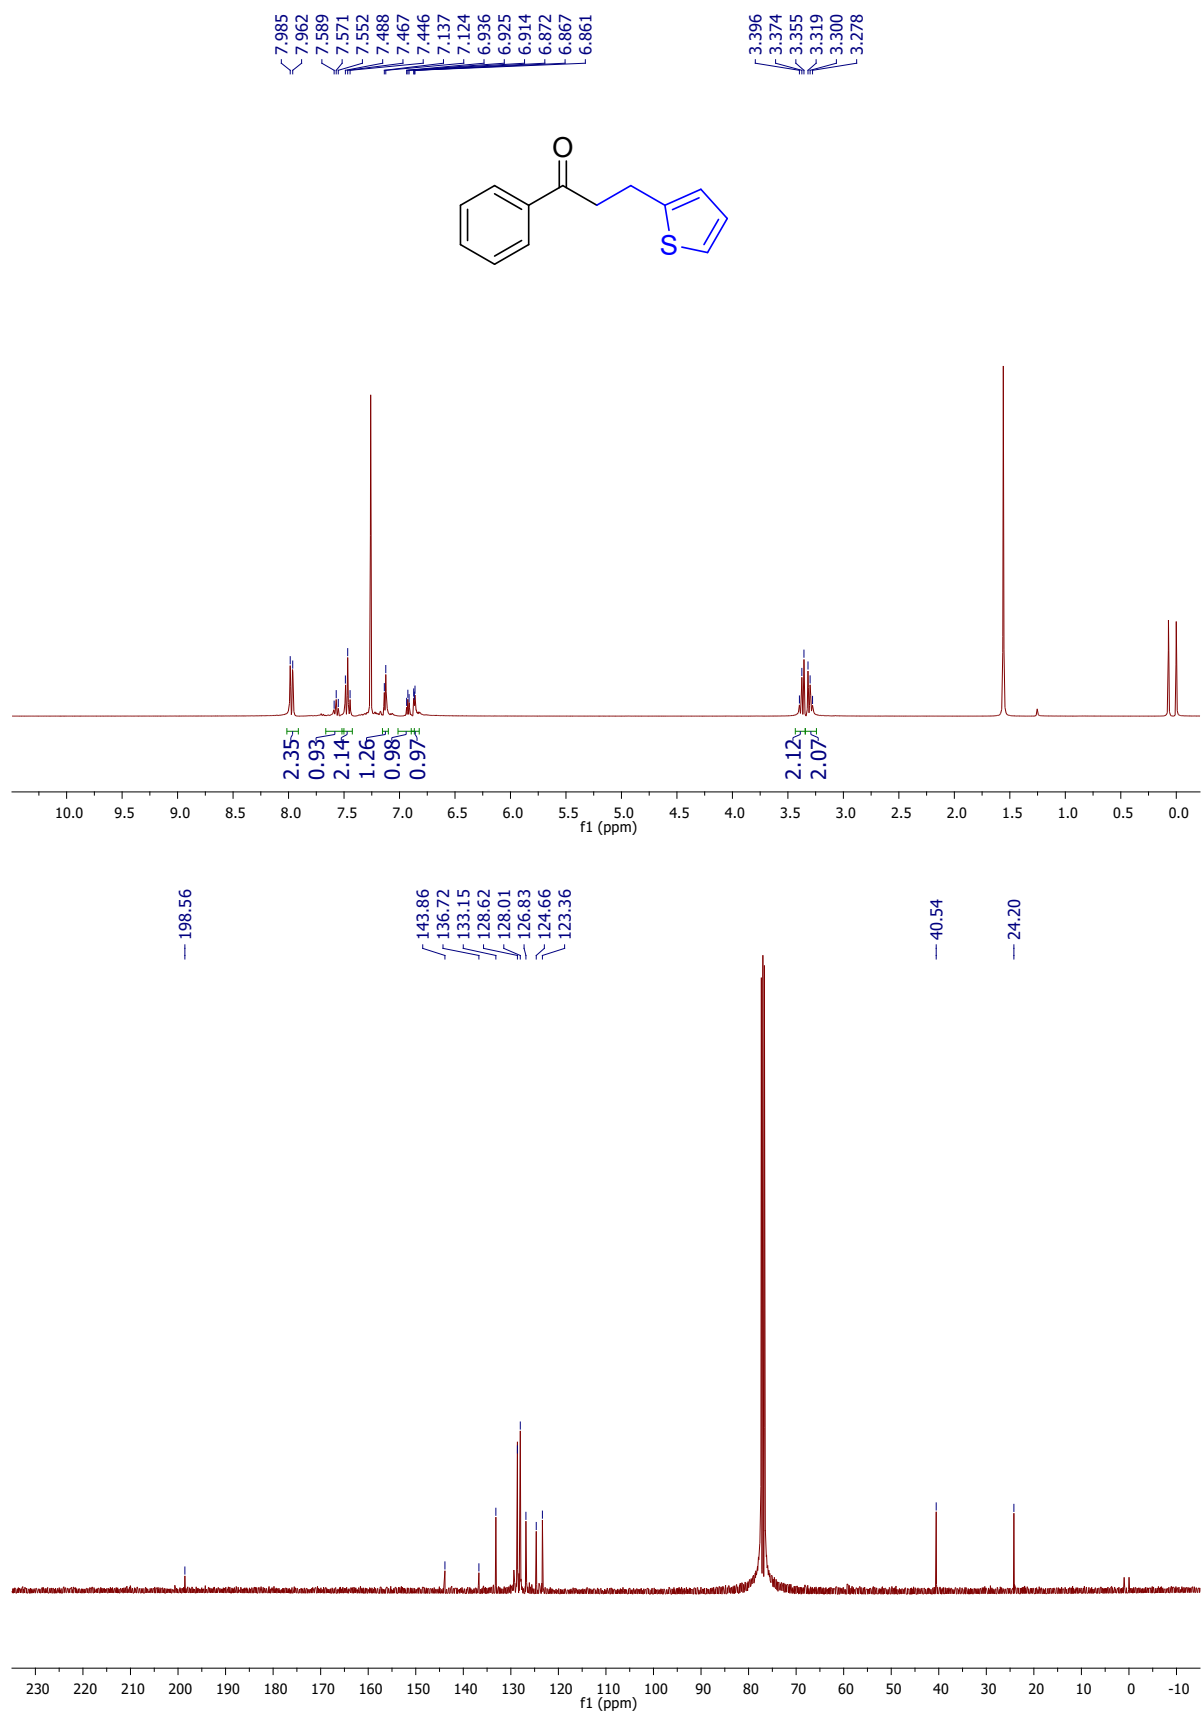

**Figure S27.** <sup>1</sup>H (400 MHz, CDCl<sub>3</sub>) and <sup>13</sup>C (100.6 MHz, CDCl<sub>3</sub>) NMR spectra of **4s**

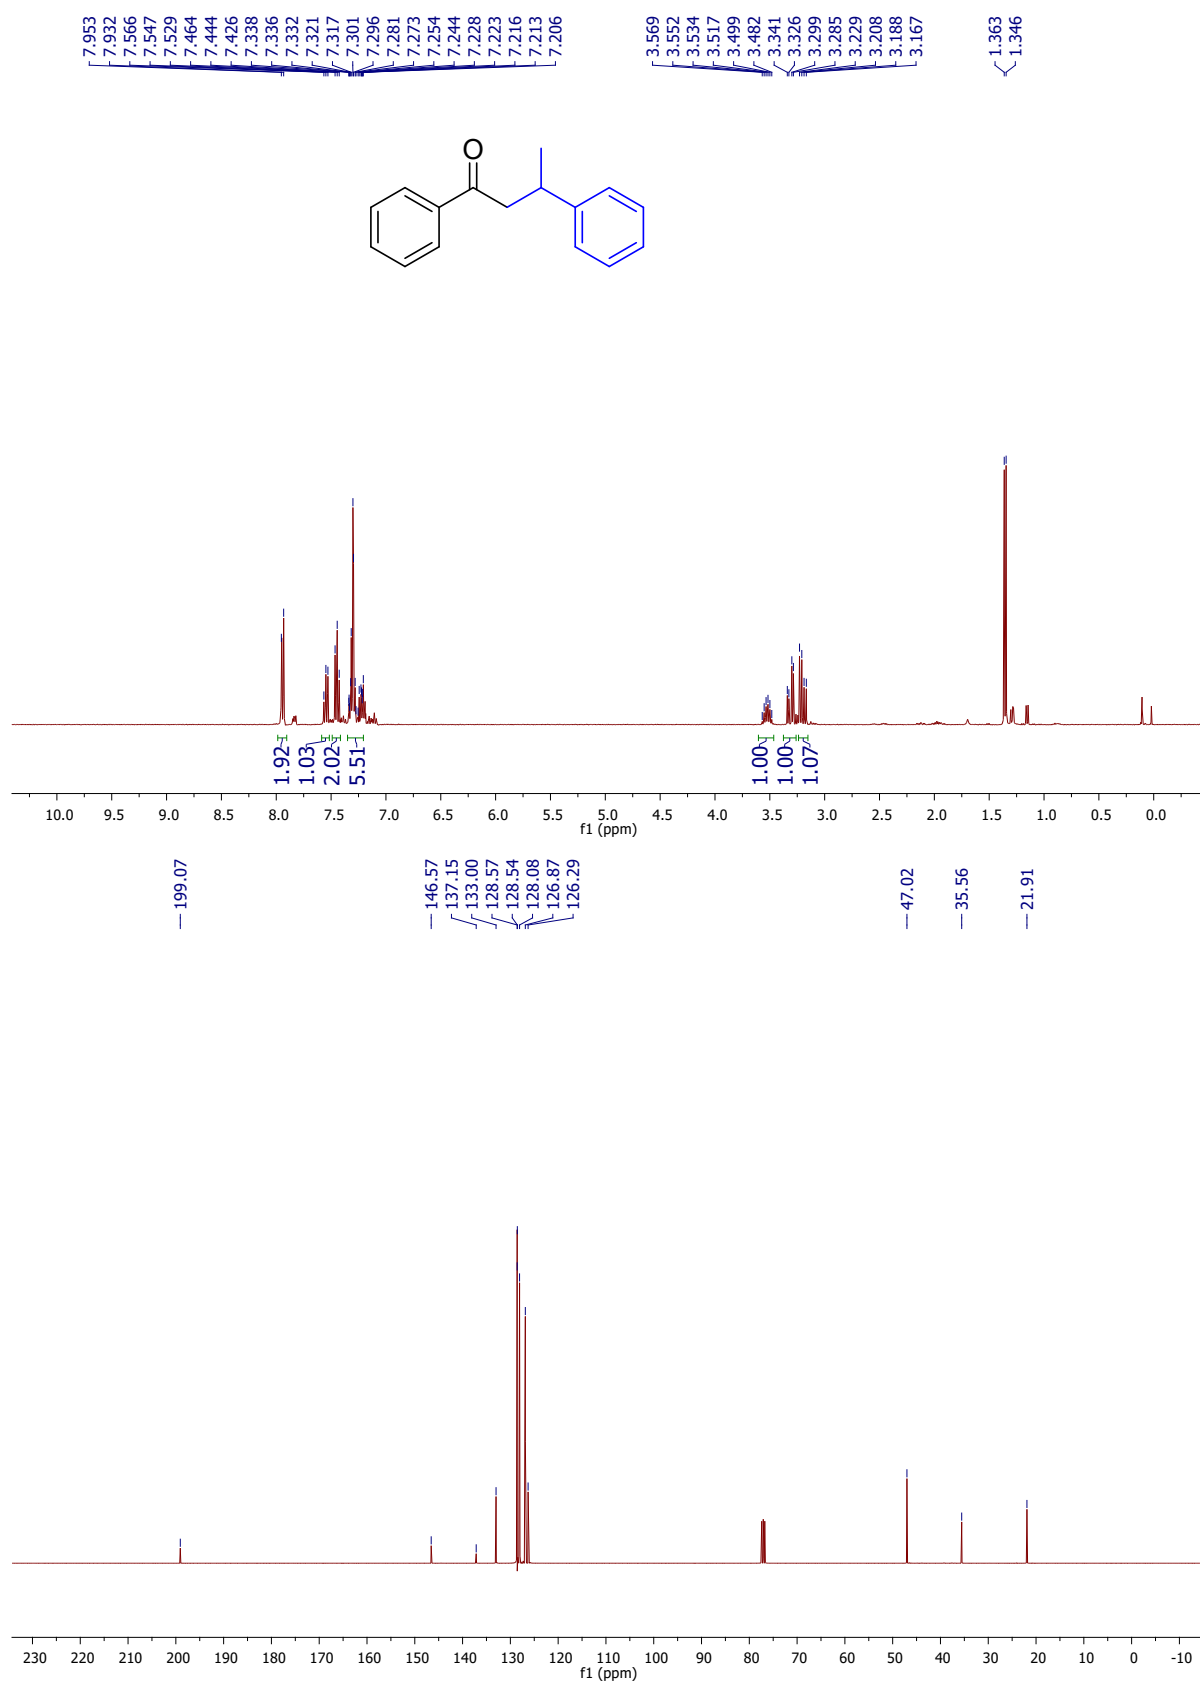

**Figure S28.** <sup>1</sup>H (400 MHz, CDCl<sub>3</sub>) and <sup>13</sup>C (100.6 MHz, CDCl<sub>3</sub>) NMR spectra of **4t**

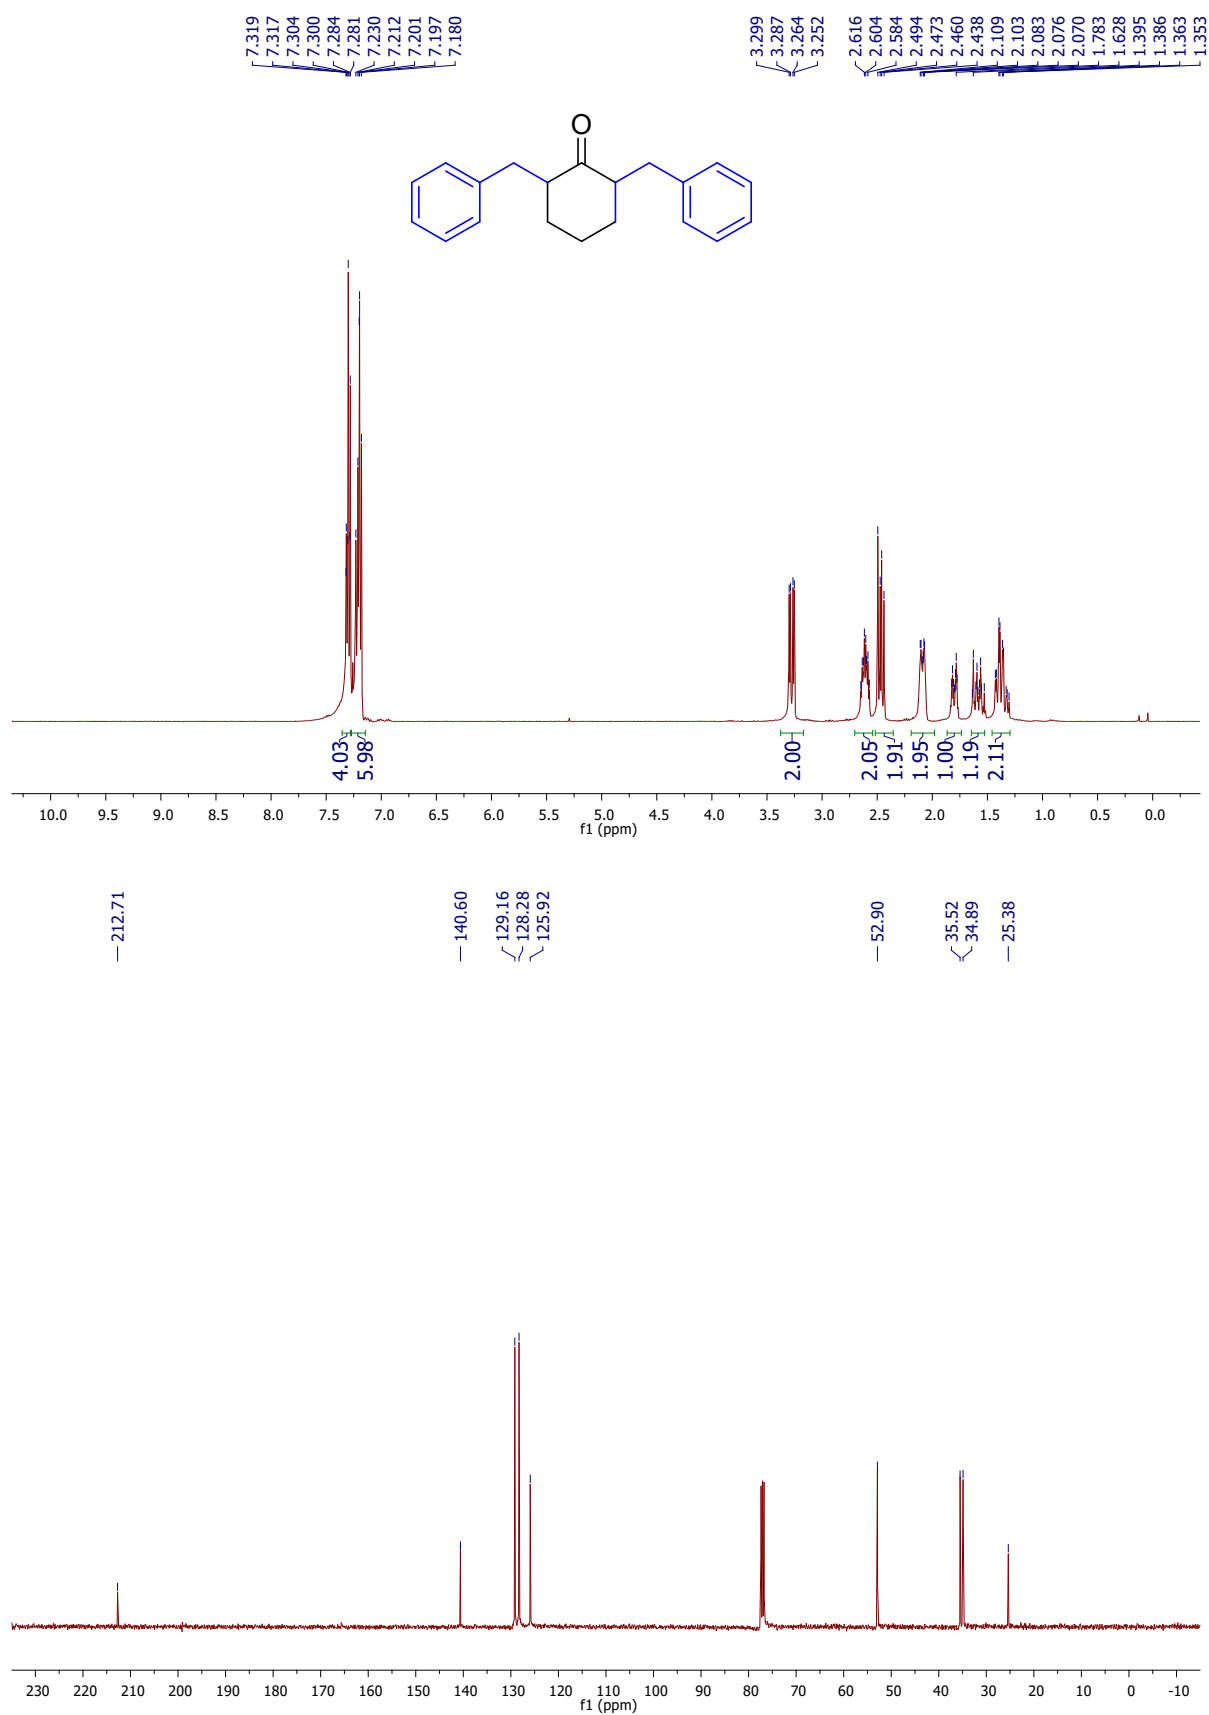

**Figure S29.** <sup>1</sup>H (400 MHz, CDCl<sub>3</sub>) and <sup>13</sup>C (100.6 MHz, CDCl<sub>3</sub>) NMR spectra of **6a**

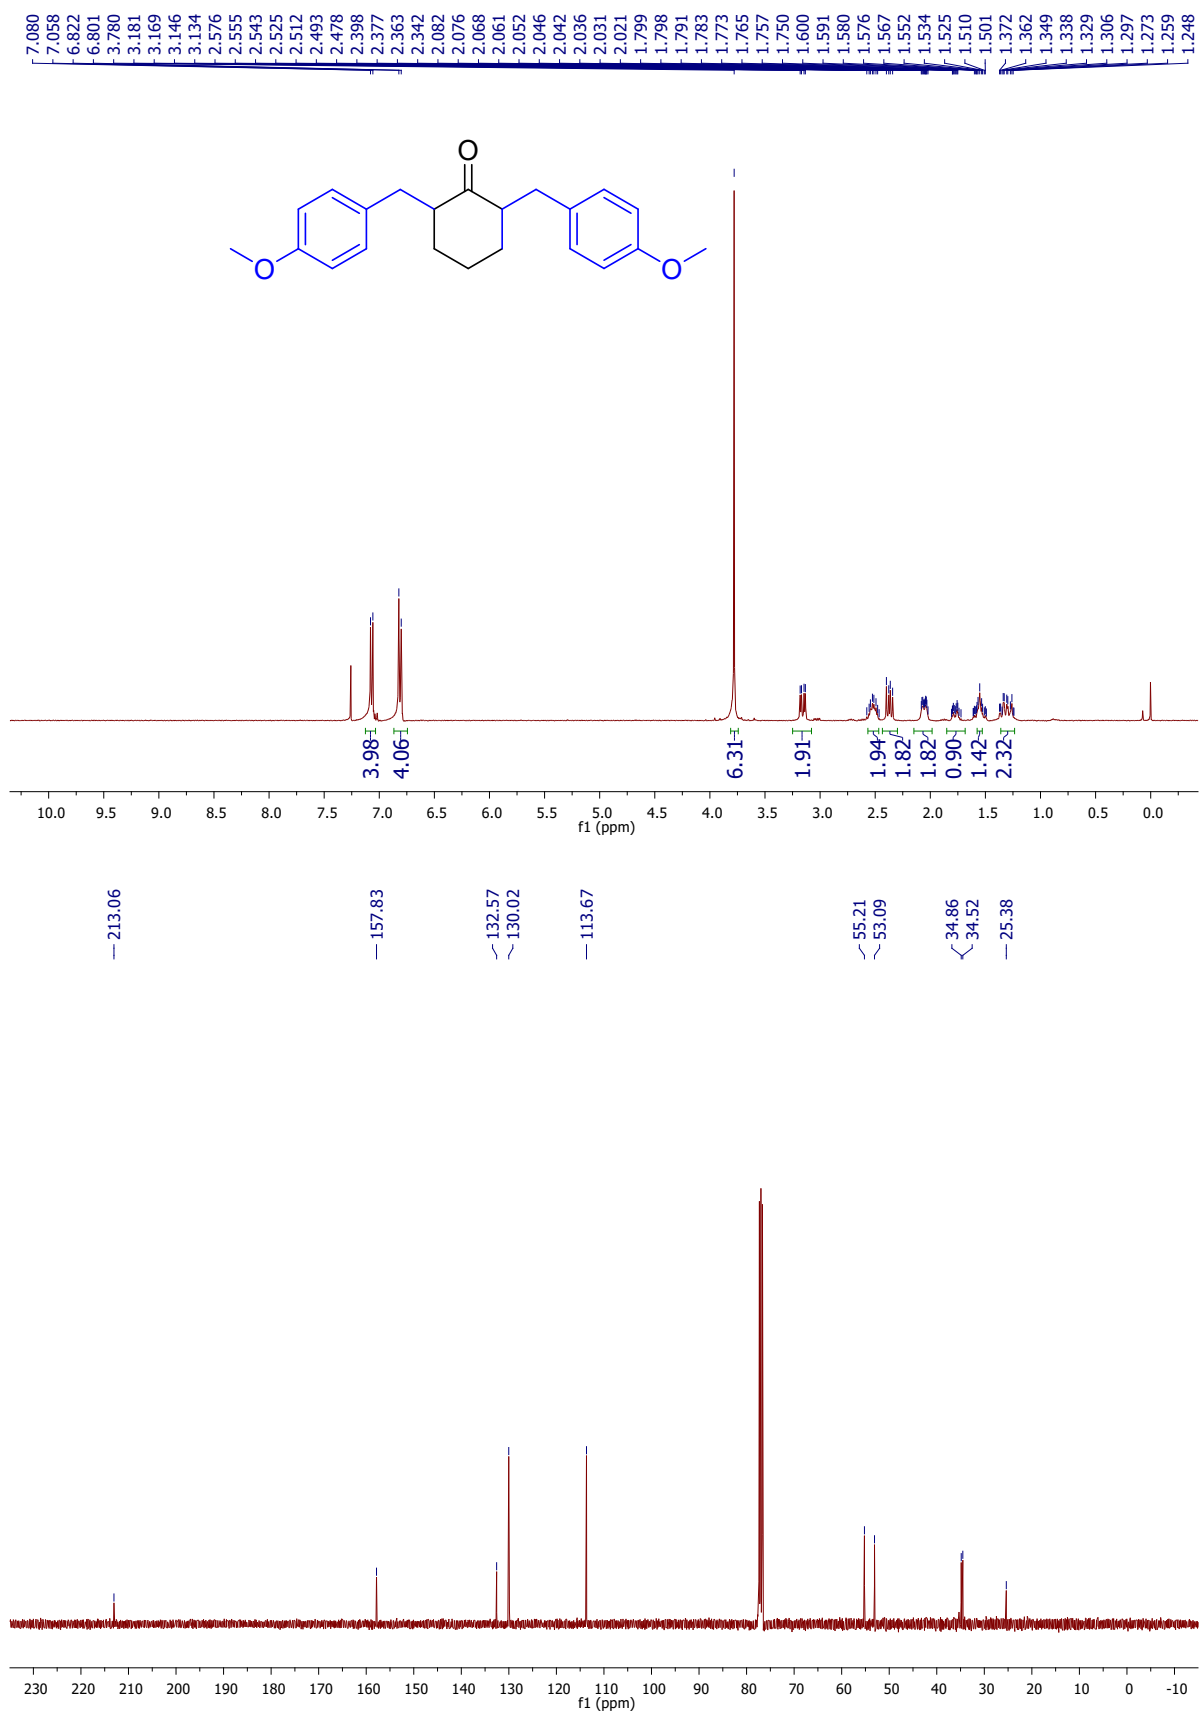

**Figure S30.** <sup>1</sup>H (400 MHz, CDCl<sub>3</sub>) and <sup>13</sup>C (100.6 MHz, CDCl<sub>3</sub>) NMR spectra of **6b**

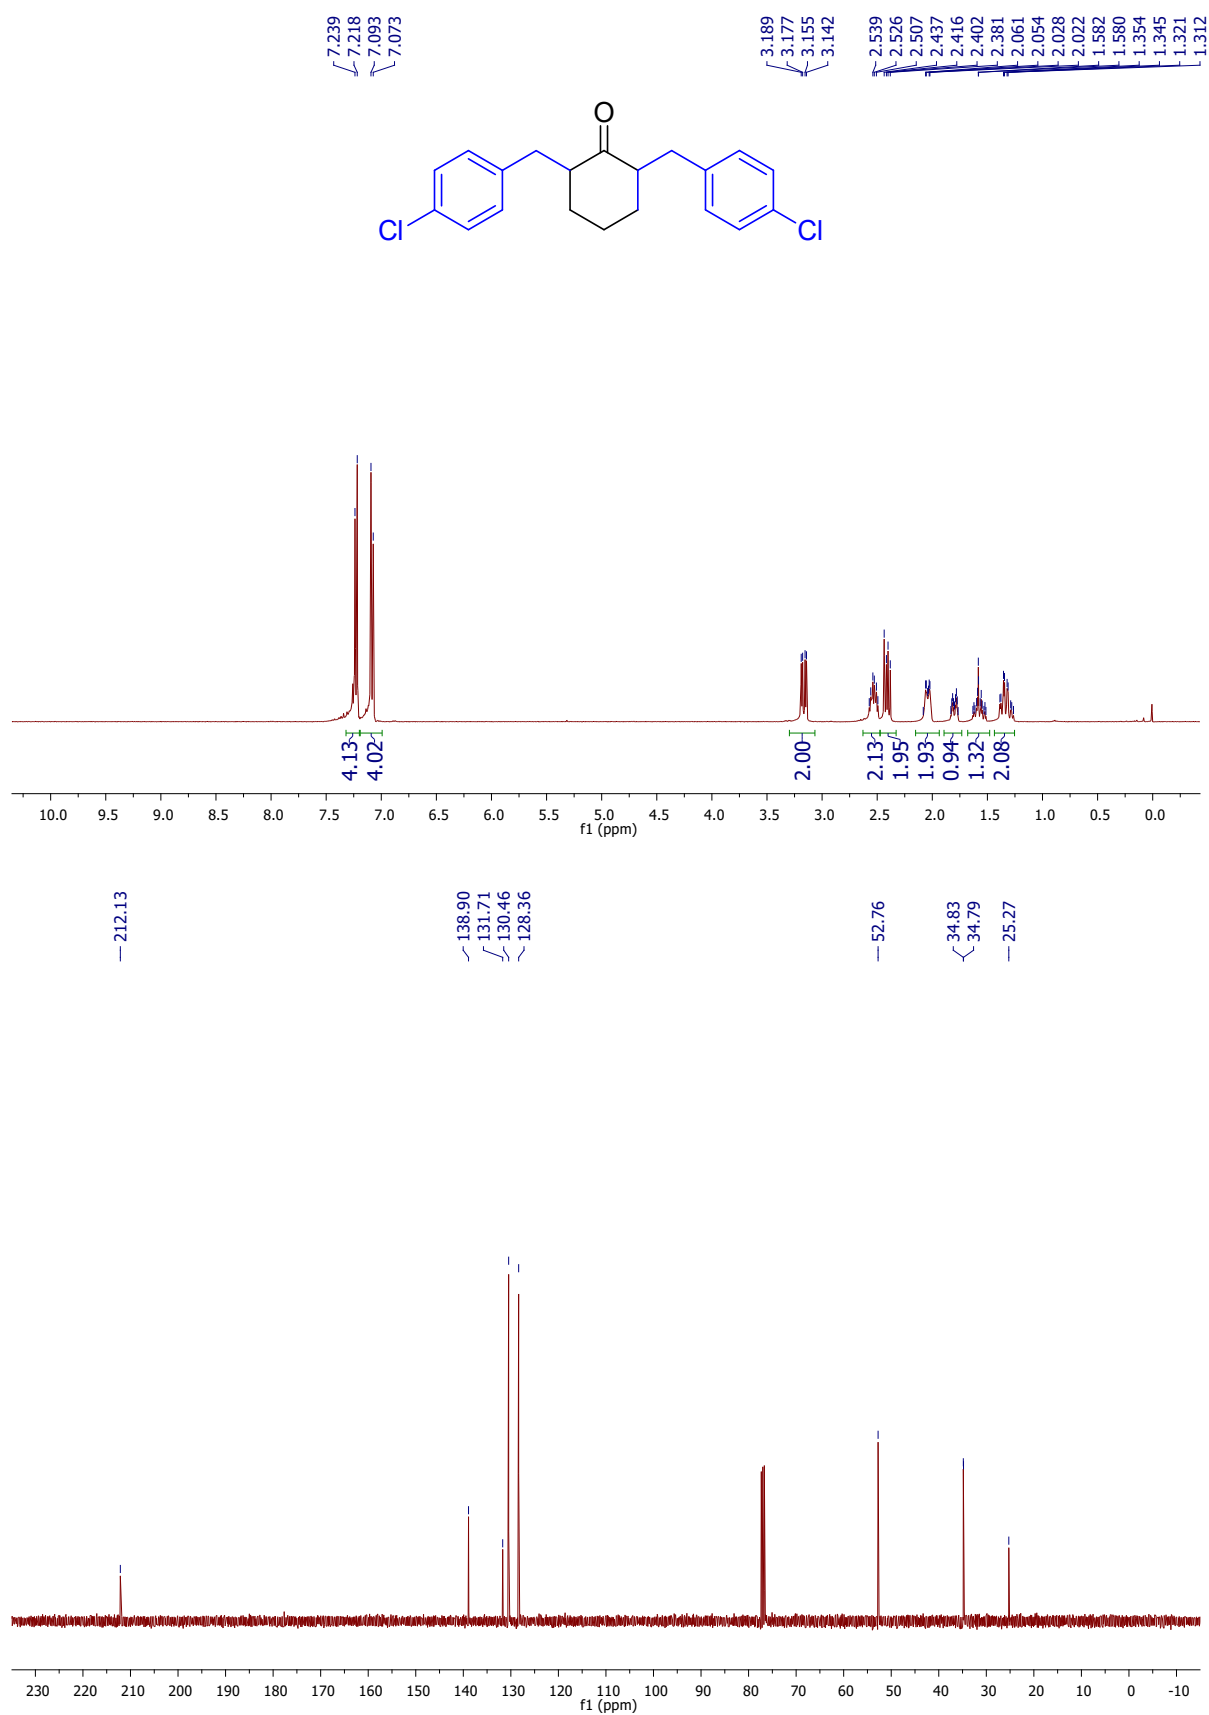

**Figure S31.** <sup>1</sup>H (400 MHz, CDCl<sub>3</sub>) and <sup>13</sup>C (100.6 MHz, CDCl<sub>3</sub>) NMR spectra of **6c**

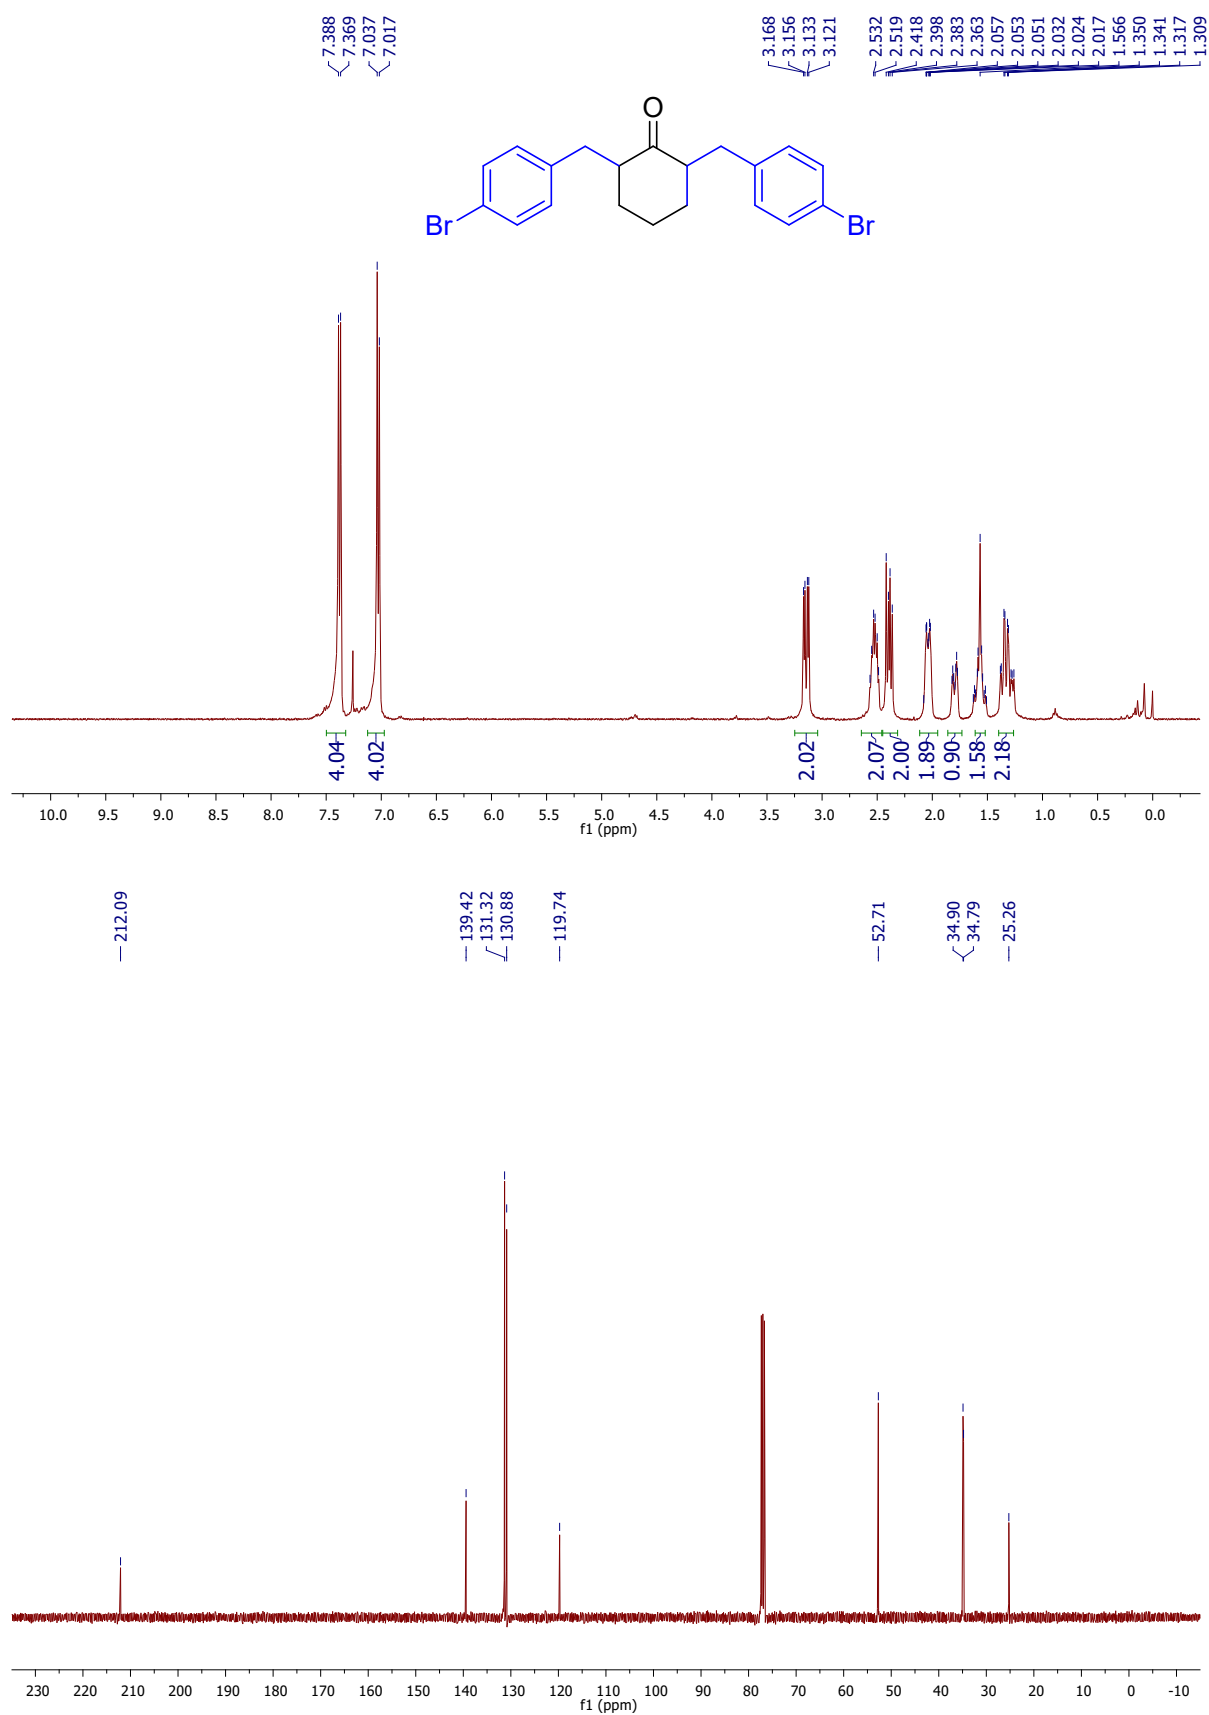

**Figure S32.** <sup>1</sup>H (400 MHz, CDCl<sub>3</sub>) and <sup>13</sup>C (100.6 MHz, CDCl<sub>3</sub>) NMR spectra of **6d**



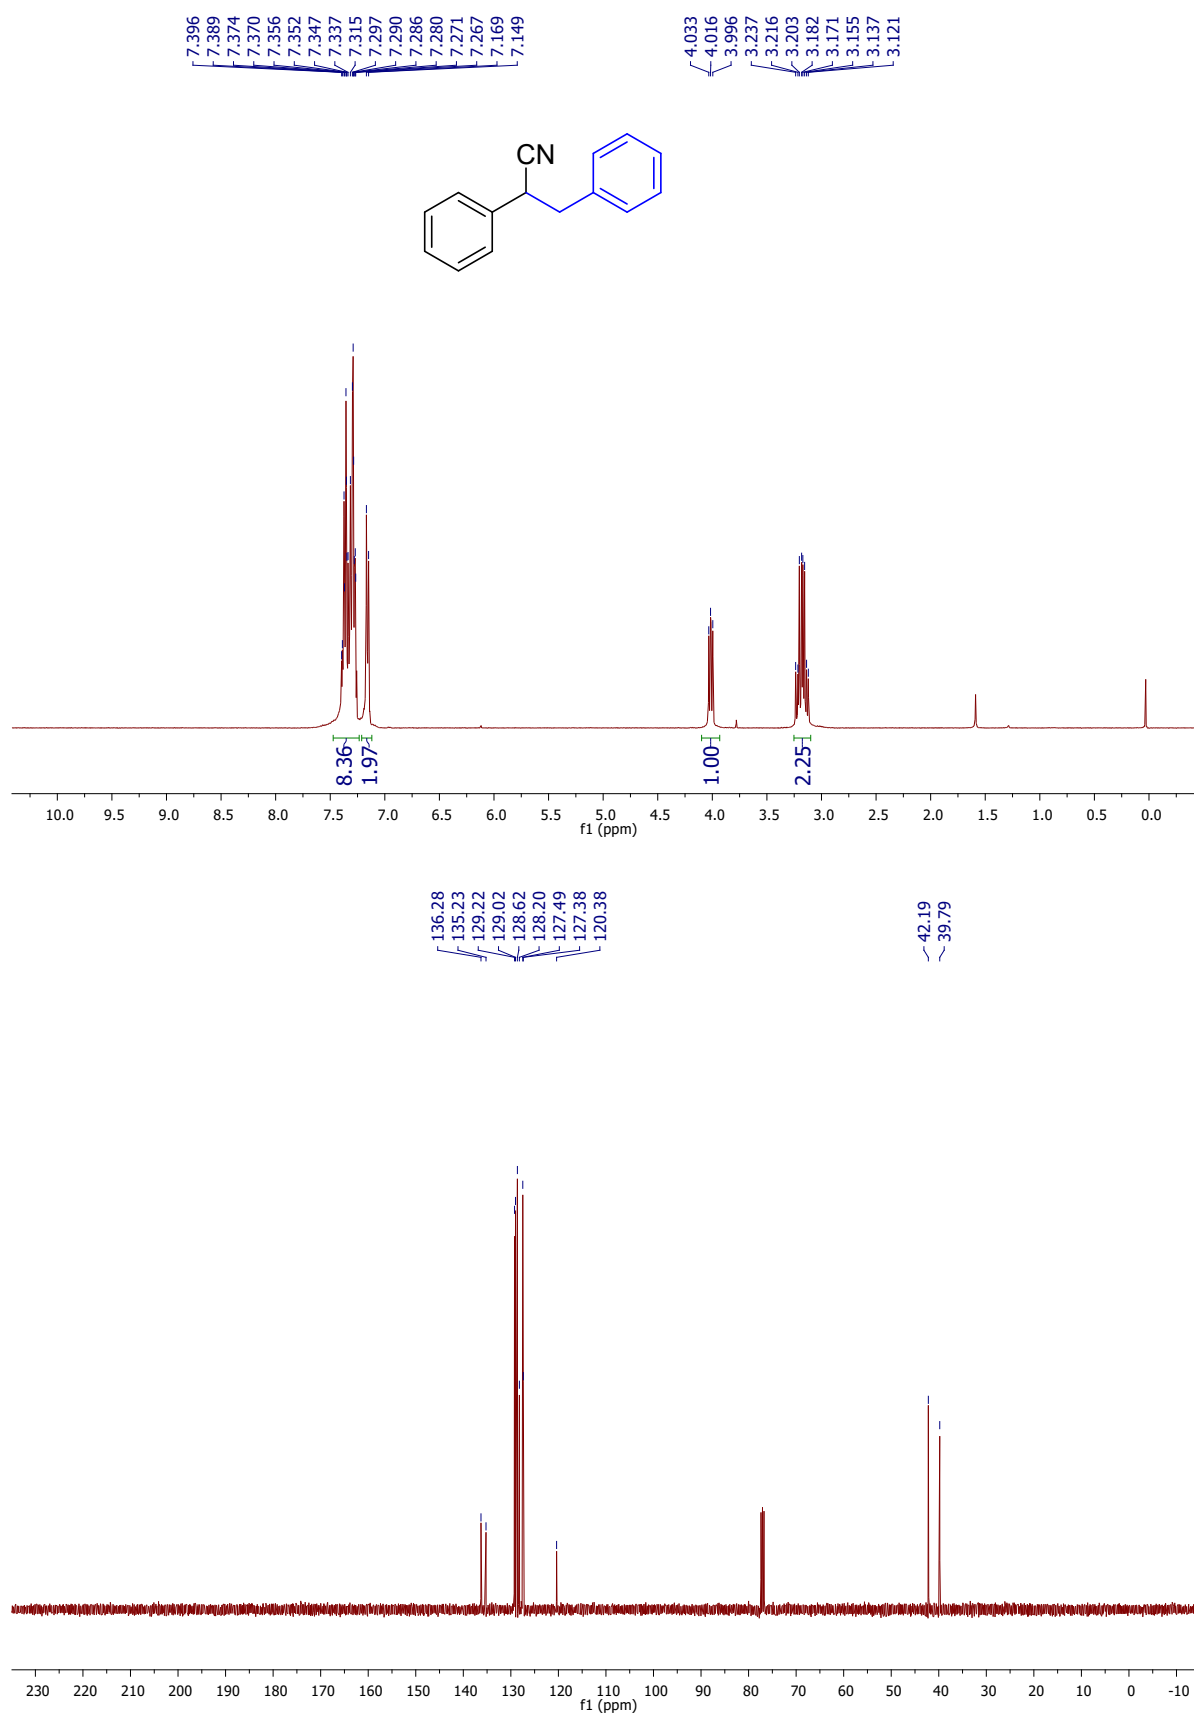

**Figure S33.** <sup>1</sup>H (400 MHz, CDCl<sub>3</sub>) and <sup>13</sup>C (100.6 MHz, CDCl<sub>3</sub>) NMR spectra of **8a**

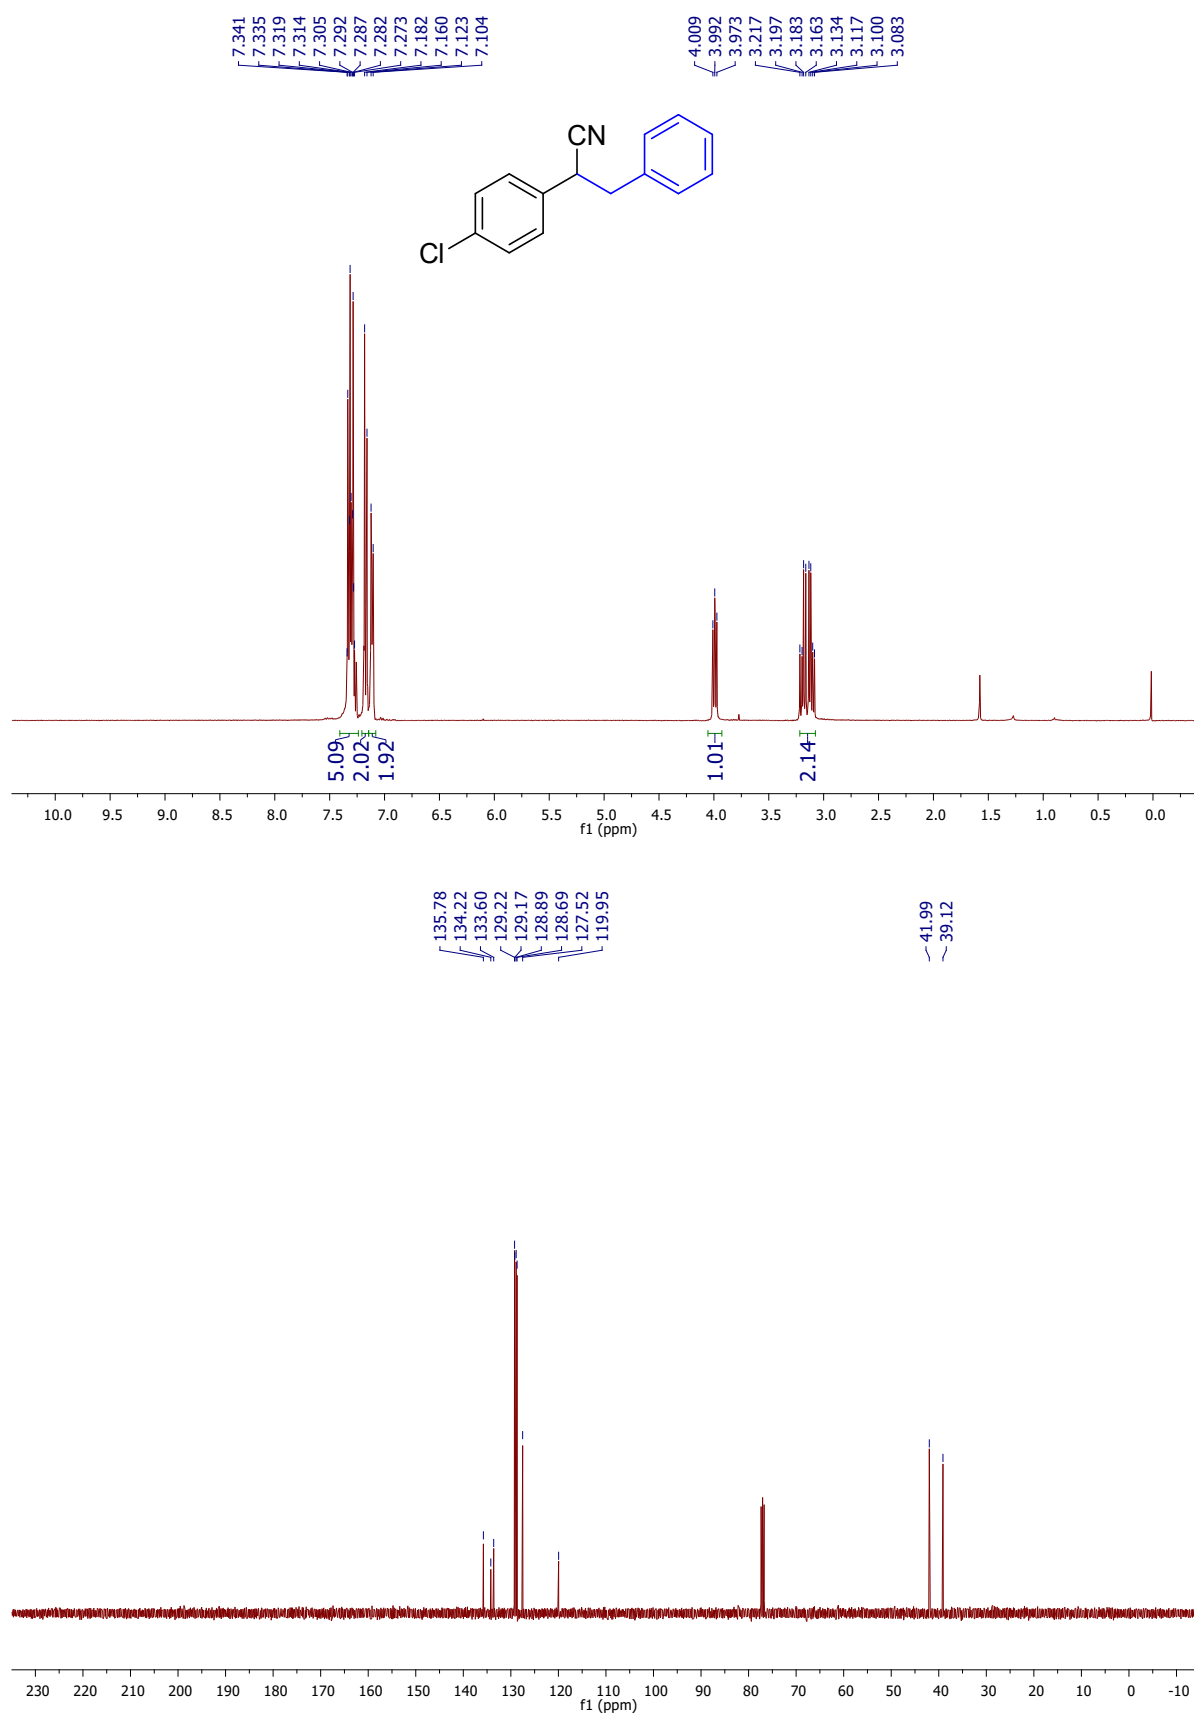

**Figure S34.** <sup>1</sup>H (400 MHz, CDCl<sub>3</sub>) and <sup>13</sup>C (100.6 MHz, CDCl<sub>3</sub>) NMR spectra of **8b**

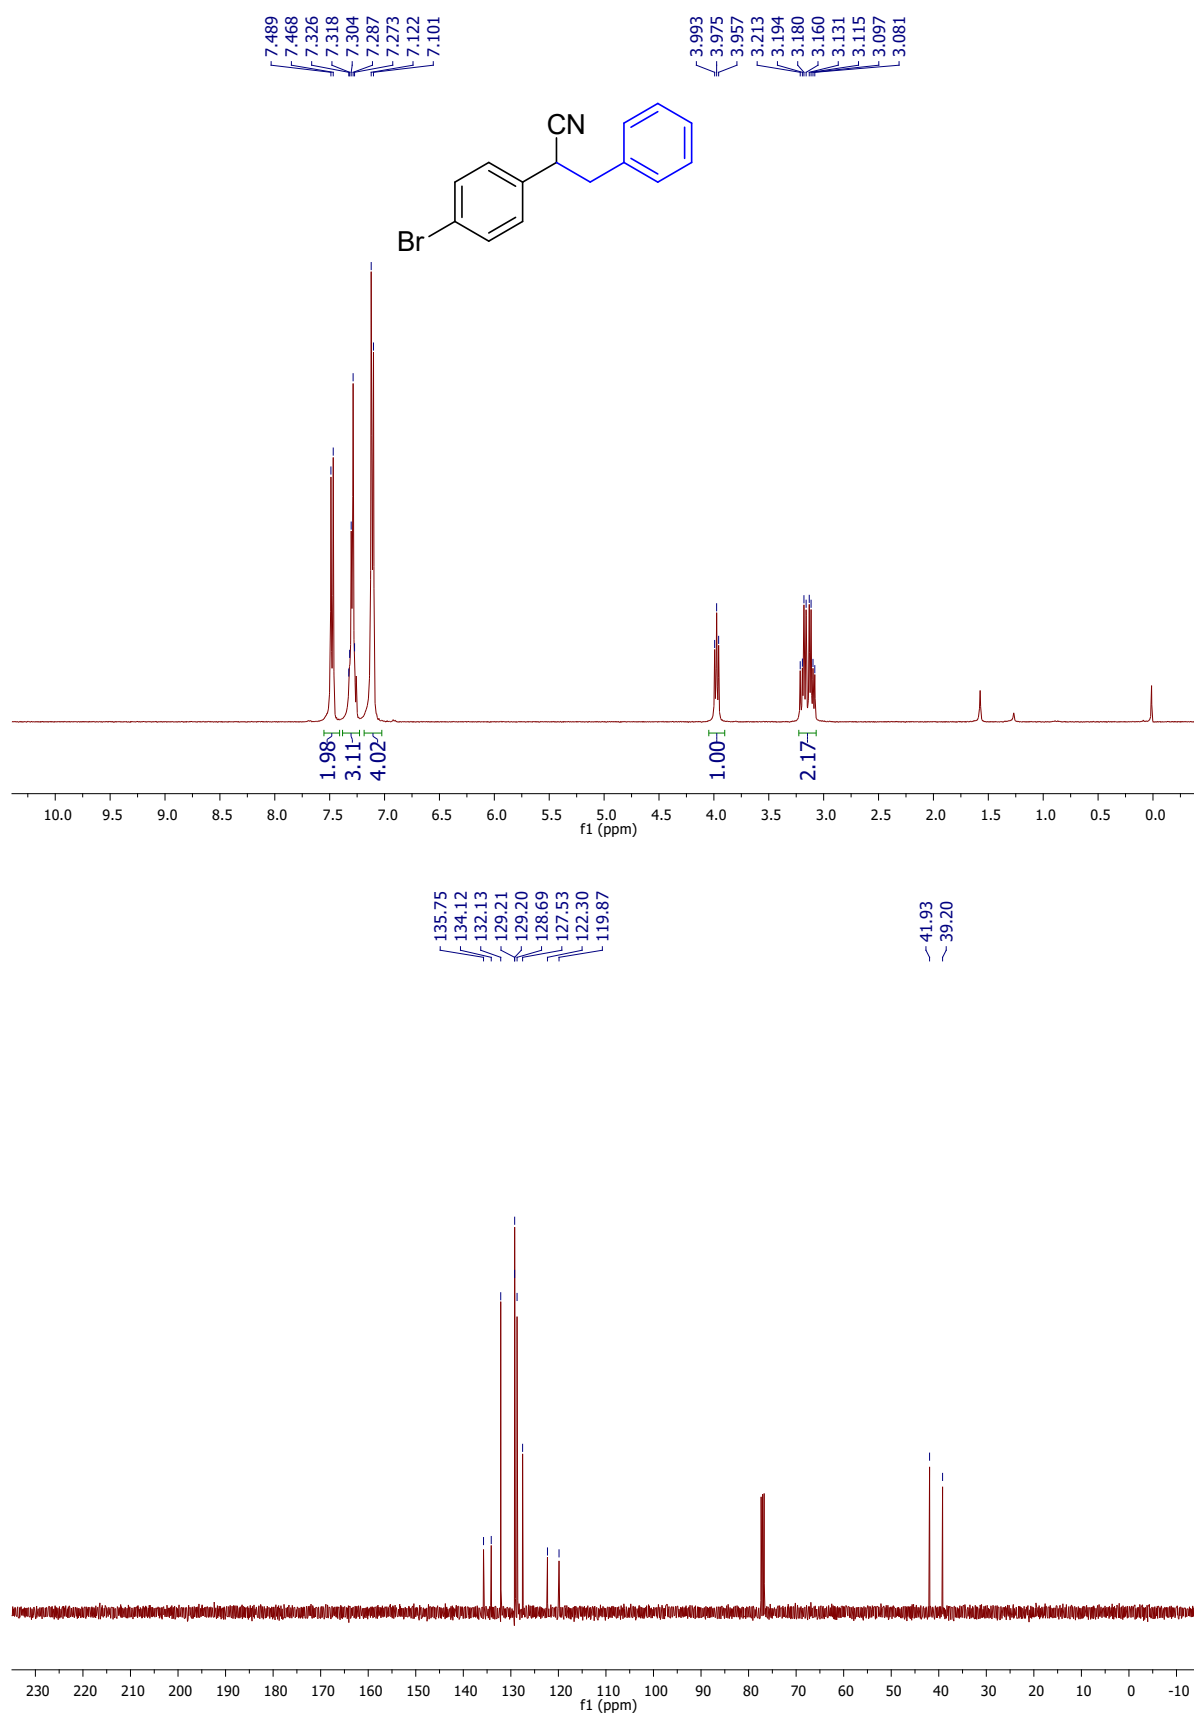

**Figure S35.**  $^1\text{H}$  (400 MHz,  $\text{CDCl}_3$ ) and  $^{13}\text{C}$  (100.6 MHz,  $\text{CDCl}_3$ ) NMR spectra of **8c**

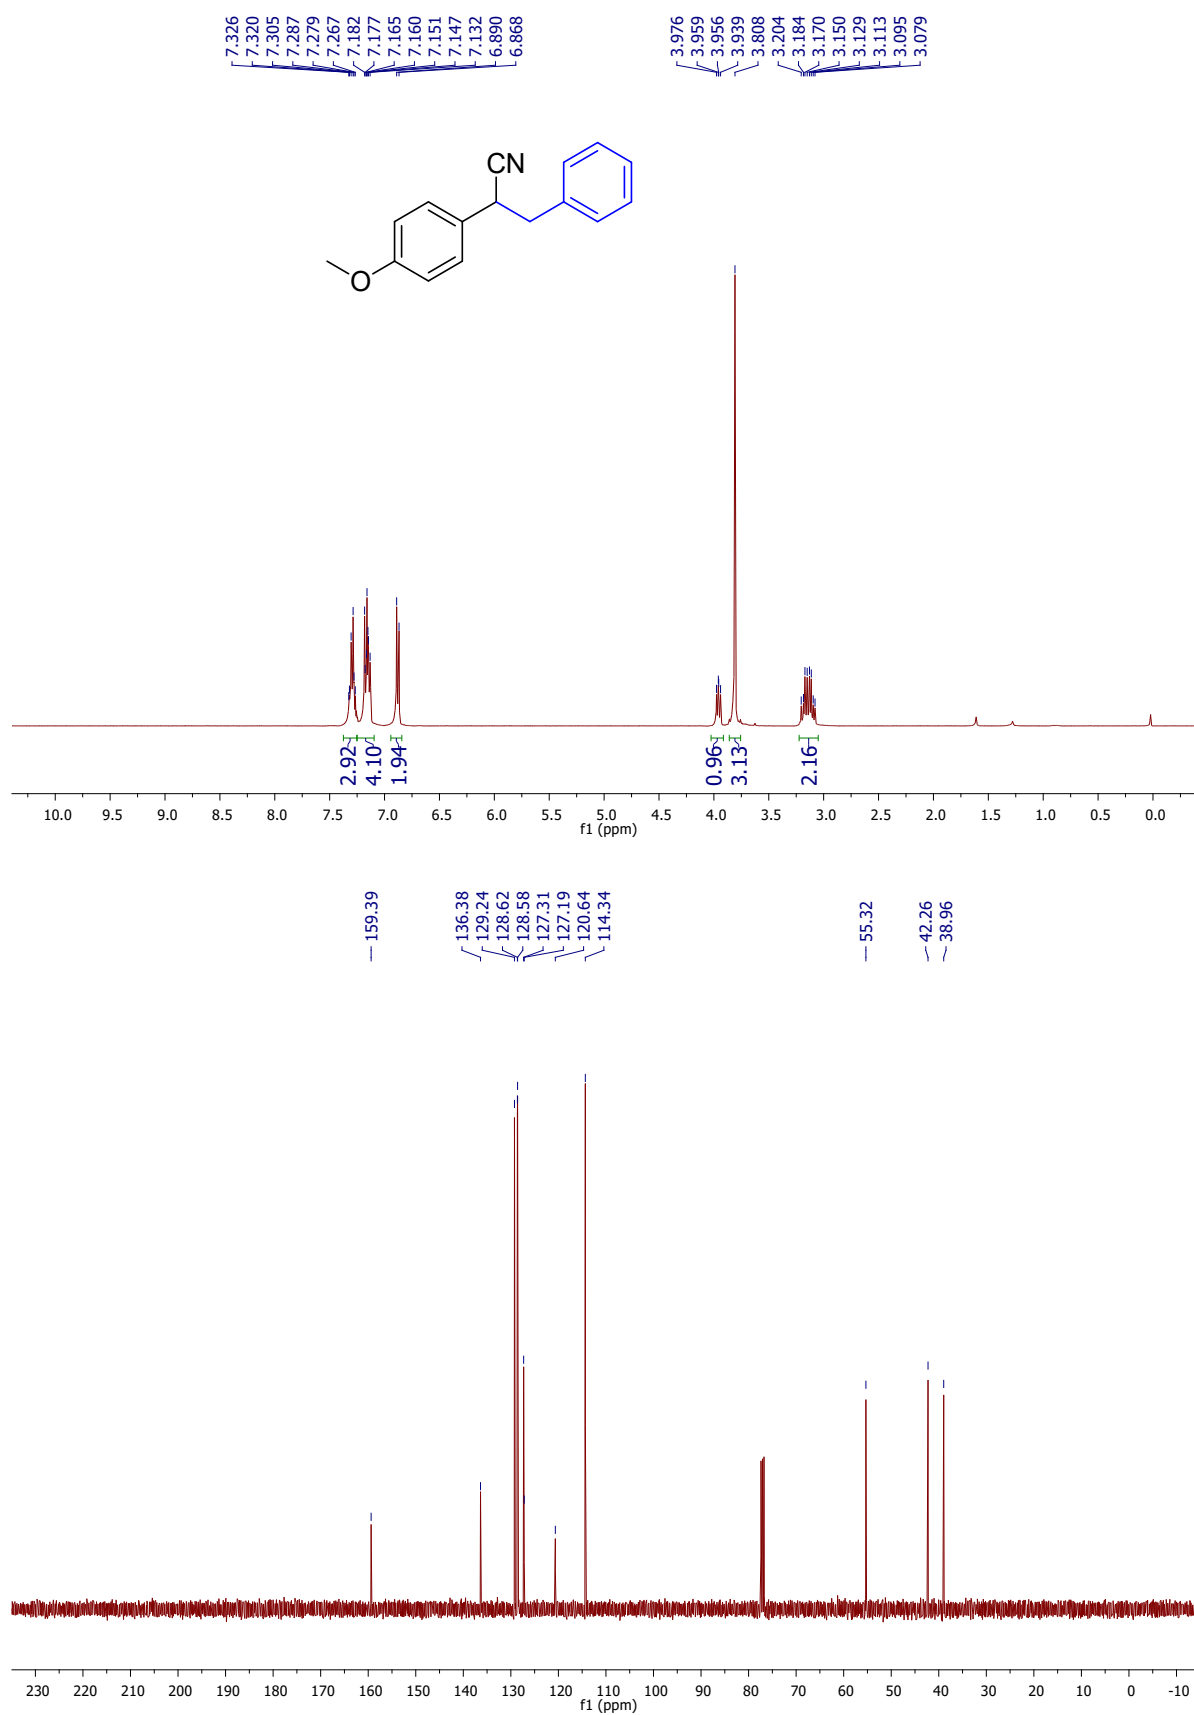

**Figure S36.** <sup>1</sup>H (400 MHz, CDCl<sub>3</sub>) and <sup>13</sup>C (100.6 MHz, CDCl<sub>3</sub>) NMR spectra of **8d**

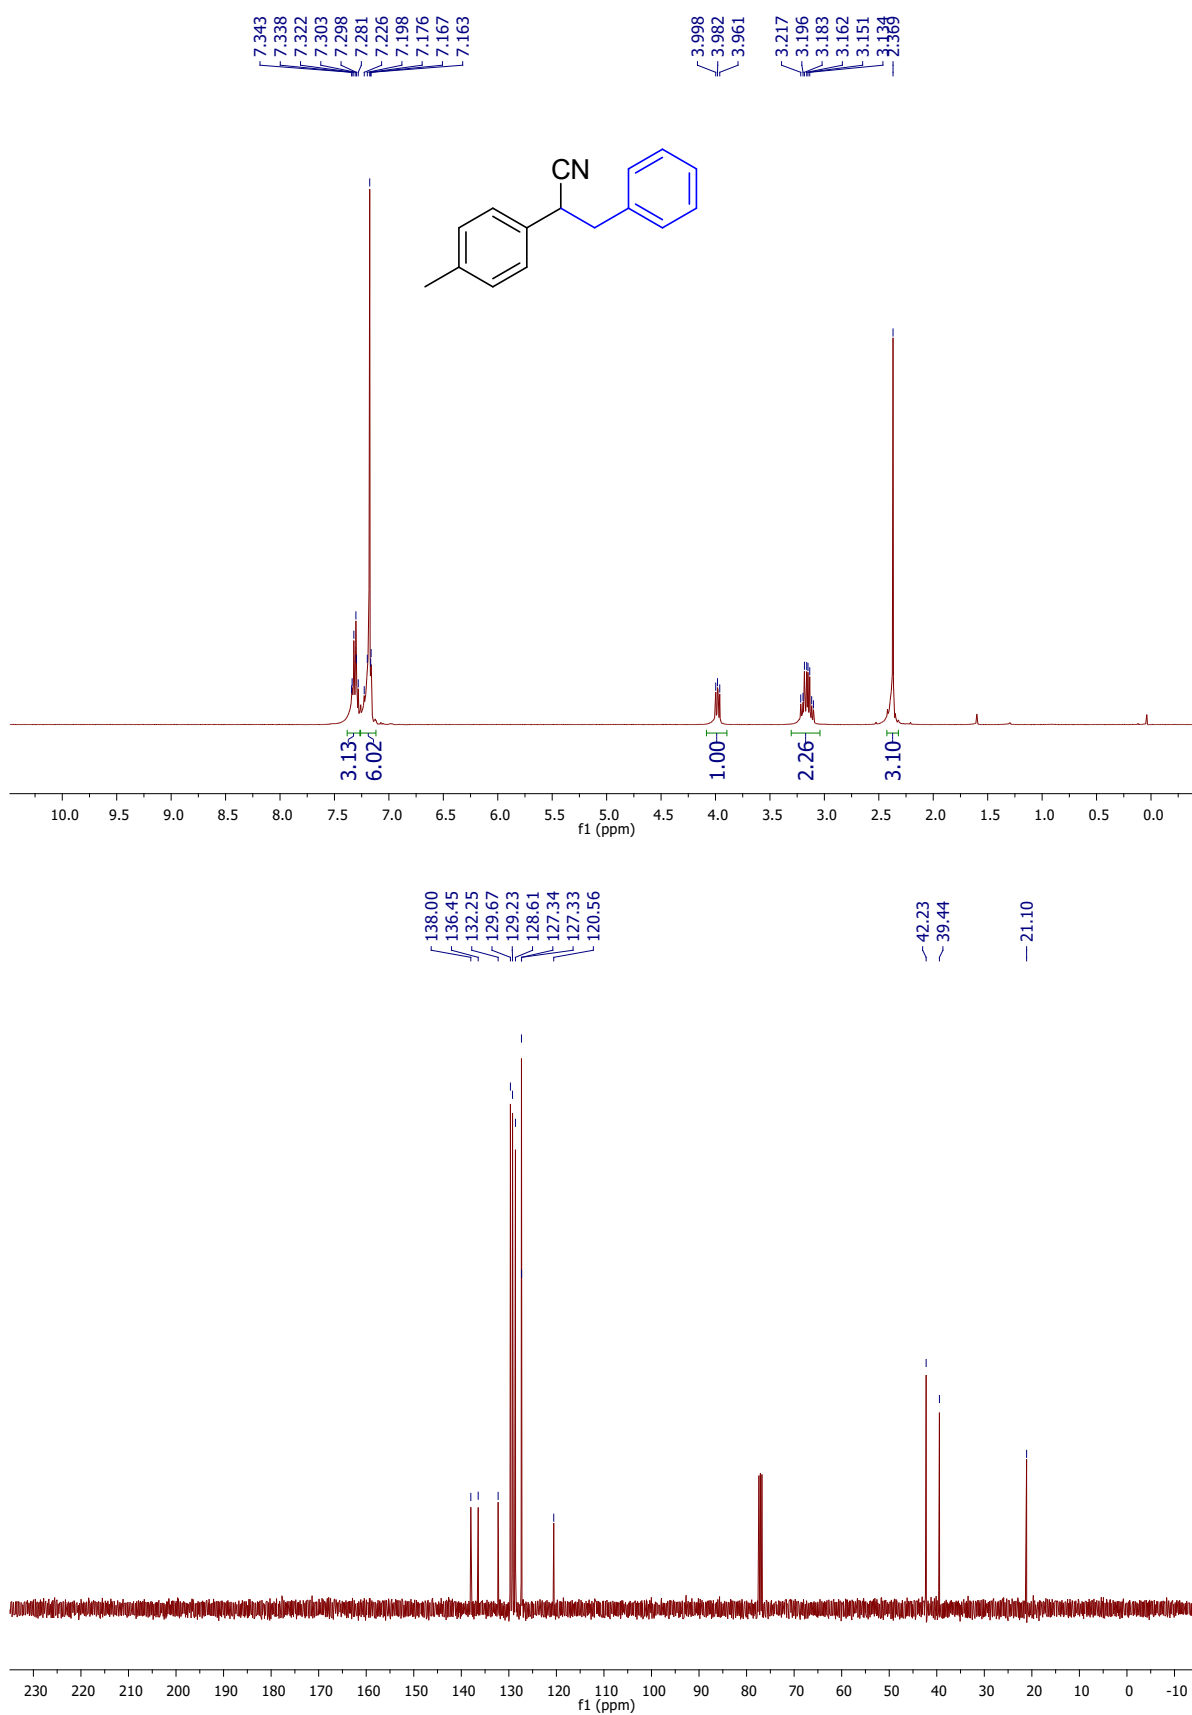

**Figure S37.** <sup>1</sup>H (400 MHz, CDCl<sub>3</sub>) and <sup>13</sup>C (100.6 MHz, CDCl<sub>3</sub>) NMR spectra of **8e**

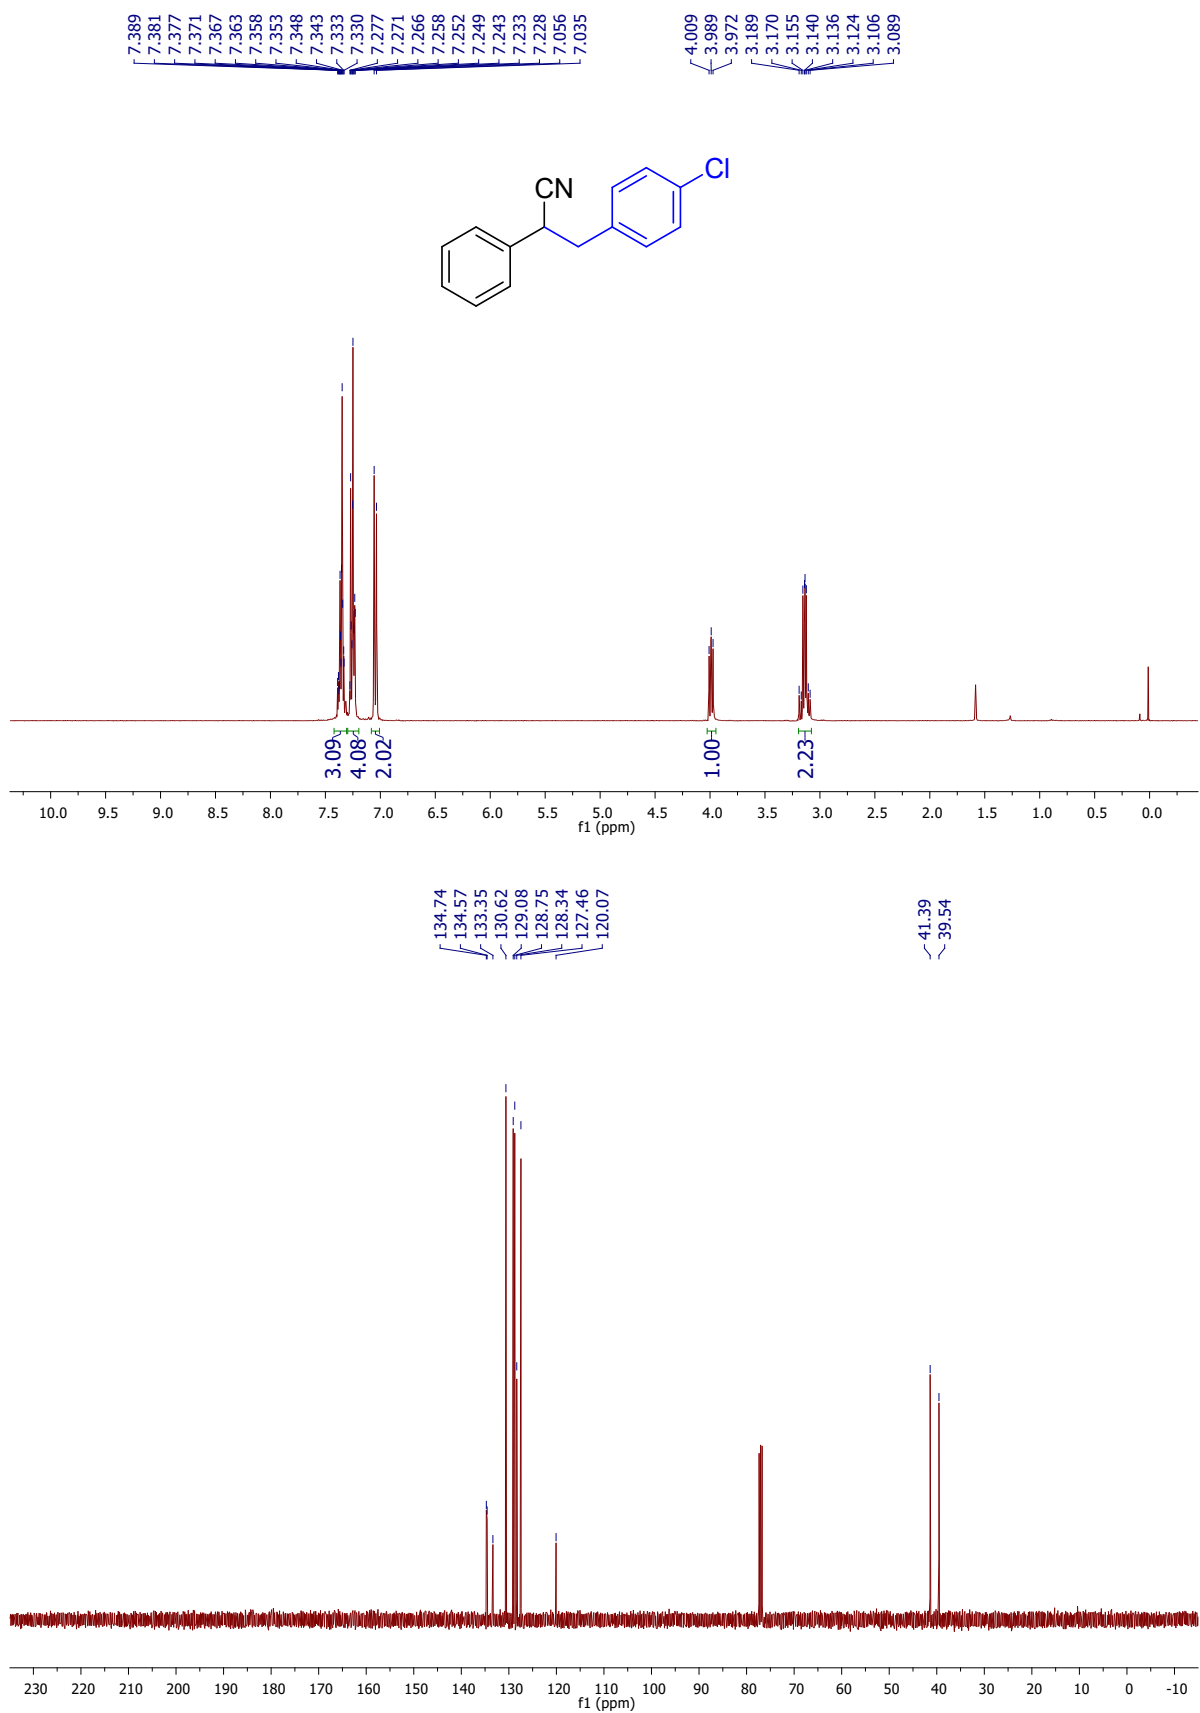

**Figure S38.** <sup>1</sup>H (400 MHz, CDCl<sub>3</sub>) and <sup>13</sup>C (100.6 MHz, CDCl<sub>3</sub>) NMR spectra of **8f**

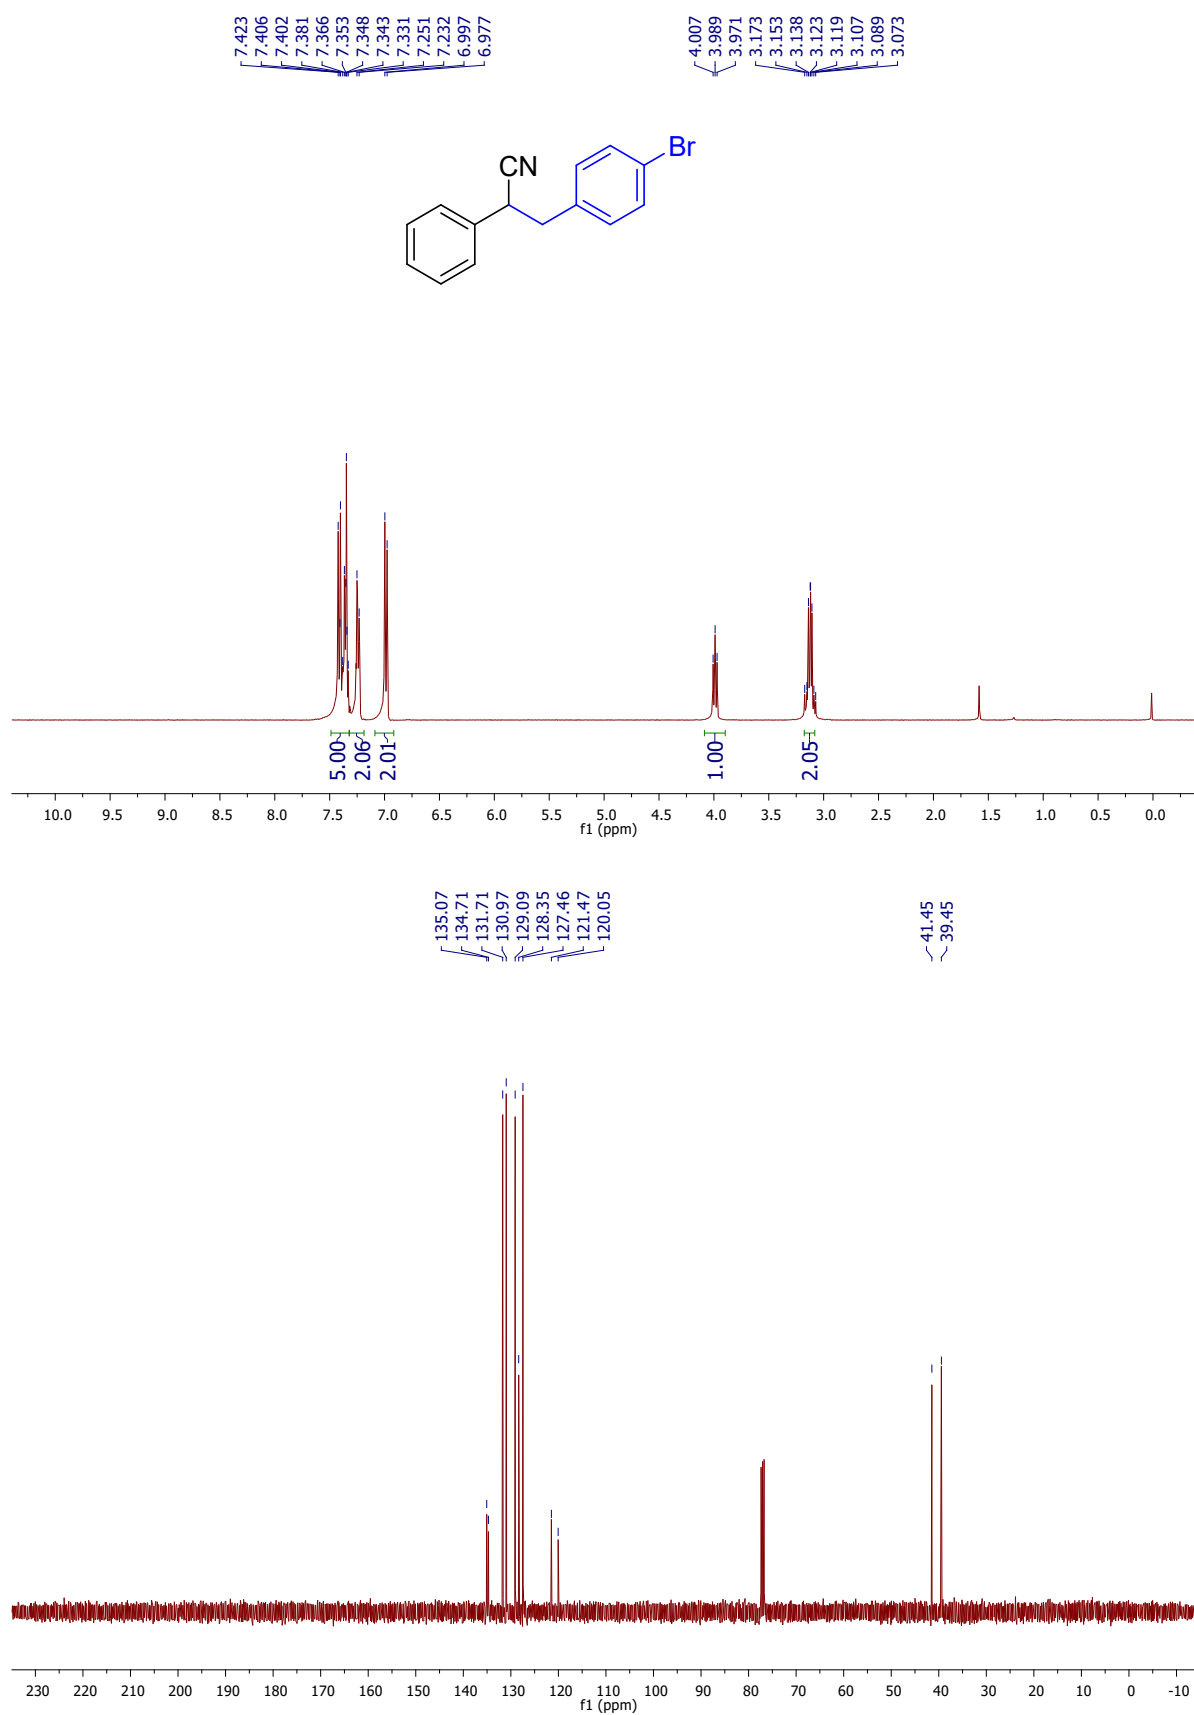

**Figure S39.** <sup>1</sup>H (400 MHz, CDCl<sub>3</sub>) and <sup>13</sup>C (100.6 MHz, CDCl<sub>3</sub>) NMR spectra of **8g**

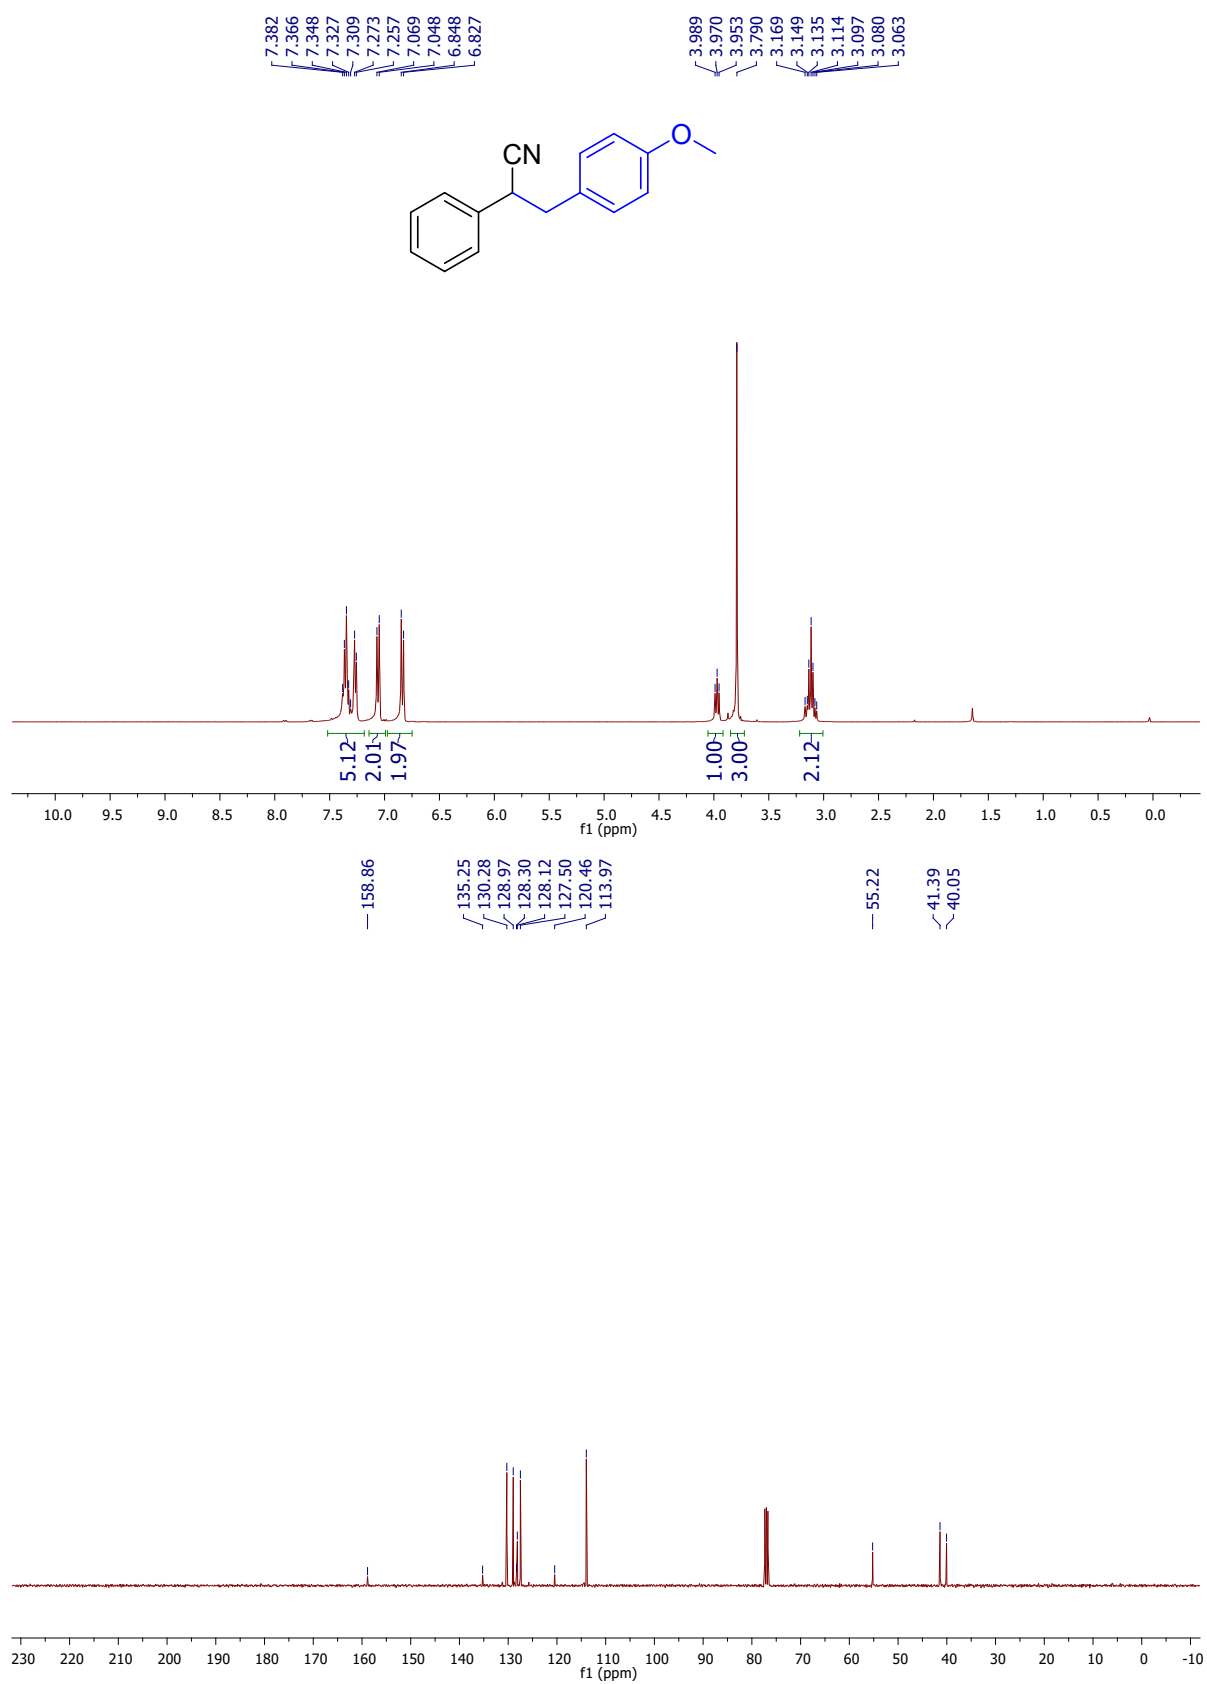

**Figure S40.** <sup>1</sup>H (400 MHz, CDCl<sub>3</sub>) and <sup>13</sup>C (100.6 MHz, CDCl<sub>3</sub>) NMR spectra of **8h**



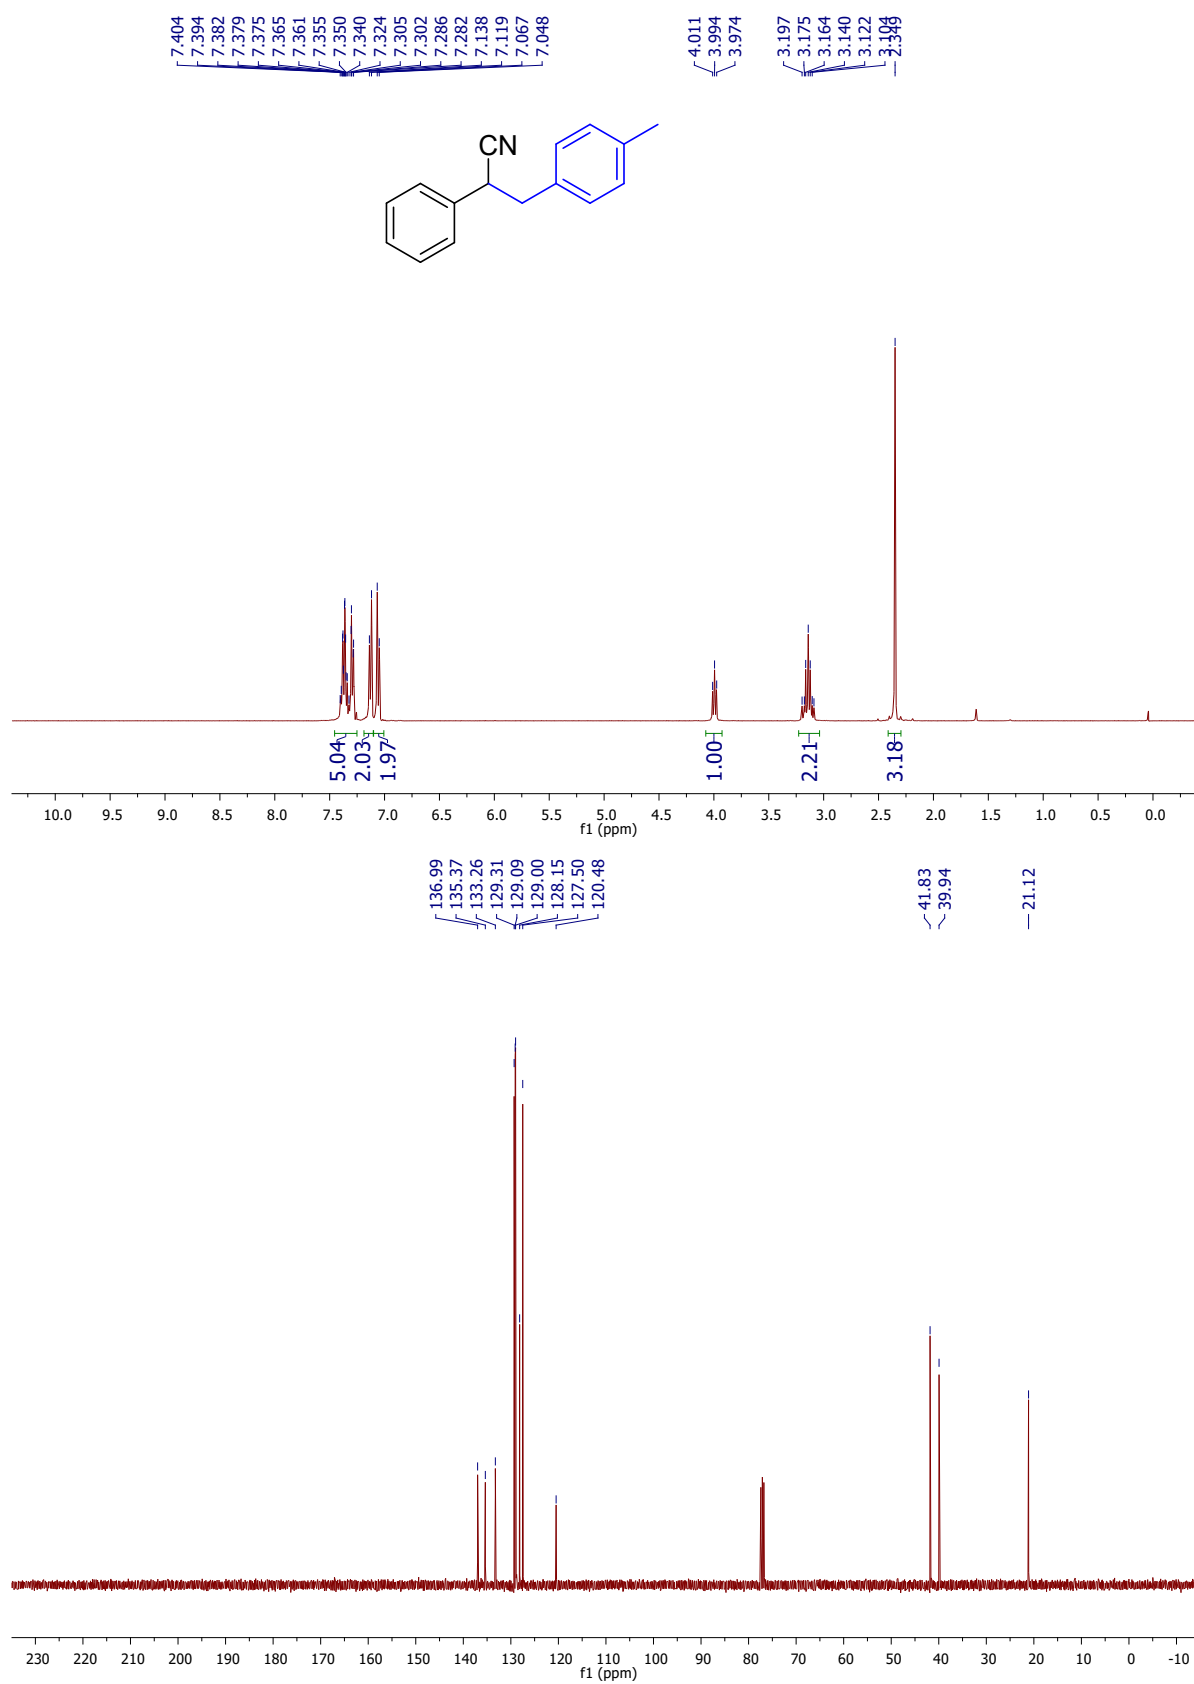

**Figure S41.** <sup>1</sup>H (400 MHz, CDCl<sub>3</sub>) and <sup>13</sup>C (100.6 MHz, CDCl<sub>3</sub>) NMR spectra of **8i**
